# Supplementary material for: Characterizing photosymbiosis in modern planktonic foraminifera
Source: Copernicus journal article supplement (doi:10.5194/bg-2019-145), 2019-04-26
Supplement: Supplementary file 1 [file bg-2019-145-supplement.pdf]

# Characterizing photosymbiosis in modern planktonic foraminifera

Haruka Takagi<sup>1,2</sup>, Katsunori Kimoto<sup>3</sup>, Tetsuichi Fujiki<sup>3</sup>, Hiroaki Saito<sup>1</sup>, Christiane Schmidt<sup>4</sup>, Michal Kucera<sup>4</sup>, Kazuyoshi Moriya<sup>5</sup>

<sup>1</sup>Atmosphere and Ocean Research Institute, The University of Tokyo, Japan

<sup>2</sup>Graduate School of Creative Science and Engineering, Waseda University, Japan

<sup>3</sup>Japan Agency for Earth-Marine Science and Technology, Japan

<sup>4</sup>MARUM-Center for Marine Environmental Sciences and Faculty of Geosciences, University of Bremen, Germany

<sup>5</sup>Department of Earth Sciences, School of Education, Waseda University, Japan

Correspondence to: Haruka Takagi (htakagi@aori.u-tokyo.ac.jp, harurah-t@fuji.waseda.jp)

## Supplementary materials

**Figure S1.** Summary of categorization of intracellular chlorophyll. (a) Specimens collected shallower than 100 m. (b) Specimens collected deeper than 100 m.

**Figure S2.** Cross plot of the incidence of symbiotic individuals (%) collected from the Pacific and the Atlantic.

**Figure S3.** Photomicrographs of *Globoturborotalita* species showing the presence of dinoflagellate symbionts. (a) *Globoturborotalita rubescens*, (b) *Globoturborotalita tenella* (spines are broken).

**Table S1.** Individual results of fast repetition rate fluorometric measurements and sampling information.

**Table S2.** Coefficients of regressional equation ( $y = bx^a$ ) to calculate protein biomass ( $\mu\text{g foraminifer}^{-1}$ ) from test size ( $\mu\text{m}$ ) based on Movellan (2013).

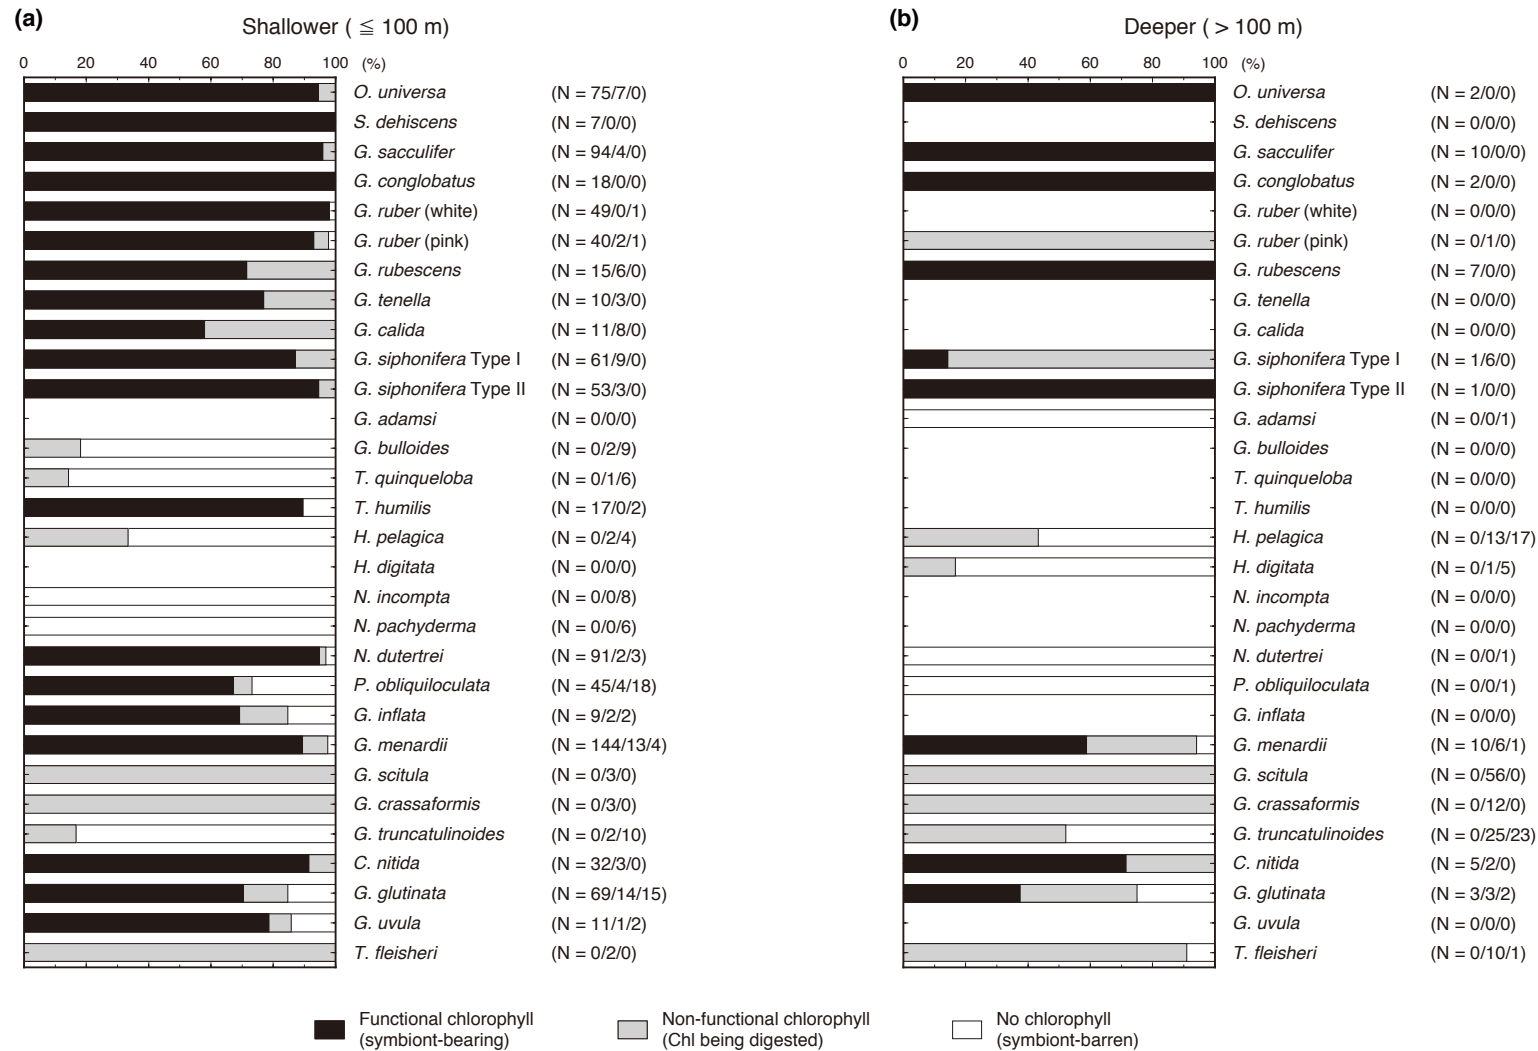

**Figure S1.** Summary of categorization of intracellular chlorophyll. (a) Specimens collected shallower than 100 m. (b) Specimens collected deeper than 100 m. The functionality of chlorophyll indicates the presence of symbionts. Numbers of specimens for three categories are represented in parentheses (functional chlorophyll / non-functional chlorophyll / no chlorophyll). The percentage of functional chlorophyll are essentially the same as the symbiont possession rate used as a variable to characterize photosymbiosis (see text for detail).

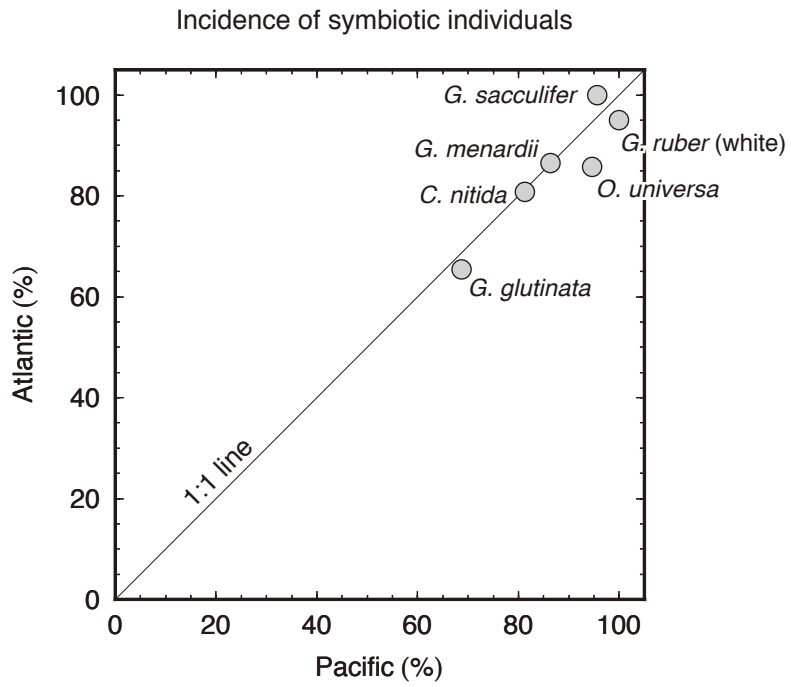

**Figure S2.** Cross plot of the incidence of symbiotic individuals (%) collected from the Pacific and the Atlantic. Species with enough sample number ( $N > 15$  for both basins) are shown. The difference between the two basin was not significant (Fisher's exact test, *O. universa*;  $p = 0.21$ , *G. sacculifer*;  $p = 1.0$ , *G. ruber* (white);  $p = 0.40$ , *G. menardii*;  $p = 1.0$ , *C. nitida*;  $p = 1.0$ , *G. glutinata*;  $p = 0.81$ ).

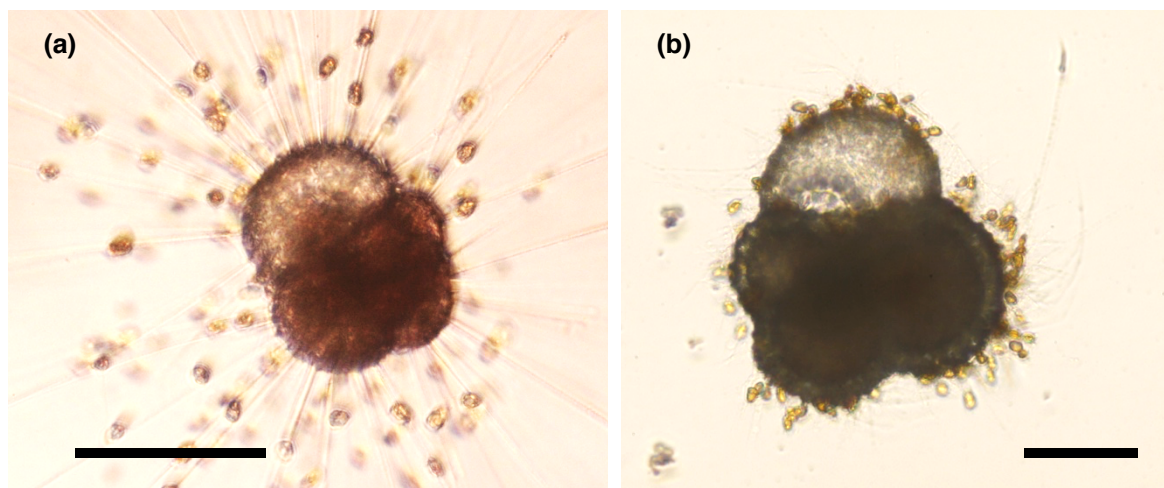

**Figure S3.** Photomicrographs of *Globoturborotalita* species showing the presence of dinoflagellate symbionts. (a) *Globoturborotalita rubescens*, (b) *Globoturborotalita tenella* (spines are broken). Scale bars are 100  $\mu\text{m}$ . Brownish algal cells are visible in both species. The algae have ovoid morphology with a slight constriction at the middle, which is typically seen in the other dinoflagellate-bearing species like *G. sacculifer*, *G. ruber*, *G. conglobatus*, and *O. universa*. The algal cell size were ca. 10  $\mu\text{m}$  in maximum length. Previous studies on the molecular phylogeny of spinose planktonic foraminifera showed that *G. rubescens* consistently forms a clade together with *G. conglobatus* and *G. ruber* (Sears et al., 2012; Spezzaferri et al., 2015). Considering the molecular phylogeny of modern species together with the fossil records, Spezzaferri et al. (2015) also argued that the *G. ruber-conglobatus* group including *G. rubescens* and the *G. sacculifer-O. universa* group shared a common ancestor that diverged in the late Oligocene. It implied that *G. rubescens* is likely to share the same dinoflagellate symbiont *Pelegodinium béii*. The photophysiology of the symbionts in *G. rubescens* did not contradict to this assumption from phylogeny. To clarify this, molecular identification of their symbionts is strongly required.

Sears, H. A., Darling, K. F., and Wade, C. M.: Ecological partitioning and diversity in tropical planktonic Foraminifera, *BMC Evolutionary Biology*, 12, 54, doi:10.1186/1471-2148-12-54, 2012.

Spezzaferri, S., Kucera, M., Pearson, P. N., Wade, B. S., Rappo, S., Poole, C. R., Morard, R., and Stalder, C.: Fossil and genetic evidence for the polyphyletic nature of the planktonic foraminifera “*Globigerinoides*”, and description of the new genus *Trilobatus*, *PLoS ONE*, 10, 5, e0128108, 2015.

**Table S1.** Individual results of fast repetition rate fluorometric measurements and sampling information. When the specimen was collected from the continuous pumped seawater on the ship, the position of the mid time of the sampling interval are represented. In such cases, no specific site name is given.

| Species                  | ID                     | Test size<br>( $\mu\text{m}$ ) | Chl <i>a</i> (ng<br>foraminifer <sup>-1</sup> ) | $F_v/F_n$ | $\sigma_{\text{PSII}} (\times 10^{-20} \text{ m}^2 \text{ quanta}^{-1})$ | Station / Cruise | Date       | Latitude-Longitude   | Depth<br>(m) | FRRf  |
|--------------------------|------------------------|--------------------------------|-------------------------------------------------|-----------|--------------------------------------------------------------------------|------------------|------------|----------------------|--------------|-------|
| <i>Orbulina universa</i> |                        |                                |                                                 |           |                                                                          |                  |            |                      |              |       |
|                          | 2-uni1                 | 179                            | 2.7                                             | 0.51      | 329                                                                      | MR14-02          | 2014.02.16 | 7°32.5'N-134°45'E    | Surface      | DF-03 |
|                          | 7-uni3                 | 464                            | 12.1                                            | 0.44      | 355                                                                      | MR14-02          | 2014.02.18 | 3°52'N-141°20'E      | Surface      | DF-03 |
|                          | 29-uni5                | 321                            | 6.2                                             | 0.43      | 393                                                                      | MR14-02          | 2014.03.12 | 7°58'N-156°2'E       | Surface      | DF-03 |
|                          | 31-uni6                | 875                            | 55.9                                            | 0.50      | 371                                                                      | MR14-02          | 2014.03.14 | 15°N-153°N           | Surface      | DF-03 |
|                          | 0718-1824_thin-spinose | 320                            | 17.2                                            | 0.50      | 495                                                                      | MR13-04          | 2013.07.18 | 35°35.2'N-145°55.6'E | Surface      | DF-03 |
|                          | 0719-0612_uni          | 200                            | 6.0                                             | 0.50      | 410                                                                      | MR13-04          | 2013.07.19 | 38°05'N-146°25'E     | Surface      | DF-03 |
|                          | 0719-0612-uni2         | 422                            | 17.2                                            | 0.45      | 444                                                                      | MR13-04          | 2013.07.19 | 38°05'N-146°25'E     | Surface      | DF-03 |
|                          | 0720-1218_uni_large    | 278                            | 5.9                                             | 0.45      | 439                                                                      | MR13-04          | 2013.07.25 | 42°24.3'N-153°02.7'E | Surface      | DF-03 |
|                          | 0725-1924_uni          | 300                            | 21.5                                            | 0.40      | 392                                                                      | MR13-04          | 2013.07.25 | 42°24.3'N-152°56.3'E | Surface      | DF-03 |
|                          | 0725-1924_uni2         | 670                            | 19.4                                            | 0.41      | 456                                                                      | MR13-04          | 2013.07.25 | 42°24.3'N-152°56.3'E | Surface      | DF-03 |
|                          | 0725-1924_uni-juve     | 200                            | 10.6                                            | 0.45      | 374                                                                      | MR13-04          | 2013.07.25 | 42°24.3'N-152°56.3'E | Surface      | DF-03 |
|                          | 0725-1319_uni          | 600                            | 14.0                                            | 0.51      | 605                                                                      | MR13-04          | 2013.07.25 | 43°21.2'N-154°27.1'E | Surface      | DF-03 |
|                          | 0725-1319_uni2         | 444                            | 28.3                                            | 0.49      | 611                                                                      | MR13-04          | 2013.07.25 | 43°21.2'N-154°27.1'E | Surface      | DF-03 |
|                          | 0725-1319_uni-juv      | 311                            | 6.0                                             | 0.43      | 561                                                                      | MR13-04          | 2013.07.25 | 43°21.2'N-154°27.1'E | Surface      | DF-03 |
|                          | 0725-1319_uni3         | 411                            | 21.8                                            | 0.44      | 466                                                                      | MR13-04          | 2013.07.25 | 43°21.2'N-154°27.1'E | Surface      | DF-03 |
|                          | 0725-1924_uni3         | 300                            | 15.8                                            | 0.51      | 448                                                                      | MR13-04          | 2013.07.25 | 42°24.3'N-152°56.3'E | Surface      | DF-03 |
|                          | 0725-1924_uni4         | 478                            | 25.5                                            | 0.52      | 463                                                                      | MR13-04          | 2013.07.25 | 42°24.3'N-152°56.3'E | Surface      | DF-03 |
|                          | 0725-1924_uni5         | 489                            | 30.1                                            | 0.33      | 492                                                                      | MR13-04          | 2013.07.25 | 42°24.3'N-152°56.3'E | Surface      | DF-03 |
|                          | 2_uni                  | 620                            | 29.4                                            | 0.49      | 546                                                                      | Sagami Bay       | 2013.08.05 | 35°10'N-139°11'E     | Surface      | DF-03 |
|                          | KY14-09_4-uni-juve     | 357                            | 9.5                                             | 0.52      | 544                                                                      | KY14-09          | 2014.06.21 | 30°03.1'N-144°58.3'E | Surface      | DF-03 |
|                          | tap1_uni1              | 216                            | 3.0                                             | 0.50      | 618                                                                      | KS-16-9          | 2016.07.18 | 34°10.4'N-140°04.5'E | Surface      | DF-03 |
|                          | Mana_uni1              | 785                            | 36.1                                            | 0.51      | 755                                                                      | Manazuru         | 2016.10.24 | 35°07'N-139°08'E     | Surface      | DF-03 |
|                          | Mana_uni2              | 904                            | 51.4                                            | 0.48      | 538                                                                      | Manazuru         | 2016.10.24 | 35°07'N-139°08'E     | Surface      | DF-03 |
|                          | Mana_uni4              | 871                            | 13.5                                            | 0.52      | 783                                                                      | Manazuru         | 2016.10.24 | 35°07'N-139°08'E     | Surface      | DF-03 |
|                          | St11_uni1              | 818                            | 50.0                                            | 0.54      | 328                                                                      | St11 / KH-17-4   | 2017.09.12 | 21°30'N-170°W        | 100-0        | DF-14 |
|                          | St11_uni2              | 818                            | 53.3                                            | 0.46      | 339                                                                      | St11 / KH-17-4   | 2017.09.12 | 21°30'N-170°W        | 100-0        | DF-14 |
|                          | St11_uni3              | 886                            | 52.2                                            | 0.51      | 407                                                                      | St11 / KH-17-4   | 2017.09.12 | 21°30'N-170°W        | 100-0        | DF-14 |
|                          | St11_uni4              | 726                            | 31.5                                            | 0.52      | 338                                                                      | St11 / KH-17-4   | 2017.09.12 | 21°30'N-170°W        | 100-0        | DF-14 |
|                          | St11_uni5              | 675                            | 26.5                                            | 0.56      | 409                                                                      | St11 / KH-17-4   | 2017.09.12 | 21°30'N-170°W        | 100-0        | DF-14 |
|                          | St11_uni6              | 743                            | 31.1                                            | 0.47      | 422                                                                      | St11 / KH-17-4   | 2017.09.12 | 21°30'N-170°W        | 100-0        | DF-14 |
|                          | St12_uni7              | 633                            | 17.6                                            | 0.50      | 346                                                                      | St12 / KH-17-4   | 2017.09.16 | 23°N-180°E/W         | 200-150      | DF-14 |
|                          | St12_uni8              | 894                            | 60.4                                            | 0.55      | 440                                                                      | St12 / KH-17-4   | 2017.09.16 | 23°N-180°E/W         | 150-100      | DF-14 |
|                          | St12_uni25             | 726                            | 4.1                                             | -         | -                                                                        | St12 / KH-17-4   | 2017.09.16 | 23°N-180°E/W         | 50-20        | DF-14 |
|                          | St12_uni26             | 844                            | 17.5                                            | -         | -                                                                        | St12 / KH-17-4   | 2017.09.16 | 23°N-180°E/W         | 50-20        | DF-14 |
|                          | St12_uni27             | 624                            | 41.8                                            | 0.47      | 510                                                                      | St12 / KH-17-4   | 2017.09.16 | 23°N-180°E/W         | 100-0        | DF-14 |
|                          | St12_uni28             | 810                            | 54.7                                            | 0.54      | 364                                                                      | St12 / KH-17-4   | 2017.09.16 | 23°N-180°E/W         | 100-0        | DF-14 |
|                          | St12_uni29             | 818                            | 8.8                                             | 0.46      | 724                                                                      | St12 / KH-17-4   | 2017.09.16 | 23°N-180°E/W         | 100-0        | DF-14 |
|                          | St12_uni30             | 683                            | 55.1                                            | 0.53      | 497                                                                      | St12 / KH-17-4   | 2017.09.16 | 23°N-180°E/W         | 100-0        | DF-14 |
|                          | St12_uni38             | 692                            | 2.1                                             | -         | -                                                                        | St12 / KH-17-4   | 2017.09.16 | 23°N-180°E/W         | 100-0        | DF-14 |
|                          | St12_uni39             | 852                            | 23.2                                            | 0.44      | 476                                                                      | St12 / KH-17-4   | 2017.09.16 | 23°N-180°E/W         | 100-0        | DF-14 |
|                          | St12_uni40             | 844                            | 12.5                                            | 0.37      | 550                                                                      | St12 / KH-17-4   | 2017.09.16 | 23°N-180°E/W         | 100-0        | DF-14 |
|                          | St12_uni41             | 861                            | 35.6                                            | 0.49      | 415                                                                      | St12 / KH-17-4   | 2017.09.16 | 23°N-180°E/W         | 100-0        | DF-14 |
|                          | St12_uni42             | 641                            | 17.6                                            | 0.54      | 541                                                                      | St12 / KH-17-4   | 2017.09.16 | 23°N-180°E/W         | 100-0        | DF-14 |
|                          | St12_uni44             | 793                            | 50.3                                            | 0.52      | 466                                                                      | St12 / KH-17-4   | 2017.09.16 | 23°N-180°E/W         | 100-0        | DF-14 |
|                          | St12_uni45             | 759                            | 44.2                                            | 0.54      | 393                                                                      | St12 / KH-17-4   | 2017.09.16 | 23°N-180°E/W         | 100-0        | DF-14 |
|                          | St12_uni46             | 785                            | 39.4                                            | 0.52      | 367                                                                      | St12 / KH-17-4   | 2017.09.16 | 23°N-180°E/W         | 100-0        | DF-14 |
|                          | St12_uni47             | 726                            | 54.1                                            | 0.57      | 419                                                                      | St12 / KH-17-4   | 2017.09.16 | 23°N-180°E/W         | 100-0        | DF-14 |
|                          | St12_uni48             | 945                            | 50.1                                            | 0.48      | 372                                                                      | St12 / KH-17-4   | 2017.09.16 | 23°N-180°E/W         | 100-0        | DF-14 |
|                          | St12_uni49             | 903                            | 38.8                                            | 0.50      | 351                                                                      | St12 / KH-17-4   | 2017.09.16 | 23°N-180°E/W         | 100-0        | DF-14 |
|                          | St12_uni50             | 810                            | 35.3                                            | 0.46      | 344                                                                      | St12 / KH-17-4   | 2017.09.16 | 23°N-180°E/W         | 100-0        | DF-14 |
|                          | St12_uni51             | 793                            | 42.6                                            | 0.54      | 379                                                                      | St12 / KH-17-4   | 2017.09.16 | 23°N-180°E/W         | 100-0        | DF-14 |
|                          | St12_uni52             | 878                            | 68.4                                            | 0.44      | 768                                                                      | St12 / KH-17-4   | 2017.09.16 | 23°N-180°E/W         | 100-0        | DF-14 |
|                          | St12_uni53             | 785                            | 16.7                                            | 0.54      | 383                                                                      | St12 / KH-17-4   | 2017.09.16 | 23°N-180°E/W         | 100-0        | DF-14 |
|                          | St12_uni54             | 726                            | 12.6                                            | 0.46      | 437                                                                      | St12 / KH-17-4   | 2017.09.16 | 23°N-180°E/W         | 100-0        | DF-14 |
|                          | St12_uni57             | 768                            | 48.0                                            | 0.54      | 398                                                                      | St12 / KH-17-4   | 2017.09.16 | 23°N-180°E/W         | 100-0        | DF-14 |
|                          | St12_uni58             | 608                            | 14.6                                            | 0.52      | 368                                                                      | St12 / KH-17-4   | 2017.09.16 | 23°N-180°E/W         | 100-0        | DF-14 |

| Species                           | ID               | Test size<br>( $\mu\text{m}$ ) | Chl <i>a</i> (ng<br>foraminifer <sup>-1</sup> ) | $F_v/F_n$ | $\sigma_{\text{psfl}} (\times 10^{-20} \text{ m}^2 \text{ quanta}^{-1})$ | Station / Cruise | Date       | Latitude-Longitude   | Depth<br>(m) | FRRF  |
|-----------------------------------|------------------|--------------------------------|-------------------------------------------------|-----------|--------------------------------------------------------------------------|------------------|------------|----------------------|--------------|-------|
| <i>Sphaeroidinella dehisces</i>   |                  |                                |                                                 |           |                                                                          |                  |            |                      |              |       |
|                                   | tap4_sac116-dehi | 544                            | 11.1                                            | 0.50      | 622                                                                      | KH-16-7          | 2016.12.08 | 26°40.7'N-145°14.3'E | Surface      | DF-03 |
|                                   | tap4_sac117-dehi | 520                            | 5.8                                             | 0.52      | 619                                                                      | KH-16-7          | 2016.12.08 | 26°40.7'N-145°14.3'E | Surface      | DF-03 |
|                                   | tap4_sac121-dehi | 421                            | 6.5                                             | 0.53      | 479                                                                      | KH-16-7          | 2016.12.08 | 26°40.7'N-145°14.3'E | Surface      | DF-03 |
|                                   | tap6_sac132-dehi | 537                            | 10.5                                            | 0.55      | 554                                                                      | KH-16-7          | 2016.12.08 | 23°52.9'N-139°31'E   | Surface      | DF-03 |
|                                   | tap4_sac147-dehi | 562                            | 7.0                                             | 0.52      | 652                                                                      | KH-16-7          | 2016.12.08 | 26°40.7'N-145°14.3'E | Surface      | DF-03 |
|                                   | tap3_sac149-dehi | 320                            | 2.6                                             | 0.56      | 606                                                                      | KH-16-7          | 2016.12.07 | 28°37.6'N-143°55.4'E | Surface      | DF-03 |
|                                   | tap8_sac154-dehi | 287                            | 1.2                                             | 0.61      | 468                                                                      | KH-16-7          | 2016.12.12 | 23°N-131°45'E        | Surface      | DF-03 |
| <i>Globigerinoides sacculifer</i> |                  |                                |                                                 |           |                                                                          |                  |            |                      |              |       |
|                                   | 0713-0006_sac    | 340                            | 10.9                                            | 0.57      | 321                                                                      | MR13-04          | 2013.07.13 | 32°56.8'N-143°59.5'E | Surface      | DF-03 |
|                                   | 0713-0006_sac2   | 322                            | 5.9                                             | 0.46      | 414                                                                      | MR13-04          | 2013.07.13 | 32°56.8'N-143°59.5'E | Surface      | DF-03 |
|                                   | 0713-0006_sac3   | 222                            | 3.7                                             | 0.33      | 228                                                                      | MR13-04          | 2013.07.13 | 32°56.8'N-143°59.5'E | Surface      | DF-03 |
|                                   | 0717-0612_sac    | 289                            | 4.8                                             | 0.48      | 562                                                                      | MR13-04          | 2013.07.17 | 30°N-145°E           | Surface      | DF-03 |
|                                   | 0719-0612_sac    | 655                            | 30.6                                            | 0.52      | 541                                                                      | MR13-04          | 2013.07.19 | 38°05'N-146°25'E     | Surface      | DF-03 |
|                                   | 0719-0612_sac2   | 266                            | 13.3                                            | 0.54      | 453                                                                      | MR13-04          | 2013.07.19 | 38°05'N-146°25'E     | Surface      | DF-03 |
|                                   | 1-sac1           | 411                            | 12.7                                            | 0.44      | 363                                                                      | MR14-02          | 2014.02.15 | 8°10'N-134°45'E      | Surface      | DF-03 |
|                                   | 2-sac2           | 357                            | 12.1                                            | 0.48      | 375                                                                      | MR14-02          | 2014.02.16 | 7°32.5'N-134°45'E    | Surface      | DF-03 |
|                                   | 4-sac3           | 286                            | 5.6                                             | 0.53      | 475                                                                      | MR14-02          | 2014.02.16 | 6°40'N-138°55'E      | Surface      | DF-03 |
|                                   | 5-sac4           | 268                            | 3.4                                             | 0.48      | 395                                                                      | MR14-02          | 2014.02.17 | 5°43.2'N-139°43.3'E  | Surface      | DF-03 |
|                                   | 5-sac5           | 393                            | 6.7                                             | 0.53      | 550                                                                      | MR14-02          | 2014.02.17 | 5°43.2'N-139°43.3'E  | Surface      | DF-03 |
|                                   | 4-sac6           | 482                            | 16.3                                            | 0.53      | 572                                                                      | MR14-02          | 2014.02.16 | 6°40'N-138°55'E      | Surface      | DF-03 |
|                                   | 4-sac7           | 375                            | 22.6                                            | 0.55      | 464                                                                      | MR14-02          | 2014.02.16 | 6°40'N-138°55'E      | Surface      | DF-03 |
|                                   | 6-sac8           | 304                            | 27.3                                            | 0.53      | 554                                                                      | MR14-02          | 2014.02.17 | 4°47.6'N-140°31.6'E  | Surface      | DF-03 |
|                                   | 8-sac9           | 375                            | 25.4                                            | 0.48      | 412                                                                      | MR14-02          | 2014.02.18 | 4°13.7'N-142°53.9'E  | Surface      | DF-03 |
|                                   | 18-sac10         | 393                            | 30.5                                            | 0.46      | 493                                                                      | MR14-02          | 2014.02.27 | 4°30'S-156°E         | Surface      | DF-03 |
|                                   | 18-sac11         | 304                            | 5.0                                             | 0.47      | 429                                                                      | MR14-02          | 2014.02.27 | 4°30'S-156°E         | Surface      | DF-03 |
|                                   | 18-sac12         | 339                            | 7.3                                             | 0.41      | 436                                                                      | MR14-02          | 2014.02.27 | 4°30'S-156°E         | Surface      | DF-03 |
|                                   | 18-sac13         | 321                            | 9.4                                             | 0.41      | 381                                                                      | MR14-02          | 2014.02.27 | 4°30'S-156°E         | Surface      | DF-03 |
|                                   | 18-sac14         | 339                            | 16.1                                            | 0.48      | 409                                                                      | MR14-02          | 2014.02.27 | 4°30'S-156°E         | Surface      | DF-03 |
|                                   | 18-sac15         | 304                            | 10.9                                            | 0.45      | 390                                                                      | MR14-02          | 2014.02.27 | 4°30'S-156°E         | Surface      | DF-03 |
|                                   | 18-sac16         | 286                            | 10.5                                            | 0.50      | 368                                                                      | MR14-02          | 2014.02.27 | 4°30'S-156°E         | Surface      | DF-03 |
|                                   | 18-sac17         | 286                            | 3.7                                             | 0.54      | 323                                                                      | MR14-02          | 2014.02.27 | 4°30'S-156°E         | Surface      | DF-03 |
|                                   | 18-sac18         | 304                            | 5.6                                             | 0.47      | 369                                                                      | MR14-02          | 2014.02.27 | 4°30'S-156°E         | Surface      | DF-03 |
|                                   | 18-sac19         | 286                            | 6.1                                             | 0.52      | 504                                                                      | MR14-02          | 2014.02.27 | 4°30'S-156°E         | Surface      | DF-03 |
|                                   | 18-sac20         | 268                            | 3.1                                             | 0.51      | 344                                                                      | MR14-02          | 2014.02.27 | 4°30'S-156°E         | Surface      | DF-03 |
|                                   | 18-sac21         | 268                            | 5.9                                             | 0.54      | 454                                                                      | MR14-02          | 2014.02.27 | 4°30'S-156°E         | Surface      | DF-03 |
|                                   | 18-sac22         | 357                            | 11.4                                            | 0.39      | 466                                                                      | MR14-02          | 2014.02.27 | 4°30'S-156°E         | Surface      | DF-03 |
|                                   | 18-sac23         | 446                            | 34.5                                            | 0.53      | 584                                                                      | MR14-02          | 2014.02.27 | 4°30'S-156°E         | Surface      | DF-03 |
|                                   | 18-sac24         | 429                            | 13.1                                            | 0.53      | 422                                                                      | MR14-02          | 2014.02.27 | 4°30'S-156°E         | Surface      | DF-03 |
|                                   | 18-sac25         | 429                            | 20.0                                            | 0.53      | 489                                                                      | MR14-02          | 2014.02.27 | 4°30'S-156°E         | Surface      | DF-03 |
|                                   | 18-sac26         | 339                            | 6.5                                             | 0.44      | 431                                                                      | MR14-02          | 2014.02.27 | 4°30'S-156°E         | Surface      | DF-03 |
|                                   | 18-sac27         | 357                            | 6.7                                             | 0.48      | 552                                                                      | MR14-02          | 2014.02.27 | 4°30'S-156°E         | Surface      | DF-03 |
|                                   | 18-sac28         | 375                            | 38.0                                            | 0.56      | 646                                                                      | MR14-02          | 2014.02.27 | 4°30'S-156°E         | Surface      | DF-03 |
|                                   | 18-sac29         | 446                            | 21.3                                            | 0.54      | 539                                                                      | MR14-02          | 2014.02.27 | 4°30'S-156°E         | Surface      | DF-03 |
|                                   | 18-sac30         | 446                            | 12.0                                            | 0.52      | 507                                                                      | MR14-02          | 2014.02.27 | 4°30'S-156°E         | Surface      | DF-03 |
|                                   | 18-sac31         | 357                            | 15.8                                            | 0.49      | 438                                                                      | MR14-02          | 2014.02.27 | 4°30'S-156°E         | Surface      | DF-03 |
|                                   | 18-sac32         | 464                            | 34.8                                            | 0.52      | 462                                                                      | MR14-02          | 2014.02.27 | 4°30'S-156°E         | Surface      | DF-03 |
|                                   | 18-sac33         | 375                            | 6.6                                             | 0.44      | 434                                                                      | MR14-02          | 2014.02.27 | 4°30'S-156°E         | Surface      | DF-03 |
|                                   | 18-sac34         | 375                            | 22.7                                            | 0.52      | 513                                                                      | MR14-02          | 2014.02.27 | 4°30'S-156°E         | Surface      | DF-03 |
|                                   | 18-sac35         | 393                            | 12.9                                            | 0.40      | 455                                                                      | MR14-02          | 2014.02.27 | 4°30'S-156°E         | Surface      | DF-03 |
|                                   | 18-sac36         | 375                            | 12.1                                            | 0.51      | 510                                                                      | MR14-02          | 2014.02.27 | 4°30'S-156°E         | Surface      | DF-03 |
|                                   | 18-sac37         | 321                            | 5.0                                             | 0.42      | 344                                                                      | MR14-02          | 2014.02.27 | 4°30'S-156°E         | Surface      | DF-03 |
|                                   | 18-sac38         | 250                            | 7.7                                             | 0.56      | 617                                                                      | MR14-02          | 2014.02.27 | 4°30'S-156°E         | Surface      | DF-03 |
|                                   | 18-sac39         | 286                            | 4.8                                             | 0.50      | 544                                                                      | MR14-02          | 2014.02.27 | 4°30'S-156°E         | Surface      | DF-03 |
|                                   | 18-sac40         | 214                            | 5.4                                             | 0.32      | 432                                                                      | MR14-02          | 2014.02.27 | 4°30'S-156°E         | Surface      | DF-03 |
|                                   | 18-sac41         | 250                            | 3.5                                             | –         | –                                                                        | MR14-02          | 2014.02.27 | 4°30'S-156°E         | Surface      | DF-03 |
|                                   | 18-sac42         | 304                            | 6.0                                             | –         | –                                                                        | MR14-02          | 2014.02.27 | 4°30'S-156°E         | Surface      | DF-03 |
|                                   | 18-sac43         | 321                            | 35.3                                            | 0.55      | 580                                                                      | MR14-02          | 2014.02.27 | 4°30'S-156°E         | Surface      | DF-03 |
|                                   | 18-sac44         | 268                            | 5.7                                             | 0.41      | 338                                                                      | MR14-02          | 2014.02.27 | 4°30'S-156°E         | Surface      | DF-03 |
|                                   | 18-sac45         | 357                            | 9.2                                             | 0.49      | 503                                                                      | MR14-02          | 2014.02.27 | 4°30'S-156°E         | Surface      | DF-03 |
|                                   | 18-sac46         | 268                            | 3.6                                             | 0.36      | 383                                                                      | MR14-02          | 2014.02.27 | 4°30'S-156°E         | Surface      | DF-03 |
|                                   | 18-sac47         | 304                            | 7.3                                             | 0.52      | 372                                                                      | MR14-02          | 2014.02.27 | 4°30'S-156°E         | Surface      | DF-03 |
|                                   | 18-sac48         | 375                            | 9.3                                             | 0.44      | 421                                                                      | MR14-02          | 2014.02.27 | 4°30'S-156°E         | Surface      | DF-03 |

| Species                            | ID             | Test size<br>( $\mu\text{m}$ ) | Chl <i>a</i> (ng<br>foraminifer <sup>-1</sup> ) | $F_v/F_n$ | $\sigma_{\text{psl}} (\times 10^{-20} \text{ m}^2$<br>quanta <sup>-1</sup> ) | Station / Cruise | Date       | Latitude-Longitude   | Depth<br>(m) | FRRF  |
|------------------------------------|----------------|--------------------------------|-------------------------------------------------|-----------|------------------------------------------------------------------------------|------------------|------------|----------------------|--------------|-------|
|                                    | 18-sac51       | 339                            | 6.8                                             | 0.49      | 454                                                                          | MR14-02          | 2014.02.27 | 4°30'S-156°E         | Surface      | DF-03 |
|                                    | 18-sac52       | 286                            | 3.7                                             | 0.37      | 366                                                                          | MR14-02          | 2014.02.27 | 4°30'S-156°E         | Surface      | DF-03 |
|                                    | 18-sac53       | 286                            | 3.5                                             | –         | –                                                                            | MR14-02          | 2014.02.27 | 4°30'S-156°E         | Surface      | DF-03 |
|                                    | 18-sac54       | 357                            | 17.9                                            | 0.52      | 573                                                                          | MR14-02          | 2014.02.27 | 4°30'S-156°E         | Surface      | DF-03 |
|                                    | 18-sac55       | 161                            | 3.0                                             | 0.51      | 489                                                                          | MR14-02          | 2014.02.27 | 4°30'S-156°E         | Surface      | DF-03 |
|                                    | 20-sac56       | 304                            | 4.9                                             | 0.45      | 368                                                                          | MR14-02          | 2014.03.01 | 4°30'S-156°E         | Surface      | DF-03 |
|                                    | 20-sac57       | 339                            | 7.1                                             | 0.41      | 372                                                                          | MR14-02          | 2014.03.01 | 4°30'S-156°E         | Surface      | DF-03 |
|                                    | 20-sac58       | 321                            | 5.8                                             | 0.50      | 350                                                                          | MR14-02          | 2014.03.01 | 4°30'S-156°E         | Surface      | DF-03 |
|                                    | 20-sac59       | 500                            | 9.1                                             | 0.50      | 443                                                                          | MR14-02          | 2014.03.01 | 4°30'S-156°E         | Surface      | DF-03 |
|                                    | 20-sac60       | 304                            | 6.0                                             | –         | –                                                                            | MR14-02          | 2014.03.01 | 4°30'S-156°E         | Surface      | DF-03 |
|                                    | 20-sac61       | 304                            | 3.1                                             | 0.39      | 312                                                                          | MR14-02          | 2014.03.01 | 4°30'S-156°E         | Surface      | DF-03 |
|                                    | 20-sac62       | 393                            | 13.1                                            | 0.52      | 469                                                                          | MR14-02          | 2014.03.01 | 4°30'S-156°E         | Surface      | DF-03 |
|                                    | 20-sac63       | 357                            | 10.6                                            | 0.47      | 406                                                                          | MR14-02          | 2014.03.01 | 4°30'S-156°E         | Surface      | DF-03 |
|                                    | 20-sac64       | 321                            | 4.8                                             | 0.48      | 442                                                                          | MR14-02          | 2014.03.01 | 4°30'S-156°E         | Surface      | DF-03 |
|                                    | 20-sac65       | 321                            | 5.2                                             | 0.51      | 400                                                                          | MR14-02          | 2014.03.01 | 4°30'S-156°E         | Surface      | DF-03 |
|                                    | 20-sac66       | 304                            | 5.7                                             | 0.48      | 484                                                                          | MR14-02          | 2014.03.01 | 4°30'S-156°E         | Surface      | DF-03 |
|                                    | 20-sac67       | 411                            | 9.6                                             | 0.50      | 378                                                                          | MR14-02          | 2014.03.01 | 4°30'S-156°E         | Surface      | DF-03 |
|                                    | 20-sac68       | 393                            | 9.0                                             | 0.43      | 341                                                                          | MR14-02          | 2014.03.01 | 4°30'S-156°E         | Surface      | DF-03 |
|                                    | 20-sac69       | 304                            | 5.2                                             | 0.51      | 411                                                                          | MR14-02          | 2014.03.01 | 4°30'S-156°E         | Surface      | DF-03 |
|                                    | 31sac70        | 571                            | 28.8                                            | 0.58      | 395                                                                          | MR14-02          | 2014.03.14 | 15°N-153°E           | Surface      | DF-03 |
|                                    | tap2_sac1      | 312                            | 8.8                                             | 0.48      | 688                                                                          | KS-16-9          | 2016.07.18 | 32°28.9'N-141°50.2'E | Surface      | DF-03 |
|                                    | tap3_sac3      | 471                            | 7.6                                             | 0.50      | 625                                                                          | KS-16-9          | 2016.07.19 | 32°09.7'N-142°04.2'E | Surface      | DF-03 |
|                                    | tap3_sac4      | 333                            | 3.6                                             | 0.61      | 474                                                                          | KS-16-9          | 2016.07.19 | 32°09.7'N-142°04.2'E | Surface      | DF-03 |
|                                    | tap3_sac6      | 272                            | 4.1                                             | 0.59      | 485                                                                          | KS-16-9          | 2016.07.19 | 32°09.7'N-142°04.2'E | Surface      | DF-03 |
|                                    | tap4_sac8      | 377                            | 6.2                                             | 0.56      | 594                                                                          | KS-16-9          | 2016.07.19 | 31°17.1'N-142°25.3'E | Surface      | DF-03 |
|                                    | tap5_sac9      | 362                            | 2.7                                             | 0.39      | 458                                                                          | KS-16-9          | 2016.07.19 | 28°57.5'N-143°18'E   | Surface      | DF-03 |
|                                    | N150-100_sac12 | 314                            | 8.2                                             | 0.46      | 443                                                                          | KS-16-9          | 2016.07.22 | 27°N-144°E           | 150–100      | DF-03 |
|                                    | N150-100_sac13 | 646                            | 31.6                                            | 0.51      | 546                                                                          | KS-16-9          | 2016.07.22 | 27°N-144°E           | 150–100      | DF-03 |
|                                    | N150-100_sac14 | 504                            | 5.2                                             | 0.50      | 447                                                                          | KS-16-9          | 2016.07.22 | 27°N-144°E           | 150–100      | DF-03 |
|                                    | N150-100_sac15 | 491                            | 10.3                                            | 0.55      | 640                                                                          | KS-16-9          | 2016.07.22 | 27°N-144°E           | 150–100      | DF-03 |
|                                    | N150-100_sac16 | 466                            | 11.1                                            | 0.48      | 573                                                                          | KS-16-9          | 2016.07.22 | 27°N-144°E           | 150–100      | DF-03 |
|                                    | N200-150_sac17 | 416                            | 8.9                                             | 0.45      | 461                                                                          | KS-16-9          | 2016.07.22 | 27°N-144°E           | 200–150      | DF-03 |
|                                    | N200-150_sac18 | 352                            | 10.3                                            | 0.47      | 592                                                                          | KS-16-9          | 2016.07.22 | 27°N-144°E           | 200–150      | DF-03 |
|                                    | N200-150_sac19 | 234                            | 2.9                                             | 0.50      | 531                                                                          | KS-16-9          | 2016.07.22 | 27°N-144°E           | 200–150      | DF-03 |
|                                    | N200-150_sac20 | 461                            | 8.4                                             | 0.40      | 424                                                                          | KS-16-9          | 2016.07.22 | 27°N-144°E           | 200–150      | DF-03 |
|                                    | N150-100_sac22 | 591                            | 9.0                                             | 0.39      | 396                                                                          | KS-16-9          | 2016.07.22 | 27°N-144°E           | 150–100      | DF-03 |
|                                    | St22402_sac1   | 567                            | 19.4                                            | 0.44      | 538                                                                          | 22402 / M140     | 2017.08.12 | 15°52.2'N-28°44.7'W  | 40–20        | DF-14 |
|                                    | St22402_sac2   | 561                            | 42.1                                            | 0.54      | 610                                                                          | 22402 / M140     | 2017.08.12 | 15°52.2'N-28°44.7'W  | 40–20        | DF-14 |
|                                    | St22402_sac3   | 479                            | 10.0                                            | 0.57      | 415                                                                          | 22402 / M140     | 2017.08.12 | 15°52.2'N-28°44.7'W  | 40–20        | DF-14 |
|                                    | 22413_sac5_0   | 499                            | 25.0                                            | 0.55      | 512                                                                          | 22413 / M140     | 2017.08.27 | 19°31.4'N-22°35.4'W  | 20–0         | DF-14 |
|                                    | 22413_sac6_0   | 331                            | 14.9                                            | 0.56      | 419                                                                          | 22413 / M140     | 2017.08.27 | 19°31.4'N-22°35.4'W  | 20–0         | DF-14 |
|                                    | 22413_sac7_0   | 352                            | 9.9                                             | 0.51      | 554                                                                          | 22413 / M140     | 2017.08.27 | 19°31.4'N-22°35.4'W  | 20–0         | DF-14 |
|                                    | 22413_sac8     | 236                            | 4.4                                             | 0.48      | 497                                                                          | 22413 / M140     | 2017.08.27 | 19°31.4'N-22°35.4'W  | 20–0         | DF-14 |
|                                    | 22413_sac9_0   | 327                            | 7.5                                             | 0.52      | 523                                                                          | 22413 / M140     | 2017.08.27 | 19°31.4'N-22°35.4'W  | 40–20        | DF-14 |
|                                    | 22413_sac10_0  | 356                            | 13.9                                            | 0.57      | 554                                                                          | 22413 / M140     | 2017.08.27 | 19°31.4'N-22°35.4'W  | 40–20        | DF-14 |
|                                    | 22413_sac11    | 398                            | 4.2                                             | 0.56      | 550                                                                          | 22413 / M140     | 2017.08.27 | 19°31.4'N-22°35.4'W  | 40–20        | DF-14 |
|                                    | 22413_sac12_0  | 308                            | 4.0                                             | 0.54      | 392                                                                          | 22413 / M140     | 2017.08.27 | 19°31.4'N-22°35.4'W  | 40–20        | DF-14 |
|                                    | 22417_sac13_0  | 444                            | 28.6                                            | 0.56      | 484                                                                          | 22417 / M140     | 2017.08.31 | 20°52.1'N-18°56.3'W  | 20–0         | DF-14 |
|                                    | 22421_sac14    | 246                            | 3.9                                             | 0.50      | 307                                                                          | 22421 / M140     | 2017.09.03 | 24°43.7'N-16°34.7'W  | 40–20        | DF-14 |
|                                    | 22421_sac15    | 253                            | 4.2                                             | 0.55      | 415                                                                          | 22421 / M140     | 2017.09.03 | 24°43.7'N-16°34.7'W  | 60–40        | DF-14 |
|                                    | 22421_sac16    | 283                            | 3.9                                             | 0.51      | 560                                                                          | 22421 / M140     | 2017.09.03 | 24°43.7'N-16°34.7'W  | 60–40        | DF-14 |
|                                    | 22421_sac17    | 242                            | 2.5                                             | 0.47      | 480                                                                          | 22421 / M140     | 2017.09.03 | 24°43.7'N-16°34.7'W  | 80–60        | DF-14 |
|                                    | tap1_sac1_0    | 304                            | 5.4                                             | 0.56      | 287                                                                          | KH-17-4          | 2017.09.10 | 21°16.6'N-160°45'W   | Surface      | DF-14 |
|                                    | tap1_sac2_0    | 363                            | 8.9                                             | 0.52      | 269                                                                          | KH-17-4          | 2017.09.10 | 21°16.6'N-160°45'W   | Surface      | DF-14 |
| <i>Globigerinoides conglobatus</i> |                |                                |                                                 |           |                                                                              |                  |            |                      |              |       |
|                                    | 1-con1         | 321                            | 6.8                                             | 0.38      | 342                                                                          | MR14-02          | 2014.02.15 | 8°10'N-134°45'E      | Surface      | DF-03 |
|                                    | 7-con2         | 429                            | 21.5                                            | 0.51      | 571                                                                          | MR14-02          | 2017.02.18 | 3°52'N-141°20'E      | Surface      | DF-03 |
|                                    | 9-con3         | 732                            | 15.7                                            | 0.43      | 386                                                                          | MR14-02          | 2017.02.19 | 4°35.4'N-144°27.8'E  | Surface      | DF-03 |
|                                    | 9-con4         | 607                            | 25.5                                            | 0.36      | 335                                                                          | MR14-02          | 2017.02.19 | 4°35.4'N-144°27.8'E  | Surface      | DF-03 |
|                                    | 9-con5         | 571                            | 14.5                                            | 0.32      | 451                                                                          | MR14-02          | 2017.02.19 | 4°35.4'N-144°27.8'E  | Surface      | DF-03 |
|                                    | 12-con         | 268                            | 5.7                                             | 0.53      | 447                                                                          | MR14-02          | 2014.02.21 | 1°N-147°E            | Surface      | DF-03 |
|                                    | 18-sac49-con   | 357                            | 24.0                                            | 0.52      | 493                                                                          | MR14-02          | 2014.02.27 | 4°30'S-156°E         | Surface      | DF-03 |
|                                    | 18-sac50-con   | 304                            | 6.4                                             | 0.42      | 413                                                                          | MR14-02          | 2014.02.27 | 4°30'S-156°E         | Surface      | DF-03 |

| Species                              | ID                    | Test size<br>( $\mu\text{m}$ ) | Chl <i>a</i> (ng<br>foraminifer <sup>-1</sup> ) | $F_v/F_n$ | $\sigma_{\text{psl}} (\times 10^{-20} \text{ m}^2 \text{ quanta}^{-1})$ | Station / Cruise | Date       | Latitude-Longitude   | Depth<br>(m) | FRRF  |
|--------------------------------------|-----------------------|--------------------------------|-------------------------------------------------|-----------|-------------------------------------------------------------------------|------------------|------------|----------------------|--------------|-------|
|                                      | 31-con6               | 714                            | 37.5                                            | 0.49      | 415                                                                     | MR14-02          | 2014.03.14 | 15°N-153°E           | Surface      | DF-03 |
|                                      | 31-con7               | 607                            | 27.9                                            | 0.55      | 332                                                                     | MR14-02          | 2014.03.14 | 15°N-153°E           | Surface      | DF-03 |
|                                      | 0713-0006-cong        | 367                            | 18.3                                            | 0.55      | 493                                                                     | MR13-04          | 2013.07.13 | 32°56.8'N-143°59.5'E | Surface      | DF-03 |
|                                      | 0713-0006_large_con   | 556                            | 14.5                                            | 0.38      | 558                                                                     | MR13-04          | 2013.07.13 | 32°56.8'N-143°59.5'E | Surface      | DF-03 |
|                                      | 0718-0612-cong        | 344                            | 6.0                                             | 0.50      | 410                                                                     | MR13-04          | 2013.07.18 | 33°53.4'N-145°02.8'E | Surface      | DF-03 |
|                                      | 0719-0612-cong        | 489                            | 10.1                                            | 0.43      | 382                                                                     | MR13-04          | 2013.07.19 | 38°05'N-146°25'E     | Surface      | DF-03 |
|                                      | cong_KEO-c2-50-0      | 464                            | 12.7                                            | 0.52      | 571                                                                     | KEO / KY14-05    | 2014.07.27 | 32°20'N-144°30'E     | 50-0         | DF-03 |
|                                      | tap3_cong2            | 627                            | 10.7                                            | 0.55      | 595                                                                     | KS-16-9          | 2016.07.19 | 32°09.7'N-142°04.2'E | Surface      | DF-03 |
|                                      | tap3_cong3            | 349                            | 6.8                                             | 0.56      | 648                                                                     | KS-16-9          | 2016.07.19 | 32°09.7'N-142°04.2'E | Surface      | DF-03 |
|                                      | N150-100_cong5        | 374                            | 4.7                                             | 0.60      | 587                                                                     | KS-16-9          | 2016.07.22 | 27°N-144°E           | 150-100      | DF-03 |
|                                      | N150-100_cong6        | 585                            | 8.9                                             | 0.47      | 447                                                                     | KS-16-9          | 2016.07.22 | 27°N-144°E           | 150-100      | DF-03 |
|                                      | tap7_cong7            | 320                            | 8.8                                             | 0.59      | 566                                                                     | KS-16-9          | 2016.07.20 | 27°N-144°E           | Surface      | DF-03 |
| <i>Globigerinoides ruber</i> (white) |                       |                                |                                                 |           |                                                                         |                  |            |                      |              |       |
|                                      | 1-rub1                | 232                            | 3.0                                             | 0.40      | 402                                                                     | MR14-02          | 2014.02.15 | 8°10'N-134°45'E      | Surface      | DF-03 |
|                                      | 2-rub2                | 250                            | 3.5                                             | 0.44      | 409                                                                     | MR14-02          | 2014.02.16 | 7°32.5'N-134°45'E    | Surface      | DF-03 |
|                                      | 9-rub3                | 429                            | 6.7                                             | 0.31      | 454                                                                     | MR14-02          | 2014.02.19 | 4°35.4'N-144°27.8'E  | Surface      | DF-03 |
|                                      | 34-rub4               | 304                            | 10.8                                            | 0.17      | 352                                                                     | MR14-02          | 2014.03.17 | 25°N-149°12'E        | Surface      | DF-03 |
|                                      | 0713-0006-rub         | 267                            | 2.4                                             | 0.47      | 469                                                                     | MR13-04          | 2013.07.13 | 32°56.8'N-143°59.5'E | Surface      | DF-03 |
|                                      | 0713-0006-rub2        | 444                            | 14.2                                            | 0.48      | 403                                                                     | MR13-04          | 2013.07.13 | 32°56.8'N-143°59.5'E | Surface      | DF-03 |
|                                      | 0713-0006_rub3        | 411                            | 12.1                                            | 0.43      | 415                                                                     | MR13-04          | 2013.07.13 | 32°56.8'N-143°59.5'E | Surface      | DF-03 |
|                                      | 0713-0006_rub4        | 267                            | 8.8                                             | 0.50      | 643                                                                     | MR13-04          | 2013.07.13 | 32°56.8'N-143°59.5'E | Surface      | DF-03 |
|                                      | 0718-0612-rub-kawachi | 178                            | 6.7                                             | 0.50      | 410                                                                     | MR13-04          | 2013.07.18 | 33°53.4'N-145°02.8'E | Surface      | DF-03 |
|                                      | 0718-0006_rub_kawachi | 422                            | 2.3                                             | 0.47      | 503                                                                     | MR13-04          | 2013.07.18 | 32°32.5'N-144°36.4'E | Surface      | DF-03 |
|                                      | 0718-1824_rub         | 310                            | 4.4                                             | 0.49      | 475                                                                     | MR13-04          | 2013.07.18 | 35°35.2'N-145°55.6'E | Surface      | DF-03 |
|                                      | 1-rub1                | 360                            | 15.9                                            | 0.51      | 571                                                                     | Sagami Bay       | 2013.08.05 | 35°10'N-139°11'E     | Surface      | DF-03 |
|                                      | 1-rub2                | 190                            | 1.0                                             | 0.54      | 553                                                                     | Sagami Bay       | 2013.08.05 | 35°10'N-139°11'E     | Surface      | DF-03 |
|                                      | 2-rub1                | 320                            | 4.0                                             | 0.51      | 592                                                                     | Sagami Bay       | 2013.08.05 | 35°10'N-139°11'E     | Surface      | DF-03 |
|                                      | 2-rub2                | 285                            | 6.6                                             | 0.52      | 677                                                                     | Sagami Bay       | 2013.08.05 | 35°10'N-139°11'E     | Surface      | DF-03 |
|                                      | KY14-09_2-rub         | 232                            | 4.3                                             | 0.44      | 483                                                                     | KY14-09          | 2014.06.20 | 30°22.6'N-144°39.5'E | Surface      | DF-03 |
|                                      | KY14-09_2-rub2        | 375                            | 6.5                                             | 0.46      | 574                                                                     | KY14-09          | 2014.06.20 | 30°22.6'N-144°39.5'E | Surface      | DF-03 |
|                                      | tap2_rub2             | 386                            | 4.5                                             | 0.54      | 667                                                                     | KS-16-9          | 2016.07.18 | 32°28.9'N-141°50.2'E | Surface      | DF-03 |
|                                      | tap2_rub3             | 314                            | 4.6                                             | 0.49      | 688                                                                     | KS-16-9          | 2016.07.18 | 32°28.9'N-141°50.2'E | Surface      | DF-03 |
|                                      | tap2_rub4             | 232                            | 1.3                                             | 0.27      | 560                                                                     | KS-16-9          | 2016.07.18 | 32°28.9'N-141°50.2'E | Surface      | DF-03 |
|                                      | tap6_rub7             | 211                            | 1.9                                             | 0.30      | 605                                                                     | KS-16-9          | 2016.07.20 | 27°42.1'N-143°43.1'E | Surface      | DF-03 |
|                                      | Mana_rub2             | 484                            | 5.9                                             | 0.46      | 620                                                                     | Manazuru         | 2016.10.24 | 35°07'N-139°08'E     | Surface      | DF-03 |
|                                      | Mana_rub3             | 314                            | 2.5                                             | 0.47      | 599                                                                     | Manazuru         | 2016.10.24 | 35°07'N-139°08'E     | Surface      | DF-03 |
|                                      | Mana_rub4             | 506                            | 8.3                                             | 0.45      | 466                                                                     | Manazuru         | 2016.10.24 | 35°07'N-139°08'E     | Surface      | DF-03 |
|                                      | Mana_rub5             | 297                            | 1.9                                             | 0.43      | 617                                                                     | Manazuru         | 2016.10.24 | 35°07'N-139°08'E     | Surface      | DF-03 |
|                                      | Mana_rub7             | 351                            | 2.5                                             | 0.52      | 583                                                                     | Manazuru         | 2016.10.24 | 35°07'N-139°08'E     | Surface      | DF-03 |
|                                      | Mana_rub8             | 481                            | 5.0                                             | 0.50      | 543                                                                     | Manazuru         | 2016.10.24 | 35°07'N-139°08'E     | Surface      | DF-03 |
|                                      | mana_rub1             | 321                            | 6.0                                             | 0.53      | 354                                                                     | M1 / Manazuru    | 2017.07.13 | 35°09'N-139°10.5'E   | Surface      | DF-14 |
|                                      | mana_rub2             | 276                            | 5.6                                             | 0.53      | 314                                                                     | M1 / Manazuru    | 2017.07.13 | 35°09'N-139°10.5'E   | Surface      | DF-14 |
|                                      | mana_rub3             | 226                            | 3.3                                             | 0.49      | 313                                                                     | M1 / Manazuru    | 2017.07.13 | 35°09'N-139°10.5'E   | Surface      | DF-14 |
|                                      | Stn22407_rub-w5       | 227                            | 3.4                                             | 0.52      | 424                                                                     | 22407 / M140     | 2017.08.18 | 12°5.8'N-33°47.1'W   | 40-20        | DF-14 |
|                                      | Stn22407_rub-w6       | 216                            | 1.8                                             | 0.53      | 527                                                                     | 22407 / M140     | 2017.08.18 | 12°5.8'N-33°47.1'W   | 40-20        | DF-14 |
|                                      | Stn22407_rub-w7       | 202                            | 1.8                                             | 0.62      | 452                                                                     | 22407 / M140     | 2017.08.18 | 12°5.8'N-33°47.1'W   | 40-20        | DF-14 |
|                                      | Stn22407_rub-w9       | 190                            | 0.9                                             | 0.44      | 495                                                                     | 22407 / M140     | 2017.08.18 | 12°5.8'N-33°47.1'W   | 60-40        | DF-14 |
|                                      | Stn22407_rub-w10      | 250                            | 3.3                                             | 0.56      | 475                                                                     | 22407 / M140     | 2017.08.18 | 12°5.8'N-33°47.1'W   | 60-40        | DF-14 |
|                                      | Stn22407_rub-w11      | 213                            | 2.5                                             | 0.50      | 404                                                                     | 22407 / M140     | 2017.08.18 | 12°5.8'N-33°47.1'W   | 60-40        | DF-14 |
|                                      | Stn22407_rub-w13      | 177                            | 1.0                                             | 0.36      | 376                                                                     | 22407 / M140     | 2017.08.18 | 12°5.8'N-33°47.1'W   | 80-60        | DF-14 |
|                                      | Stn22407_rub-w14      | 209                            | 1.4                                             | 0.44      | 496                                                                     | 22407 / M140     | 2017.08.18 | 12°5.8'N-33°47.1'W   | 80-60        | DF-14 |
|                                      | Stn22407_rub-w15      | 238                            | 1.8                                             | 0.37      | 472                                                                     | 22407 / M140     | 2017.08.18 | 12°5.8'N-33°47.1'W   | 80-60        | DF-14 |
|                                      | Stn22407_rub-w16      | 195                            | 1.5                                             | 0.24      | 388                                                                     | 22407 / M140     | 2017.08.18 | 12°5.8'N-33°47.1'W   | 80-60        | DF-14 |
|                                      | 22417_rub-w17         | 183                            | 3.1                                             | 0.54      | 311                                                                     | 22417 / M140     | 2017.09.03 | 20°52.1'N-18°56.3'W  | 100-80       | DF-14 |
|                                      | 22417_rub-w18_0       | 436                            | 7.5                                             | 0.51      | 365                                                                     | 22417 / M140     | 2017.08.31 | 20°52.1'N-18°56.3'W  | 20-0         | DF-14 |
|                                      | 22417_rub-w19_0       | 339                            | 6.3                                             | 0.47      | 366                                                                     | 22417 / M140     | 2017.08.31 | 20°52.1'N-18°56.3'W  | 40-20        | DF-14 |
|                                      | 22417_rub-w20_0       | 395                            | 8.0                                             | 0.53      | 350                                                                     | 22417 / M140     | 2017.08.31 | 20°52.1'N-18°56.3'W  | 20-0         | DF-14 |
|                                      | 22417_rub-w21_0       | 316                            | 6.5                                             | 0.45      | 341                                                                     | 22417 / M140     | 2017.08.31 | 20°52.1'N-18°56.3'W  | 40-20        | DF-14 |
|                                      | 22417_rub-w23_0       | 246                            | 4.3                                             | 0.53      | 268                                                                     | 22417 / M140     | 2017.08.31 | 20°52.1'N-18°56.3'W  | 60-40        | DF-14 |
|                                      | 22421_rub-w24         | 225                            | 2.7                                             | 0.50      | 327                                                                     | 22421 / M140     | 2017.09.03 | 24°43.7'N-16°34.7'W  | 40-20        | DF-14 |
|                                      | 22421_rub-w25         | 218                            | 3.0                                             | 0.50      | 333                                                                     | 22421 / M140     | 2017.09.03 | 24°43.7'N-16°34.7'W  | 20-0         | DF-14 |
|                                      | 22421_rub-w26         | 238                            | 3.1                                             | 0.55      | 502                                                                     | 22421 / M140     | 2017.09.03 | 24°43.7'N-16°34.7'W  | 20-0         | DF-14 |
|                                      | 22421_rub-w27         | 245                            | ND                                              | -         | -                                                                       | 22421 / M140     | 2017.09.03 | 24°43.7'N-16°34.7'W  | 60-40        | DF-14 |



| Species                             | ID                     | Test size<br>( $\mu\text{m}$ ) | Chl <i>a</i> (ng<br>foraminifer <sup>-1</sup> ) | $F_v/F_n$ | $\sigma_{\text{psl}} (\times 10^{-20} \text{ m}^2 \text{ quanta}^{-1})$ | Station / Cruise | Date       | Latitude-Longitude  | Depth<br>(m) | FRRF  |
|-------------------------------------|------------------------|--------------------------------|-------------------------------------------------|-----------|-------------------------------------------------------------------------|------------------|------------|---------------------|--------------|-------|
| <i>Globigerinoides ruber</i> (pink) |                        |                                |                                                 |           |                                                                         |                  |            |                     |              |       |
|                                     | Stn22407_rub-p2        | 267                            | 2.4                                             | 0.54      | 331                                                                     | 22407 / M140     | 2017.08.18 | 12°5.8'N-33°47.1'W  | 40–20        | DF-14 |
|                                     | Stn22409_rub-p3        | 350                            | 4.5                                             | 0.57      | 318                                                                     | 22409 / M140     | 2017.08.20 | 11°41.3'N-26°39.7'W | 20–0         | DF-14 |
|                                     | Stn22409_rub-p4        | 405                            | 13.3                                            | 0.57      | 380                                                                     | 22409 / M140     | 2017.08.20 | 11°41.3'N-26°39.7'W | 20–0         | DF-14 |
|                                     | Stn22409_rub-p5        | 192                            | 1.8                                             | 0.45      | 378                                                                     | 22409 / M140     | 2017.08.20 | 11°41.3'N-26°39.7'W | 300–200      | DF-14 |
|                                     | Stn22412_rub-p6        | 290                            | 3.8                                             | 0.58      | 194                                                                     | 22412 / M140     | 2017.08.25 | 14°6.4'N-23°44.5'W  | 60–40        | DF-14 |
|                                     | Stn22412_rub-p7        | 377                            | 7.6                                             | 0.53      | 378                                                                     | 22412 / M140     | 2017.08.25 | 14°6.4'N-23°44.5'W  | 60–40        | DF-14 |
|                                     | tap2_rub-p8            | 262                            | 2.3                                             | 0.49      | 318                                                                     | M140             | 2017.08.22 | 11°25.9'N-22°56.6'W | Surface      | DF-14 |
|                                     | PP37_rub-p13           | 287                            | 4.1                                             | 0.55      | 392                                                                     | M140             | 2017.08.25 | 13°10.3'N-23°25.8'W | Surface      | DF-14 |
|                                     | PP37_rub-p14           | 203                            | 0.9                                             | 0.50      | 389                                                                     | M140             | 2017.08.25 | 13°10.3'N-23°25.8'W | Surface      | DF-14 |
|                                     | PP37_rub-p15           | 270                            | 2.7                                             | 0.50      | 286                                                                     | M140             | 2017.08.25 | 13°10.3'N-23°25.8'W | Surface      | DF-14 |
|                                     | PP37_rub-p16           | 253                            | 1.3                                             | 0.51      | 309                                                                     | M140             | 2017.08.25 | 13°10.3'N-23°25.8'W | Surface      | DF-14 |
|                                     | PP37_rub-p17           | 169                            | 1.3                                             | 0.54      | 378                                                                     | M140             | 2017.08.25 | 13°10.3'N-23°25.8'W | Surface      | DF-14 |
|                                     | PP37_rub-p18           | 304                            | 2.4                                             | 0.52      | 349                                                                     | M140             | 2017.08.25 | 13°10.3'N-23°25.8'W | Surface      | DF-14 |
|                                     | PP37_rub-p19           | 295                            | 2.0                                             | 0.47      | 270                                                                     | M140             | 2017.08.25 | 13°10.3'N-23°25.8'W | Surface      | DF-14 |
|                                     | PP37_rub-p20           | 321                            | 8.7                                             | 0.60      | 574                                                                     | M140             | 2017.08.25 | 13°10.3'N-23°25.8'W | Surface      | DF-14 |
|                                     | PP37_rub-p21           | 160                            | 1.1                                             | 0.47      | 373                                                                     | M140             | 2017.08.25 | 13°10.3'N-23°25.8'W | Surface      | DF-14 |
|                                     | PP37_rub-p22           | 295                            | 3.4                                             | 0.50      | 331                                                                     | M140             | 2017.08.25 | 13°10.3'N-23°25.8'W | Surface      | DF-14 |
|                                     | PP37_rub-p23           | 354                            | 3.5                                             | 0.48      | 378                                                                     | M140             | 2017.08.25 | 13°10.3'N-23°25.8'W | Surface      | DF-14 |
|                                     | 22414_rub-p24          | 339                            | 8.4                                             | 0.56      | 415                                                                     | 22414 / M140     | 2017.08.28 | 21°14.3'N-21°2'W    | 20–0         | DF-14 |
|                                     | 22417_rub-p25_0        | 377                            | 6.8                                             | 0.50      | 478                                                                     | 22417 / M140     | 2017.08.31 | 20°52.1'N-18°56.3'W | 20–0         | DF-14 |
|                                     | 22417_rub-p26_0        | 402                            | 6.1                                             | 0.54      | 345                                                                     | 22417 / M140     | 2017.08.31 | 20°52.1'N-18°56.3'W | 40–20        | DF-14 |
|                                     | 22417_rub-p27_0        | 407                            | 6.8                                             | 0.52      | 452                                                                     | 22417 / M140     | 2017.08.31 | 20°52.1'N-18°56.3'W | 20–0         | DF-14 |
|                                     | 22417_rub-p28_0        | 487                            | 10.2                                            | 0.53      | 375                                                                     | 22417 / M140     | 2017.08.31 | 20°52.1'N-18°56.3'W | 40–20        | DF-14 |
|                                     | 22417_rub-p29_0        | 332                            | 4.2                                             | 0.52      | 330                                                                     | 22417 / M140     | 2017.08.31 | 20°52.1'N-18°56.3'W | 20–0         | DF-14 |
|                                     | 22417_rub-p30_0        | 376                            | 7.0                                             | 0.52      | 396                                                                     | 22417 / M140     | 2017.08.31 | 20°52.1'N-18°56.3'W | 40–20        | DF-14 |
|                                     | 22417_rub-p31_0        | 219                            | 4.2                                             | 0.51      | 404                                                                     | 22417 / M140     | 2017.08.31 | 20°52.1'N-18°56.3'W | 60–40        | DF-14 |
|                                     | 22421_rub-p32          | 181                            | 1.4                                             | 0.53      | 381                                                                     | 22421 / M140     | 2017.09.03 | 24°43.7'N-16°34.7'W | 20–0         | DF-14 |
|                                     | 22421_rub-p33          | 179                            | 0.8                                             | 0.65      | 309                                                                     | 22421 / M140     | 2017.09.03 | 24°43.7'N-16°34.7'W | 20–0         | DF-14 |
|                                     | 22421_rub-p34          | 238                            | 1.9                                             | 0.45      | 346                                                                     | 22421 / M140     | 2017.09.03 | 24°43.7'N-16°34.7'W | 40–20        | DF-14 |
|                                     | 22421_rub-p35          | 213                            | 2.6                                             | 0.53      | 421                                                                     | 22421 / M140     | 2017.09.03 | 24°43.7'N-16°34.7'W | 40–20        | DF-14 |
|                                     | 22421_rub-p36          | 173                            | 0.8                                             | 0.54      | 446                                                                     | 22421 / M140     | 2017.09.03 | 24°43.7'N-16°34.7'W | 40–20        | DF-14 |
|                                     | 22421_rub-p37          | 289                            | 3.1                                             | 0.52      | 359                                                                     | 22421 / M140     | 2017.09.03 | 24°43.7'N-16°34.7'W | 20–0         | DF-14 |
|                                     | 22421_rub-p38          | 209                            | 1.6                                             | 0.39      | 298                                                                     | 22421 / M140     | 2017.09.03 | 24°43.7'N-16°34.7'W | 20–0         | DF-14 |
|                                     | 22421_rub-p39          | 209                            | ND                                              | –         | –                                                                       | 22421 / M140     | 2017.09.03 | 24°43.7'N-16°34.7'W | 40–20        | DF-14 |
|                                     | 22421_rub-p40          | 252                            | 3.0                                             | 0.50      | 405                                                                     | 22421 / M140     | 2017.09.03 | 24°43.7'N-16°34.7'W | 40–20        | DF-14 |
|                                     | 22421_rub-p41          | 207                            | 0.8                                             | –         | –                                                                       | 22421 / M140     | 2017.09.03 | 24°43.7'N-16°34.7'W | 40–20        | DF-14 |
|                                     | 22421_rub-p42          | 301                            | 2.6                                             | 0.50      | 286                                                                     | 22421 / M140     | 2017.09.03 | 24°43.7'N-16°34.7'W | 20–0         | DF-14 |
|                                     | 22421_rub-p43          | 252                            | 2.3                                             | 0.46      | 293                                                                     | 22421 / M140     | 2017.09.03 | 24°43.7'N-16°34.7'W | 20–0         | DF-14 |
|                                     | 22421_rub-p45          | 191                            | 1.4                                             | 0.44      | 347                                                                     | 22421 / M140     | 2017.09.03 | 24°43.7'N-16°34.7'W | 20–0         | DF-14 |
|                                     | 22421_rub-p46          | 282                            | 2.9                                             | 0.50      | 374                                                                     | 22421 / M140     | 2017.09.03 | 24°43.7'N-16°34.7'W | 40–20        | DF-14 |
|                                     | 22421_rub-p47          | 198                            | 1.5                                             | 0.52      | 377                                                                     | 22421 / M140     | 2017.09.03 | 24°43.7'N-16°34.7'W | 40–20        | DF-14 |
|                                     | 22421_rub-p48          | 252                            | 1.8                                             | –         | –                                                                       | 22421 / M140     | 2017.09.03 | 24°43.7'N-16°34.7'W | 40–20        | DF-14 |
|                                     | 22421_rub-p49          | 278                            | 2.5                                             | 0.47      | 400                                                                     | 22421 / M140     | 2017.09.03 | 24°43.7'N-16°34.7'W | 60–40        | DF-14 |
|                                     | 22421_rub-p50          | 281                            | 1.4                                             | 0.56      | 325                                                                     | 22421 / M140     | 2017.09.03 | 24°43.7'N-16°34.7'W | 60–40        | DF-14 |
| <i>Globoturborotalita rubescens</i> |                        |                                |                                                 |           |                                                                         |                  |            |                     |              |       |
|                                     | S1-100-50-c3_rubes1    | 143                            | 0.6                                             | 0.47      | 559                                                                     | S1 / KY14-09     | 2014.07.22 | 30°N-145°E          | 100–50       | DF-03 |
|                                     | S1-50-0-c4_rubes2      | 196                            | 0.9                                             | 0.40      | 421                                                                     | S1 / KY14-09     | 2014.07.22 | 30°N-145°E          | 50–0         | DF-03 |
|                                     | S1-300-200-c4_rubes3   | 143                            | 0.3                                             | 0.26      | 419                                                                     | S1 / KY14-09     | 2014.07.22 | 30°N-145°E          | 300–200      | DF-03 |
|                                     | S1-300-200-c4_rubes4   | 143                            | 0.8                                             | 0.43      | 586                                                                     | S1 / KY14-09     | 2014.07.22 | 30°N-145°E          | 300–200      | DF-03 |
|                                     | S1-300-200-c4_rubes5   | 125                            | 0.5                                             | 0.43      | 500                                                                     | S1 / KY14-09     | 2014.07.22 | 30°N-145°E          | 300–200      | DF-03 |
|                                     | S1-300-200-c3_rubes6   | 107                            | 0.4                                             | 0.32      | 354                                                                     | S1 / KY14-09     | 2014.07.22 | 30°N-145°E          | 300–200      | DF-03 |
|                                     | S1-300-200-c3_rubes7   | 125                            | 0.5                                             | 0.46      | 487                                                                     | S1 / KY14-09     | 2014.07.22 | 30°N-145°E          | 300–200      | DF-03 |
|                                     | S1-300-200-c3_rubes8   | 89                             | 0.5                                             | 0.40      | 519                                                                     | S1 / KY14-09     | 2014.07.22 | 30°N-145°E          | 300–200      | DF-03 |
|                                     | KEO-50-0-c2_rubes9     | 143                            | 0.6                                             | 0.55      | 420                                                                     | KEO / KY14-09    | 2014.07.27 | 32°20'N-144°30'E    | 50–0         | DF-03 |
|                                     | KEO-300-200-c2_rubes10 | 125                            | 0.5                                             | 0.46      | 399                                                                     | KEO / KY14-09    | 2014.07.27 | 32°20'N-144°30'E    | 300–200      | DF-03 |
|                                     | Stn22406_rubes2        | 112                            | 0.4                                             | 0.61      | 492                                                                     | 22406 / M140     | 2017.08.17 | 12°18.6'N-36°56.6'W | 40–20        | DF-14 |
|                                     | Stn22406_rubes3        | 125                            | 0.5                                             | –         | –                                                                       | 22406 / M140     | 2017.08.17 | 12°18.6'N-36°56.6'W | 40–20        | DF-14 |
|                                     | Stn22407_rubes4        | 158                            | 0.6                                             | 0.50      | 516                                                                     | 22407 / M140     | 2017.08.18 | 12°5.8'N-33°47.1'W  | 60–40        | DF-14 |
|                                     | Stn22408_rubes5        | 86                             | 0.4                                             | –         | –                                                                       | 22408 / M140     | 2017.08.19 | 11°52.8'N-30°22.3'W | 60–40        | DF-14 |
|                                     | Stn22408_rubes6        | 247                            | 1.3                                             | 0.51      | 477                                                                     | 22408 / M140     | 2017.08.19 | 11°52.8'N-30°22.3'W | 40–20        | DF-14 |
|                                     | Stn22408_rubes7        | 120                            | 0.7                                             | 0.41      | 175                                                                     | 22408 / M140     | 2017.08.19 | 11°52.8'N-30°22.3'W | 40–20        | DF-14 |

| Species                                  | ID                     | Test size<br>( $\mu\text{m}$ ) | Chl <i>a</i> (ng<br>foraminifer <sup>-1</sup> ) | $F_v/F_n$ | $\sigma_{\text{psl}} (\times 10^{-20} \text{ m}^2 \text{ quanta}^{-1})$ | Station / Cruise | Date       | Latitude-Longitude   | Depth<br>(m) | FRRf  |
|------------------------------------------|------------------------|--------------------------------|-------------------------------------------------|-----------|-------------------------------------------------------------------------|------------------|------------|----------------------|--------------|-------|
|                                          | Stn22408_rubes8        | 182                            | 1.3                                             | 0.50      | 388                                                                     | 22408 / M140     | 2017.08.19 | 11°52.8'N-30°22.3'W  | 40–20        | DF-14 |
|                                          | Stn22408_rubes9        | 111                            | 0.5                                             | –         | –                                                                       | 22408 / M140     | 2017.08.19 | 11°52.8'N-30°22.3'W  | 40–20        | DF-14 |
|                                          | Stn22409_rubes10       | 231                            | 1.1                                             | 0.49      | 407                                                                     | 22409 / M140     | 2017.08.20 | 11°41.3'N-26°39.7'W  | 40–20        | DF-14 |
|                                          | 22417_rubes11          | 179                            | 2.0                                             | –         | –                                                                       | 22417 / M140     | 2017.08.31 | 20°52.1'N-18°56.3'W  | 100–80       | DF-14 |
|                                          | 22417_rubes12          | 157                            | 0.6                                             | 0.43      | 383                                                                     | 22417 / M140     | 2017.08.31 | 20°52.1'N-18°56.3'W  | 100–80       | DF-14 |
|                                          | 22421_rubes13          | 165                            | 0.9                                             | 0.46      | 227                                                                     | 22421 / M140     | 2017.09.03 | 24°43.7'N-16°34.7'W  | 20–0         | DF-14 |
|                                          | 22421_rubes14          | 123                            | 0.5                                             | –         | –                                                                       | 22421 / M140     | 2017.09.03 | 24°43.7'N-16°34.7'W  | 20–0         | DF-14 |
|                                          | 22421_rubes15          | 148                            | 0.6                                             | 0.30      | 388                                                                     | 22421 / M140     | 2017.09.03 | 24°43.7'N-16°34.7'W  | 20–0         | DF-14 |
|                                          | 22421_rubes16          | 162                            | 0.9                                             | 0.44      | 166                                                                     | 22421 / M140     | 2017.09.03 | 24°43.7'N-16°34.7'W  | 20–0         | DF-14 |
|                                          | 22421_rubes17          | 135                            | 0.5                                             | –         | –                                                                       | 22421 / M140     | 2017.09.03 | 24°43.7'N-16°34.7'W  | 20–0         | DF-14 |
|                                          | 22421_rubes18          | 204                            | 1.1                                             | 0.28      | 268                                                                     | 22421 / M140     | 2017.09.03 | 24°43.7'N-16°34.7'W  | 40–20        | DF-14 |
|                                          | 22421_rubes19          | 158                            | 1.2                                             | 0.40      | 321                                                                     | 22421 / M140     | 2017.09.03 | 24°43.7'N-16°34.7'W  | 80–60        | DF-14 |
| <i>Globoturborotalita tenella</i>        |                        |                                |                                                 |           |                                                                         |                  |            |                      |              |       |
|                                          | 0719-1218_tene         | 233                            | 1.9                                             | 0.47      | 383                                                                     | MR13-04          | 2013.07.19 | 39°02'N-147°53.3'E   | Surface      | DF-03 |
|                                          | 0720-0612_tene         | 200                            | 2.4                                             | –         | –                                                                       | MR13-04          | 2013.07.20 | 42°N-152°33'E        | Surface      | DF-03 |
|                                          | tap3_tene1             | 323                            | 3.4                                             | 0.55      | 537                                                                     | KS-16-9          | 2016.07.19 | 32°09.7'N-142°04.2'E | Surface      | DF-03 |
|                                          | tap4_tene2             | 282                            | 0.2                                             | –         | –                                                                       | KS-16-9          | 2016.07.19 | 31°17.1'N-142°25.3'E | Surface      | DF-03 |
|                                          | 22421_tene2            | 221                            | 1.7                                             | 0.51      | 634                                                                     | 22421 / M140     | 2017.09.03 | 24°43.7'N-16°34.7'W  | 60–40        | DF-14 |
|                                          | 22421_tene3            | 146                            | 0.8                                             | –         | –                                                                       | 22421 / M140     | 2017.09.03 | 24°43.7'N-16°34.7'W  | 20–0         | DF-14 |
|                                          | 22421_tene4            | 155                            | 1.5                                             | 0.63      | 480                                                                     | 22421 / M140     | 2017.09.03 | 24°43.7'N-16°34.7'W  | 20–0         | DF-14 |
|                                          | 22421_tene5            | 189                            | 1.9                                             | 0.53      | 309                                                                     | 22421 / M140     | 2017.09.03 | 24°43.7'N-16°34.7'W  | 20–0         | DF-14 |
|                                          | 22421_tene6            | 168                            | 1.5                                             | 0.55      | 464                                                                     | 22421 / M140     | 2017.09.03 | 24°43.7'N-16°34.7'W  | 20–0         | DF-14 |
|                                          | 22421_tene7            | 183                            | 1.4                                             | 0.49      | 410                                                                     | 22421 / M140     | 2017.09.03 | 24°43.7'N-16°34.7'W  | 40–20        | DF-14 |
|                                          | 22421_tene8            | 167                            | 0.9                                             | 0.48      | 243                                                                     | 22421 / M140     | 2017.09.03 | 24°43.7'N-16°34.7'W  | 40–20        | DF-14 |
|                                          | 22421_tene9            | 199                            | 1.6                                             | 0.50      | 348                                                                     | 22421 / M140     | 2017.09.03 | 24°43.7'N-16°34.7'W  | 60–40        | DF-14 |
|                                          | 22421_tene10           | 128                            | 1.2                                             | 0.37      | 432                                                                     | 22421 / M140     | 2017.09.03 | 24°43.7'N-16°34.7'W  | 60–40        | DF-14 |
| <i>Globigerinella calida</i>             |                        |                                |                                                 |           |                                                                         |                  |            |                      |              |       |
|                                          | RM1_calida1            | 694                            | 2.2                                             | 0.43      | 633                                                                     | RM1 / KH-16-7    | 2016.12.21 | 25°49'N-126°55'E     | 100–0        | DF-03 |
|                                          | RM1_calida2            | 709                            | 0.1                                             | –         | –                                                                       | RM1 / KH-16-7    | 2016.12.21 | 25°49'N-126°55'E     | 100–0        | DF-03 |
|                                          | 100-50D_calida3        | 383                            | 3.2                                             | 0.30      | 538                                                                     | KS-16-9          | 2016.07.21 | 27°N-144°E           | 100–50       | DF-03 |
|                                          | 100-50D_calida4        | 357                            | 1.9                                             | 0.47      | 757                                                                     | KS-16-9          | 2016.07.21 | 27°N-144°E           | 100–50       | DF-03 |
|                                          | Mana_calida1           | 302                            | 1.9                                             | 0.41      | 398                                                                     | Manazuru         | 2016.10.24 | 35°07'N-139°08'E     | Surface      | DF-03 |
|                                          | Mana_calida2           | 442                            | 2.6                                             | 0.44      | 585                                                                     | Manazuru         | 2016.10.24 | 35°07'N-139°08'E     | Surface      | DF-03 |
|                                          | St22403_calida7        | 335                            | 6.9                                             | 0.48      | 737                                                                     | 22403 / M140     | 2017.08.13 | 14°47.4'N-32°31.1'W  | 100–80       | DF-14 |
|                                          | St22403_calida9        | 328                            | 7.2                                             | 0.54      | 492                                                                     | 22403 / M140     | 2017.08.13 | 14°47.4'N-32°31.1'W  | 40–20        | DF-14 |
|                                          | Stn22407_calida10      | 309                            | 1.8                                             | 0.49      | 399                                                                     | 22407 / M140     | 2017.08.18 | 12°5.8'N-33°47.1'W   | 20–0         | DF-14 |
|                                          | Stn22408_calida11      | 293                            | 0.2                                             | –         | –                                                                       | 22408 / M140     | 2017.08.19 | 11°52.8'N-30°22.3'W  | 100–80       | DF-14 |
|                                          | Stn22408_calida12      | 212                            | 0.1                                             | –         | –                                                                       | 22408 / M140     | 2017.08.19 | 11°52.8'N-30°22.3'W  | 100–80       | DF-14 |
|                                          | Stn22408_calida13      | 242                            | 0.3                                             | –         | –                                                                       | 22408 / M140     | 2017.08.19 | 11°52.8'N-30°22.3'W  | 100–80       | DF-14 |
|                                          | Stn22408_calida14      | 362                            | 0.3                                             | –         | –                                                                       | 22408 / M140     | 2017.08.19 | 11°52.8'N-30°22.3'W  | 100–80       | DF-14 |
|                                          | Stn22408_calida15      | 400                            | 0.3                                             | –         | –                                                                       | 22408 / M140     | 2017.08.19 | 11°52.8'N-30°22.3'W  | 100–80       | DF-14 |
|                                          | Stn22412_siph16_calida | 376                            | 4.0                                             | 0.44      | 616                                                                     | 22412 / M140     | 2017.08.25 | 14°6.4'N-23°44.5'W   | 100–80       | DF-14 |
|                                          | St17_calida1_0         | 270                            | 2.8                                             | 0.37      | 444                                                                     | St17 / KH-17-4   | 2017.10.01 | 23°N-137°E           | 100–0        | DF-14 |
|                                          | St17_calida2_0         | 582                            | 20.5                                            | 0.49      | 462                                                                     | St17 / KH-17-4   | 2017.10.01 | 23°N-137°E           | 100–0        | DF-14 |
|                                          | St17_calida3           | 371                            | 8.3                                             | 0.37      | 389                                                                     | St17 / KH-17-4   | 2017.10.01 | 23°N-137°E           | 100–0        | DF-14 |
|                                          | St17_calida4           | 304                            | 1.1                                             | –         | –                                                                       | St17 / KH-17-4   | 2017.10.01 | 23°N-137°E           | 100–0        | DF-14 |
| <i>Globigerinella siphonifera</i> Type 1 |                        |                                |                                                 |           |                                                                         |                  |            |                      |              |       |
|                                          | 4-siph2                | 304                            | 3.9                                             | 0.44      | 642                                                                     | MR14-02          | 2014.02.16 | 6°40'N-138°55'E      | Surface      | DF-03 |
|                                          | 5-siph2                | 232                            | 5.7                                             | 0.35      | 414                                                                     | MR14-02          | 2014.02.17 | 5°43.2'N-139°43.3'E  | Surface      | DF-03 |
|                                          | 9-siph4                | 714                            | 29.6                                            | 0.49      | 595                                                                     | MR14-02          | 2014.02.19 | 4°35.4'N-144°27.8'E  | Surface      | DF-03 |
|                                          | 20-siph14              | 357                            | 5.1                                             | 0.47      | 428                                                                     | MR14-02          | 2014.03.01 | 3°S-156°E            | Surface      | DF-03 |
|                                          | 20-siph15              | 375                            | 10.0                                            | 0.45      | 536                                                                     | MR14-02          | 2014.03.01 | 3°S-156°E            | Surface      | DF-03 |
|                                          | 20-siph16              | 357                            | 13.5                                            | 0.49      | 500                                                                     | MR14-02          | 2014.03.01 | 3°S-156°E            | Surface      | DF-03 |
|                                          | 22-siph17              | 393                            | 10.8                                            | 0.46      | 509                                                                     | MR14-02          | 2014.03.03 | 0°30'S-156°E         | Surface      | DF-03 |
|                                          | 22-siph18              | 411                            | 11.6                                            | 0.48      | 471                                                                     | MR14-02          | 2014.03.03 | 0°30'S-156°E         | Surface      | DF-03 |
|                                          | 22-siph19              | 429                            | 2.8                                             | 0.40      | 450                                                                     | MR14-02          | 2014.03.03 | 0°30'S-156°E         | Surface      | DF-03 |
|                                          | 29-siph21              | 304                            | 3.4                                             | 0.45      | 593                                                                     | MR14-02          | 2014.03.12 | 7°58'N-156°2'E       | Surface      | DF-03 |
|                                          | SSK_siph2              | 464                            | 24.1                                            | 0.46      | 507                                                                     | Sesoko           | 2013.11.29 | 26°37.3'N-127°52.3'E | Surface      | DF-03 |
|                                          | SSK_siph5              | 357                            | 16.5                                            | 0.47      | 530                                                                     | Sesoko           | 2013.11.29 | 26°37.3'N-127°52.3'E | Surface      | DF-03 |
|                                          | SSK_siph7              | 375                            | 9.2                                             | 0.32      | 520                                                                     | Sesoko           | 2013.11.29 | 26°37.3'N-127°52.3'E | Surface      | DF-03 |
|                                          | SSK_siph9              | 446                            | 42.7                                            | 0.43      | 718                                                                     | Sesoko           | 2013.11.29 | 26°37.3'N-127°52.3'E | Surface      | DF-03 |

| Species | ID                | Test size<br>( $\mu\text{m}$ ) | Chl <i>a</i> (ng<br>foraminifer <sup>-1</sup> ) | $F_v/F_n$ | $\sigma_{\text{psl}} (\times 10^{-20} \text{ m}^2 \text{ quanta}^{-1})$ | Station / Cruise | Date       | Latitude-Longitude   | Depth<br>(m) | FRRf  |
|---------|-------------------|--------------------------------|-------------------------------------------------|-----------|-------------------------------------------------------------------------|------------------|------------|----------------------|--------------|-------|
|         | SSK_siph13        | 375                            | 3.4                                             | 0.40      | 439                                                                     | Sesoko           | 2013.11.29 | 26°37.3'N-127°52.3'E | Surface      | DF-03 |
|         | Mana_siph11       | 509                            | 7.6                                             | 0.46      | 598                                                                     | Manazuru         | 2016.10.24 | 35°07'N-139°08'E     | Surface      | DF-03 |
|         | N01-50-20_siph12  | 360                            | 2.3                                             | 0.38      | 454                                                                     | N01 / KH-16-7    | 2016.12.09 | 24°N-147°E           | 50–20        | DF-03 |
|         | N01-50-20_siph13  | 320                            | 3.4                                             | 0.41      | 550                                                                     | N01 / KH-16-7    | 2016.12.09 | 24°N-147°E           | 50–20        | DF-03 |
|         | N01-50-20_siph14  | 312                            | 2.0                                             | 0.42      | 543                                                                     | N01 / KH-16-7    | 2016.12.09 | 24°N-147°E           | 50–20        | DF-03 |
|         | N01-20-0_siph15   | 521                            | 19.6                                            | 0.43      | 664                                                                     | N01 / KH-16-7    | 2016.12.09 | 24°N-147°E           | 20–0         | DF-03 |
|         | N01-20-0_siph16   | 438                            | 10.6                                            | 0.23      | 408                                                                     | N01 / KH-16-7    | 2016.12.09 | 24°N-147°E           | 20–0         | DF-03 |
|         | N01-50-20_siph17  | 487                            | 16.0                                            | 0.42      | 560                                                                     | N01 / KH-16-7    | 2016.12.09 | 24°N-147°E           | 50–20        | DF-03 |
|         | N01-50-20_siph110 | 394                            | 8.8                                             | 0.42      | 646                                                                     | N01 / KH-16-7    | 2016.12.09 | 24°N-147°E           | 50–20        | DF-03 |
|         | N01-20-0_siph112  | 370                            | 4.5                                             | 0.44      | 679                                                                     | N01 / KH-16-7    | 2016.12.09 | 24°N-147°E           | 20–0         | DF-03 |
|         | Stn22406_siph7    | 565                            | 0.3                                             | –         | –                                                                       | 22406 / M140     | 2017.08.17 | 12°18.6'N-36°56.6'W  | 100–80       | DF-14 |
|         | Stn22406_siph8    | 436                            | 13.2                                            | 0.47      | 622                                                                     | 22406 / M140     | 2017.08.17 | 12°18.6'N-36°56.6'W  | 100–80       | DF-14 |
|         | Stn22406_siph14   | 417                            | 0.2                                             | –         | –                                                                       | 22406 / M140     | 2017.08.17 | 12°18.6'N-36°56.6'W  | 200–100      | DF-14 |
|         | Stn22407_siph15   | 466                            | 8.6                                             | 0.53      | 552                                                                     | 22407 / M140     | 2017.08.18 | 12°5.8'N-33°47.1'W   | 60–40        | DF-14 |
|         | Stn22412_siph17   | 323                            | 1.5                                             | 0.24      | 308                                                                     | 22412 / M140     | 2017.08.25 | 14°6.4'N-23°44.5'W   | 100–80       | DF-14 |
|         | Stn22412_siph19   | 328                            | 2.3                                             | 0.48      | 497                                                                     | 22412 / M140     | 2017.08.25 | 14°6.4'N-23°44.5'W   | 80–60        | DF-14 |
|         | Stn22412_siph20   | 295                            | 0.3                                             | –         | –                                                                       | 22412 / M140     | 2017.08.25 | 14°6.4'N-23°44.5'W   | 100–80       | DF-14 |
|         | Stn22412_siph21   | 289                            | 1.1                                             | 0.45      | 664                                                                     | 22412 / M140     | 2017.08.25 | 14°6.4'N-23°44.5'W   | 100–80       | DF-14 |
|         | Stn22412_siph22   | 450                            | 0.2                                             | –         | –                                                                       | 22412 / M140     | 2017.08.25 | 14°6.4'N-23°44.5'W   | 60–40        | DF-14 |
|         | Stn22412_siph23   | 356                            | 0.1                                             | –         | –                                                                       | 22412 / M140     | 2017.08.25 | 14°6.4'N-23°44.5'W   | 60–40        | DF-14 |
|         | 22417_siph28      | 309                            | 3.5                                             | 0.57      | 382                                                                     | 22417 / M140     | 2017.08.31 | 20°52.1'N-18°56.3'W  | 60–40        | DF-14 |
|         | 22417_siph29_0    | 444                            | 13.4                                            | 0.54      | 534                                                                     | 22417 / M140     | 2017.08.31 | 20°52.1'N-18°56.3'W  | 20–0         | DF-14 |
|         | 22421_siph30      | 330                            | 2.5                                             | 0.51      | 352                                                                     | 22421 / M140     | 2017.09.03 | 24°43.7'N-16°34.7'W  | 20–0         | DF-14 |
|         | 22421_siph31      | 197                            | 0.3                                             | –         | –                                                                       | 22421 / M140     | 2017.09.03 | 24°43.7'N-16°34.7'W  | 60–40        | DF-14 |
|         | St11_siph11_0     | 498                            | 26.0                                            | 0.47      | 554                                                                     | St11 / KH-17-4   | 2017.09.12 | 21°30'N-170°W        | 50–20        | DF-14 |
|         | St11_siph12_0     | 582                            | 15.5                                            | 0.50      | 364                                                                     | St11 / KH-17-4   | 2017.09.12 | 21°30'N-170°W        | 50–20        | DF-14 |
|         | St11_siph13       | 520                            | 2.2                                             | –         | –                                                                       | St11 / KH-17-4   | 2017.09.12 | 21°30'N-170°W        | 100–0        | DF-14 |
|         | St11_siph14       | 538                            | 33.0                                            | 0.52      | 457                                                                     | St11 / KH-17-4   | 2017.09.12 | 21°30'N-170°W        | 100–0        | DF-14 |
|         | St11_siph15       | 532                            | 12.4                                            | 0.51      | 504                                                                     | St11 / KH-17-4   | 2017.09.12 | 21°30'N-170°W        | 100–0        | DF-14 |
|         | St11_siph16       | 515                            | 15.0                                            | 0.52      | 408                                                                     | St11 / KH-17-4   | 2017.09.12 | 21°30'N-170°W        | 100–0        | DF-14 |
|         | St11_siph17       | 480                            | 8.5                                             | 0.49      | 338                                                                     | St11 / KH-17-4   | 2017.09.12 | 21°30'N-170°W        | 100–0        | DF-14 |
|         | St11_siph18       | 467                            | 9.1                                             | 0.52      | 363                                                                     | St11 / KH-17-4   | 2017.09.12 | 21°30'N-170°W        | 100–0        | DF-14 |
|         | St11_siph19       | 658                            | 1.8                                             | –         | –                                                                       | St11 / KH-17-4   | 2017.09.12 | 21°30'N-170°W        | 100–0        | DF-14 |
|         | St11_siph110      | 398                            | 15.5                                            | 0.51      | 404                                                                     | St11 / KH-17-4   | 2017.09.12 | 21°30'N-170°W        | 100–0        | DF-14 |
|         | St11_siph111      | 476                            | 13.2                                            | 0.50      | 349                                                                     | St11 / KH-17-4   | 2017.09.12 | 21°30'N-170°W        | 100–0        | DF-14 |
|         | St11_siph112      | 456                            | 11.2                                            | 0.51      | 396                                                                     | St11 / KH-17-4   | 2017.09.12 | 21°30'N-170°W        | 100–0        | DF-14 |
|         | St11_siph113      | 532                            | 0.2                                             | –         | –                                                                       | St11 / KH-17-4   | 2017.09.12 | 21°30'N-170°W        | 100–0        | DF-14 |
|         | St12_siph114      | 401                            | 17.4                                            | 0.50      | 522                                                                     | St12 / KH-17-4   | 2017.09.16 | 23°N-180°E/W         | 100–0        | DF-14 |
|         | St12_siph115      | 494                            | 11.4                                            | 0.44      | 450                                                                     | St12 / KH-17-4   | 2017.09.16 | 23°N-180°E/W         | 100–0        | DF-14 |
|         | St12_siph116      | 407                            | 8.4                                             | 0.46      | 317                                                                     | St12 / KH-17-4   | 2017.09.16 | 23°N-180°E/W         | 100–0        | DF-14 |
|         | St12_siph117      | 460                            | 5.0                                             | 0.49      | 408                                                                     | St12 / KH-17-4   | 2017.09.16 | 23°N-180°E/W         | 100–0        | DF-14 |
|         | St12_siph118      | 574                            | 1.4                                             | 0.32      | 515                                                                     | St12 / KH-17-4   | 2017.09.16 | 23°N-180°E/W         | 100–0        | DF-14 |
|         | St12_siph119      | 281                            | 8.1                                             | 0.54      | 479                                                                     | St12 / KH-17-4   | 2017.09.16 | 23°N-180°E/W         | 100–0        | DF-14 |
|         | St12_siph120      | 393                            | 5.0                                             | 0.53      | 614                                                                     | St12 / KH-17-4   | 2017.09.16 | 23°N-180°E/W         | 100–0        | DF-14 |
|         | St12_siph121      | 604                            | 4.3                                             | 0.44      | 687                                                                     | St12 / KH-17-4   | 2017.09.16 | 23°N-180°E/W         | 100–0        | DF-14 |
|         | St12_siph122      | 468                            | 3.2                                             | 0.50      | 783                                                                     | St12 / KH-17-4   | 2017.09.16 | 23°N-180°E/W         | 100–0        | DF-14 |
|         | St12_siph123      | 759                            | 0.3                                             | –         | –                                                                       | St12 / KH-17-4   | 2017.09.16 | 23°N-180°E/W         | 100–0        | DF-14 |
|         | St12_siph124      | 776                            | 0.3                                             | –         | –                                                                       | St12 / KH-17-4   | 2017.09.16 | 23°N-180°E/W         | 150–100      | DF-14 |
|         | St12_siph125      | 878                            | 0.4                                             | –         | –                                                                       | St12 / KH-17-4   | 2017.09.16 | 23°N-180°E/W         | 150–100      | DF-14 |
|         | St12_siph126      | 793                            | 0.2                                             | –         | –                                                                       | St12 / KH-17-4   | 2017.09.16 | 23°N-180°E/W         | 150–100      | DF-14 |
|         | St12_siph129      | 709                            | 0.1                                             | –         | –                                                                       | St12 / KH-17-4   | 2017.09.16 | 23°N-180°E/W         | 200–150      | DF-14 |
|         | St12_siph130      | 683                            | 0.2                                             | –         | –                                                                       | St12 / KH-17-4   | 2017.09.16 | 23°N-180°E/W         | 200–150      | DF-14 |
|         | St12_siph131      | 548                            | 3.7                                             | 0.43      | 548                                                                     | St12 / KH-17-4   | 2017.09.16 | 23°N-180°E/W         | 200–150      | DF-14 |
|         | St12_siph132      | 473                            | 2.9                                             | 0.46      | 644                                                                     | St12 / KH-17-4   | 2017.09.16 | 23°N-180°E/W         | 100–50       | DF-14 |
|         | St12_siph133      | 726                            | 21.4                                            | 0.46      | 610                                                                     | St12 / KH-17-4   | 2017.09.16 | 23°N-180°E/W         | 50–20        | DF-14 |
|         | St14_siph134      | 471                            | 14.0                                            | 0.55      | 566                                                                     | St14 / KH-17-4   | 2017.09.23 | 23°N-160°E           | 100–0        | DF-14 |
|         | St14_siph135      | 466                            | 18.4                                            | 0.54      | 592                                                                     | St14 / KH-17-4   | 2017.09.23 | 23°N-160°E           | 100–0        | DF-14 |
|         | St14_siph136      | 328                            | 12.4                                            | 0.52      | 545                                                                     | St14 / KH-17-4   | 2017.09.23 | 23°N-160°E           | 100–0        | DF-14 |
|         | St14_siph137      | 470                            | 9.8                                             | 0.53      | 510                                                                     | St14 / KH-17-4   | 2017.09.23 | 23°N-160°E           | 100–0        | DF-14 |
|         | St14_siph138      | 363                            | 9.6                                             | 0.53      | 742                                                                     | St14 / KH-17-4   | 2017.09.23 | 23°N-160°E           | 100–0        | DF-14 |
|         | St14_siph139      | 318                            | 11.8                                            | 0.55      | 654                                                                     | St14 / KH-17-4   | 2017.09.23 | 23°N-160°E           | 100–0        | DF-14 |
|         | St17_siph140_0    | 557                            | 24.2                                            | 0.50      | 494                                                                     | St17 / KH-17-4   | 2017.10.01 | 23°N-137°E           | 100–0        | DF-14 |
|         | St17_siph41_0     | 675                            | 13.2                                            | 0.51      | 427                                                                     | St17 / KH-17-4   | 2017.10.01 | 23°N-137°E           | 100–0        | DF-14 |

| Species                                   | ID                   | Test size<br>( $\mu\text{m}$ ) | Chl <i>a</i> (ng<br>foraminifer <sup>-1</sup> ) | $F_v/F_n$ | $\sigma_{\text{psl}} (\times 10^{-20} \text{ m}^2 \text{ quanta}^{-1})$ | Station / Cruise | Date       | Latitude-Longitude   | Depth<br>(m) | FRRf  |
|-------------------------------------------|----------------------|--------------------------------|-------------------------------------------------|-----------|-------------------------------------------------------------------------|------------------|------------|----------------------|--------------|-------|
| <i>Globigerinella siphonifera</i> Type II |                      |                                |                                                 |           |                                                                         |                  |            |                      |              |       |
|                                           | 0713-0006-siph       | 389                            | 3.2                                             | 0.45      | 568                                                                     | MR13-04          | 2013.07.13 | 32°56.8'N-143°59.5'E | Surface      | DF-03 |
|                                           | 0713-0612-siph       | 477                            | 5.2                                             | 0.45      | 559                                                                     | MR13-04          | 2013.07.13 | 31°44.5'E-144°27.5'E | Surface      | DF-03 |
|                                           | 0713-0612-siph2      | 278                            | 1.8                                             | 0.41      | 631                                                                     | MR13-04          | 2013.07.13 | 31°44.5'E-144°27.5'E | Surface      | DF-03 |
|                                           | S1-0-100_siph-small  | 222                            | 3.5                                             | 0.44      | 852                                                                     | S1 / MR13-04     | 2013.07.13 | 30°N-145°E           | 100-0        | DF-03 |
|                                           | S1-0-100_siph-black  | 490                            | 83.3                                            | 0.42      | 881                                                                     | S1 / MR13-04     | 2013.07.13 | 30°N-145°E           | 100-0        | DF-03 |
|                                           | S1_20-50_siph        | 277                            | 4.5                                             | 0.45      | 642                                                                     | S1 / MR13-04     | 2013.07.13 | 30°N-145°E           | 50-20        | DF-03 |
|                                           | S1_25-75-3_siph      | 566                            | 11.0                                            | 0.48      | 498                                                                     | S1 / MR13-04     | 2013.07.14 | 30°N-145°E           | 75-25        | DF-03 |
|                                           | 2-siph1              | 214                            | 1.7                                             | 0.40      | 587                                                                     | MR14-02          | 2014.02.16 | 7°32.5'N-134°45'E    | Surface      | DF-03 |
|                                           | 8-siph3              | 286                            | 1.9                                             | 0.48      | 605                                                                     | MR14-02          | 2014.02.18 | 4°13.7'N-142°53.9'E  | Surface      | DF-03 |
|                                           | 9-siph5              | 554                            | 22.3                                            | 0.48      | 729                                                                     | MR14-02          | 2014.02.19 | 4°35.4'N-144°27.8'E  | Surface      | DF-03 |
|                                           | 12-siph6             | 464                            | 10.9                                            | 0.46      | 618                                                                     | MR14-02          | 2014.02.21 | 1°N-147°E            | Surface      | DF-03 |
|                                           | 12-siph7             | 518                            | 7.5                                             | 0.49      | 502                                                                     | MR14-02          | 2014.02.21 | 1°N-147°E            | Surface      | DF-03 |
|                                           | 12-siph8             | 375                            | 8.9                                             | 0.46      | 689                                                                     | MR14-02          | 2014.02.21 | 1°N-147°E            | Surface      | DF-03 |
|                                           | 12-siph9             | 375                            | 13.3                                            | 0.51      | 721                                                                     | MR14-02          | 2014.02.21 | 1°N-147°E            | Surface      | DF-03 |
|                                           | 12-siph10            | 321                            | 7.0                                             | 0.48      | 584                                                                     | MR14-02          | 2014.02.21 | 1°N-147°E            | Surface      | DF-03 |
|                                           | 12-siph11            | 286                            | 14.2                                            | 0.51      | 671                                                                     | MR14-02          | 2014.02.21 | 1°N-147°E            | Surface      | DF-03 |
|                                           | 12-siph13            | 357                            | 3.6                                             | 0.45      | 671                                                                     | MR14-02          | 2014.02.21 | 1°N-147°E            | Surface      | DF-03 |
|                                           | 29-siph20            | 286                            | 2.7                                             | 0.46      | 651                                                                     | MR14-02          | 2014.03.12 | 7°58'N-156°2'E       | Surface      | DF-03 |
|                                           | SSK_siph3            | 518                            | 2.9                                             | 0.40      | 545                                                                     | Sesoko           | 2013.11.29 | 26°37.3'N-127°52.3'E | Surface      | DF-03 |
|                                           | SSK_siph14           | 321                            | 12.2                                            | 0.57      | 726                                                                     | Sesoko           | 2013.11.29 | 26°37.3'N-127°52.3'E | Surface      | DF-03 |
|                                           | SSK_siph17           | 339                            | 4.3                                             | 0.55      | 564                                                                     | Sesoko           | 2013.11.29 | 26°37.3'N-127°52.3'E | Surface      | DF-03 |
|                                           | SSK_siph20           | 232                            | 1.5                                             | 0.51      | 690                                                                     | Sesoko           | 2013.11.29 | 26°37.3'N-127°52.3'E | Surface      | DF-03 |
|                                           | SSK_siph21           | 375                            | 5.2                                             | 0.54      | 720                                                                     | Sesoko           | 2013.11.29 | 26°37.3'N-127°52.3'E | Surface      | DF-03 |
|                                           | SSK_siph22           | 286                            | 2.1                                             | 0.54      | 589                                                                     | Sesoko           | 2013.11.29 | 26°37.3'N-127°52.3'E | Surface      | DF-03 |
|                                           | SSK_siph23           | 268                            | 3.2                                             | 0.54      | 692                                                                     | Sesoko           | 2013.11.29 | 26°37.3'N-127°52.3'E | Surface      | DF-03 |
|                                           | SSK_siph26           | 196                            | 3.4                                             | 0.52      | 712                                                                     | Sesoko           | 2013.11.29 | 26°37.3'N-127°52.3'E | Surface      | DF-03 |
|                                           | SSK_siph27           | 232                            | 3.3                                             | 0.35      | 675                                                                     | Sesoko           | 2013.11.29 | 26°37.3'N-127°52.3'E | Surface      | DF-03 |
|                                           | 1-siph               | 410                            | 14.5                                            | 0.50      | 808                                                                     | Sagami Bay       | 2013.08.05 | 35°10'N-139°11'E     | Surface      | DF-03 |
|                                           | 1-siph2              | 300                            | 3.4                                             | 0.51      | 614                                                                     | Sagami Bay       | 2013.08.05 | 35°10'N-139°11'E     | Surface      | DF-03 |
|                                           | tap3_siphII2         | 360                            | 5.7                                             | 0.50      | 833                                                                     | KS-16-9          | 2016.07.19 | 32°09.7'N-142°04.2'E | Surface      | DF-03 |
|                                           | tap3_siph11          | 326                            | 5.0                                             | 0.36      | 1068                                                                    | KS-16-9          | 2016.07.19 | 32°09.7'N-142°04.2'E | Surface      | DF-03 |
|                                           | Mana_siphII1         | 354                            | 27.8                                            | 0.50      | 806                                                                     | Manazuru         | 2016.10.24 | 35°07'N-139°08'E     | Surface      | DF-03 |
|                                           | Mana_siphII2         | 627                            | 30.0                                            | 0.44      | 725                                                                     | Manazuru         | 2016.10.24 | 35°07'N-139°08'E     | Surface      | DF-03 |
|                                           | Mana_siphII3         | 314                            | 32.4                                            | 0.45      | 868                                                                     | Manazuru         | 2016.10.24 | 35°07'N-139°08'E     | Surface      | DF-03 |
|                                           | T20_siphII3          | 289                            | 6.1                                             | 0.51      | 850                                                                     | T20 / KH-16-7    | 2016.12.17 | 26°06.1'N-125°52'E   | 100-0        | DF-03 |
|                                           | T20_siphII4          | 415                            | 5.1                                             | 0.45      | 566                                                                     | T20 / KH-16-7    | 2016.12.17 | 26°06.1'N-125°52'E   | 100-0        | DF-03 |
|                                           | T20_siphII5          | 260                            | 4.2                                             | 0.55      | 723                                                                     | T20 / KH-16-7    | 2016.12.17 | 26°06.1'N-125°52'E   | 100-0        | DF-03 |
|                                           | T20_siphII6          | 420                            | 5.7                                             | 0.50      | 721                                                                     | T20 / KH-16-7    | 2016.12.17 | 26°06.1'N-125°52'E   | 100-0        | DF-03 |
|                                           | T20_siphII7          | 301                            | 14.3                                            | 0.46      | 842                                                                     | T20 / KH-16-7    | 2016.12.17 | 26°06.1'N-125°52'E   | 100-0        | DF-03 |
|                                           | T20_siphII8          | 322                            | 28.7                                            | 0.54      | 883                                                                     | T20 / KH-16-7    | 2016.12.17 | 26°06.1'N-125°52'E   | 100-0        | DF-03 |
|                                           | T20_siphII9          | 228                            | 4.0                                             | 0.48      | 761                                                                     | T20 / KH-16-7    | 2016.12.17 | 26°06.1'N-125°52'E   | 100-0        | DF-03 |
|                                           | T20_siphII10         | 414                            | 5.4                                             | 0.51      | 721                                                                     | T20 / KH-16-7    | 2016.12.17 | 26°06.1'N-125°52'E   | 100-0        | DF-03 |
|                                           | T20_siphII11         | 314                            | 3.4                                             | 0.47      | 579                                                                     | T20 / KH-16-7    | 2016.12.17 | 26°06.1'N-125°52'E   | 100-0        | DF-03 |
|                                           | St22403_tene1_siphII | 206                            | 3.5                                             | 0.31      | 624                                                                     | 22403 / M140     | 2017.08.13 | 14°47.4'N-32°31.1'W  | 700-500      | DF-14 |
|                                           | St22403_siph1        | 442                            | 6.2                                             | 0.51      | 722                                                                     | 22403 / M140     | 2017.08.13 | 14°47.4'N-32°31.1'W  | 100-80       | DF-14 |
|                                           | St22403_siph2        | 336                            | 3.7                                             | 0.33      | 669                                                                     | 22403 / M140     | 2017.08.13 | 14°47.4'N-32°31.1'W  | 100-80       | DF-14 |
|                                           | St22403_siph3        | 408                            | 5.7                                             | 0.49      | 669                                                                     | 22403 / M140     | 2017.08.13 | 14°47.4'N-32°31.1'W  | 100-80       | DF-14 |
|                                           | St22403_siph4        | 310                            | 3.9                                             | 0.51      | 825                                                                     | 22403 / M140     | 2017.08.13 | 14°47.4'N-32°31.1'W  | 100-80       | DF-14 |
|                                           | Stn22406_siph9       | 305                            | 6.1                                             | 0.52      | 467                                                                     | 22406 / M140     | 2017.08.17 | 12°18.6'N-36°56.6'W  | 60-40        | DF-14 |
|                                           | Stn22406_siph10      | 268                            | 4.7                                             | 0.53      | 595                                                                     | 22406 / M140     | 2017.08.17 | 12°18.6'N-36°56.6'W  | 80-60        | DF-14 |
|                                           | Stn22406_siph11      | 120                            | 1.2                                             | 0.55      | 723                                                                     | 22406 / M140     | 2017.08.17 | 12°18.6'N-36°56.6'W  | 80-60        | DF-14 |
|                                           | Stn22406_siph12      | 299                            | 0.1                                             | -         | -                                                                       | 22406 / M140     | 2017.08.17 | 12°18.6'N-36°56.6'W  | 40-20        | DF-14 |
|                                           | Stn22406_siph13      | 272                            | 0.1                                             | 0.68      | 847                                                                     | 22406 / M140     | 2017.08.17 | 12°18.6'N-36°56.6'W  | 500-300      | DF-14 |
|                                           | Stn22412_siph18      | 422                            | 4.6                                             | 0.49      | 496                                                                     | 22412 / M140     | 2017.08.25 | 14°6.4'N-23°44.5'W   | 80-60        | DF-14 |
|                                           | PP37_siph24          | 239                            | 2.8                                             | 0.35      | 396                                                                     | M140             | 2017.08.25 | 13°10.3'N-23°25.8'W  | Surface      | DF-14 |
|                                           | Stn22412_siph25      | 427                            | 1.8                                             | 0.38      | 903                                                                     | 22412 / M140     | 2017.08.25 | 14°6.4'N-23°44.5'W   | 100-80       | DF-14 |
|                                           | Stn22412_siph26      | 352                            | 0.5                                             | -         | -                                                                       | 22412 / M140     | 2017.08.25 | 14°6.4'N-23°44.5'W   | 100-80       | DF-14 |
|                                           | Stn22412_siph27      | 515                            | 0.8                                             | -         | -                                                                       | 22412 / M140     | 2017.08.25 | 14°6.4'N-23°44.5'W   | 80-60        | DF-14 |
| <i>Globigerinella adamsi</i>              |                      |                                |                                                 |           |                                                                         |                  |            |                      |              |       |
|                                           | St13_adams1          | 1080                           | ND                                              | -         | -                                                                       | St13 / KH-17-4   | 2017.09.20 | 23°N-170°E           | 200-150      | DF-14 |
| <i>Globigerina bulloides</i>              |                      |                                |                                                 |           |                                                                         |                  |            |                      |              |       |

| Species                          | ID                   | Test size<br>( $\mu\text{m}$ ) | Chl <i>a</i> (ng<br>foraminifer <sup>-1</sup> ) | $F_v/F_n$ | $\sigma_{\text{psl}} (\times 10^{-20} \text{ m}^2 \text{ quanta}^{-1})$ | Station / Cruise | Date       | Latitude-Longitude   | Depth<br>(m) | FRRf  |
|----------------------------------|----------------------|--------------------------------|-------------------------------------------------|-----------|-------------------------------------------------------------------------|------------------|------------|----------------------|--------------|-------|
|                                  | K2_c2_50-100_bullo   | 375                            | ND                                              | –         | –                                                                       | K2 / MR13-04     | 2013.07.23 | 47°N-160°E           | 100–50       | DF-03 |
|                                  | K2_c2_50-100_bullo2  | 536                            | 0.1                                             | –         | –                                                                       | K2 / MR13-04     | 2013.07.23 | 47°N-160°E           | 100–50       | DF-03 |
|                                  | K2_c2_50-100_bullo3  | 321                            | ND                                              | –         | –                                                                       | K2 / MR13-04     | 2013.07.23 | 47°N-160°E           | 100–50       | DF-03 |
|                                  | K2_c2_50-100_bullo4  | 304                            | ND                                              | –         | –                                                                       | K2 / MR13-04     | 2013.07.23 | 47°N-160°E           | 100–50       | DF-03 |
|                                  | K2_c2_50-100_bullo5  | 250                            | ND                                              | –         | –                                                                       | K2 / MR13-04     | 2013.07.23 | 47°N-160°E           | 100–50       | DF-03 |
|                                  | 0719-0612_bullo2     | 375                            | ND                                              | –         | –                                                                       | MR13-04          | 2013.07.19 | 38°05'N-146°25'E     | Surface      | DF-03 |
|                                  | 2_bullo              | 328                            | ND                                              | –         | –                                                                       | Sagami Bay       | 2013.04.22 | 35°9'N-139°28.3'E    | Surface      | DF-03 |
|                                  | 1-bullo              | 268                            | ND                                              | –         | –                                                                       | KY14-09          | 2014.06.19 | 34°33.7'N-140°20.5'E | Surface      | DF-03 |
|                                  | 1-bullo2             | 250                            | ND                                              | –         | –                                                                       | KY14-09          | 2014.06.19 | 34°33.7'N-140°20.5'E | Surface      | DF-03 |
|                                  | 1-bullo3             | 250                            | ND                                              | –         | –                                                                       | KY14-09          | 2014.06.19 | 34°33.7'N-140°20.5'E | Surface      | DF-03 |
|                                  | tap1_bullo1          | 380                            | 0.1                                             | –         | –                                                                       | KS-16-9          | 2016.07.18 | 34°10.4'N-140°04.5'E | Surface      | DF-03 |
| <i>Turborotalita quinqueloba</i> |                      |                                |                                                 |           |                                                                         |                  |            |                      |              |       |
|                                  | 0725-0613-quin_large | 211                            | 0.2                                             | –         | –                                                                       | MR13-04          | 2013.07.25 | 44°37.7'N-156°13.1'E | Surface      | DF-03 |
|                                  | quinq1               | 173                            | ND                                              | –         | –                                                                       | Tsugaru Strait   | 2014.05.27 | 41°26.7'N-141°13.2'E | 100–0        | DF-03 |
|                                  | quinq2               | 201                            | ND                                              | –         | –                                                                       | Tsugaru Strait   | 2014.05.27 | 41°26.7'N-141°13.2'E | 100–0        | DF-03 |
|                                  | quinq3               | 138                            | ND                                              | –         | –                                                                       | Tsugaru Strait   | 2014.05.27 | 41°26.7'N-141°13.2'E | 100–0        | DF-03 |
|                                  | quin5-8              | 160                            | ND                                              | –         | –                                                                       | Sagami Bay       | 2013.04.22 | 35°9'N-139°28.3'E    | Surface      | DF-03 |
|                                  | quin5-9              | 155                            | ND                                              | –         | –                                                                       | Sagami Bay       | 2013.04.22 | 35°9'N-139°28.3'E    | Surface      | DF-03 |
|                                  | quin7-1              | 240                            | ND                                              | –         | –                                                                       | Sagami Bay       | 2013.04.22 | 35°9'N-139°28.3'E    | Surface      | DF-03 |
| <i>Turborotalita humilis</i>     |                      |                                |                                                 |           |                                                                         |                  |            |                      |              |       |
|                                  | RM2_cris1            | 128                            | 0.3                                             | 0.49      | 639                                                                     | RM2 / KH-16-7    | 2016.12.20 | 26°04.6'N-126°21.3'E | 100–0        | DF-03 |
|                                  | RM2_cris2            | 110                            | ND                                              | –         | –                                                                       | RM2 / KH-16-7    | 2016.12.20 | 26°04.6'N-126°21.3'E | 100–0        | DF-03 |
|                                  | RM2_cris3            | 166                            | 0.3                                             | 0.49      | 710                                                                     | RM2 / KH-16-7    | 2016.12.20 | 26°04.6'N-126°21.3'E | 100–0        | DF-03 |
|                                  | RM2_cris4            | 162                            | 0.3                                             | 0.54      | 793                                                                     | RM2 / KH-16-7    | 2016.12.20 | 26°04.6'N-126°21.3'E | 100–0        | DF-03 |
|                                  | RM2_cris5            | 128                            | 0.3                                             | 0.62      | 780                                                                     | RM2 / KH-16-7    | 2016.12.20 | 26°04.6'N-126°21.3'E | 100–0        | DF-03 |
|                                  | RM2_cris6            | 152                            | 0.1                                             | 0.62      | 663                                                                     | RM2 / KH-16-7    | 2016.12.20 | 26°04.6'N-126°21.3'E | 100–0        | DF-03 |
|                                  | RM2_cris7            | 129                            | 0.1                                             | 0.55      | 780                                                                     | RM2 / KH-16-7    | 2016.12.20 | 26°04.6'N-126°21.3'E | 100–0        | DF-03 |
|                                  | RM2_cris8            | 137                            | 0.2                                             | 0.50      | 619                                                                     | RM2 / KH-16-7    | 2016.12.20 | 26°04.6'N-126°21.3'E | 100–0        | DF-03 |
|                                  | RM2_cris9            | 143                            | 0.3                                             | 0.53      | 752                                                                     | RM2 / KH-16-7    | 2016.12.20 | 26°04.6'N-126°21.3'E | 100–0        | DF-03 |
|                                  | RM1_cris10           | 169                            | ND                                              | –         | –                                                                       | RM1 / KH-16-7    | 2016.12.21 | 25°49'N-126°55'E     | 100–0        | DF-03 |
|                                  | RM1_cris11           | 168                            | 0.3                                             | 0.54      | 635                                                                     | RM1 / KH-16-7    | 2016.12.21 | 25°49'N-126°55'E     | 100–0        | DF-03 |
|                                  | RM1_cris12           | 116                            | 0.9                                             | 0.45      | 911                                                                     | RM1 / KH-16-7    | 2016.12.21 | 25°49'N-126°55'E     | 100–0        | DF-03 |
|                                  | RM1_cris13           | 115                            | 0.2                                             | 0.49      | 700                                                                     | RM1 / KH-16-7    | 2016.12.21 | 25°49'N-126°55'E     | 100–0        | DF-03 |
|                                  | RM1_cris14           | 140                            | 0.2                                             | 0.44      | 634                                                                     | RM1 / KH-16-7    | 2016.12.21 | 25°49'N-126°55'E     | 100–0        | DF-03 |
|                                  | RM1_cris15           | 144                            | 0.8                                             | 0.49      | 901                                                                     | RM1 / KH-16-7    | 2016.12.21 | 25°49'N-126°55'E     | 100–0        | DF-03 |
|                                  | RM1_cris17           | 97                             | 0.2                                             | 0.51      | 808                                                                     | RM1 / KH-16-7    | 2016.12.21 | 25°49'N-126°55'E     | 100–0        | DF-03 |
|                                  | RM1_cris18           | 111                            | 0.8                                             | 0.44      | 899                                                                     | RM1 / KH-16-7    | 2016.12.21 | 25°49'N-126°55'E     | 100–0        | DF-03 |
|                                  | RM1_cris19           | 117                            | 0.2                                             | 0.54      | 613                                                                     | RM1 / KH-16-7    | 2016.12.21 | 25°49'N-126°55'E     | 100–0        | DF-03 |
|                                  | RM1_cris20           | 109                            | 0.2                                             | 0.51      | 609                                                                     | RM1 / KH-16-7    | 2016.12.21 | 25°49'N-126°55'E     | 100–0        | DF-03 |
| <i>Hastigerina pelagica</i>      |                      |                                |                                                 |           |                                                                         |                  |            |                      |              |       |
|                                  | S1_100-150_pela      | 500                            | 0.2                                             | –         | –                                                                       | S1 / MR13-04     | 2013.07.13 | 30°N-145°E           | 150–100      | DF-03 |
|                                  | S1_100-150_pela2     | 355                            | 0.3                                             | –         | –                                                                       | S1 / MR13-04     | 2013.07.13 | 30°N-145°E           | 150–100      | DF-03 |
|                                  | 9-pela1              | 536                            | ND                                              | –         | –                                                                       | MR14-02          | 2014.02.19 | 4°35.4'N-144°27.8'E  | Surface      | DF-03 |
|                                  | 17-pela2             | 518                            | 1.0                                             | –         | –                                                                       | MR14-02          | 2014.02.26 | 4°58'S-154°44'E      | Surface      | DF-03 |
|                                  | KEO_c1_300-200_pela1 | 750                            | ND                                              | –         | –                                                                       | KEO / KY14-05    | 2014.07.27 | 32°20'N-144°30'E     | 300–200      | DF-03 |
|                                  | KEO_c2_300-200_pela2 | 679                            | ND                                              | –         | –                                                                       | KEO / KY14-05    | 2014.07.27 | 32°20'N-144°30'E     | 300–200      | DF-03 |
|                                  | KEO_c2_300-200_pela3 | 446                            | ND                                              | –         | –                                                                       | KEO / KY14-05    | 2014.07.27 | 32°20'N-144°30'E     | 300–200      | DF-03 |
|                                  | KEO_c2_200-100_pela4 | 625                            | ND                                              | –         | –                                                                       | KEO / KY14-05    | 2014.07.27 | 32°20'N-144°30'E     | 200–100      | DF-03 |
|                                  | KEO_c2_200-100_pela5 | 179                            | ND                                              | –         | –                                                                       | KEO / KY14-05    | 2014.07.27 | 32°20'N-144°30'E     | 200–100      | DF-03 |
|                                  | tap5_pela1           | 525                            | ND                                              | –         | –                                                                       | KS-16-9          | 2016.07.19 | 28°57.5'N-143°18'E   | Surface      | DF-03 |
|                                  | St22403_pela1        | 367                            | 0.2                                             | –         | –                                                                       | 22403 / M140     | 2017.08.13 | 14°47.4'N-32°31.1'W  | 100–80       | DF-14 |
|                                  | Stn22406_pela1       | 834                            | 0.2                                             | –         | –                                                                       | 22406 / M140     | 2017.08.17 | 12°18.6'N-36°56.6'W  | 500–300      | DF-14 |
|                                  | Stn22406_pela2       | 398                            | 0.2                                             | –         | –                                                                       | 22406 / M140     | 2017.08.17 | 12°18.6'N-36°56.6'W  | 500–300      | DF-14 |
|                                  | Stn22406_pela3       | 406                            | ND                                              | –         | –                                                                       | 22406 / M140     | 2017.08.17 | 12°18.6'N-36°56.6'W  | 500–300      | DF-14 |
|                                  | Stn22406_pela4       | 410                            | ND                                              | –         | –                                                                       | 22406 / M140     | 2017.08.17 | 12°18.6'N-36°56.6'W  | 500–300      | DF-14 |
|                                  | Stn22406_pela5       | 387                            | ND                                              | –         | –                                                                       | 22406 / M140     | 2017.08.17 | 12°18.6'N-36°56.6'W  | 500–300      | DF-14 |
|                                  | Stn22406_pela6       | 373                            | ND                                              | –         | –                                                                       | 22406 / M140     | 2017.08.17 | 12°18.6'N-36°56.6'W  | 500–300      | DF-14 |
|                                  | Stn22406_pela7       | 298                            | ND                                              | –         | –                                                                       | 22406 / M140     | 2017.08.17 | 12°18.6'N-36°56.6'W  | 500–300      | DF-14 |
|                                  | Stn22406_pela8       | 421                            | ND                                              | –         | –                                                                       | 22406 / M140     | 2017.08.17 | 12°18.6'N-36°56.6'W  | 200–100      | DF-14 |
|                                  | Stn22406_pela9       | 548                            | 0.2                                             | –         | –                                                                       | 22406 / M140     | 2017.08.17 | 12°18.6'N-36°56.6'W  | 300–200      | DF-14 |
|                                  | Stn22406_pela10      | 456                            | 0.2                                             | –         | –                                                                       | 22406 / M140     | 2017.08.17 | 12°18.6'N-36°56.6'W  | 700–500      | DF-14 |

| Species                            | ID                    | Test size<br>( $\mu\text{m}$ ) | Chl <i>a</i> (ng<br>foraminifer <sup>-1</sup> ) | $F_v/F_n$ | $\sigma_{\text{psst}} (\times 10^{-20} \text{ m}^2 \text{ quanta}^{-1})$ | Station / Cruise | Date       | Latitude-Longitude   | Depth<br>(m) | FRRf  |
|------------------------------------|-----------------------|--------------------------------|-------------------------------------------------|-----------|--------------------------------------------------------------------------|------------------|------------|----------------------|--------------|-------|
|                                    | Stn22406_pela11       | 581                            | ND                                              | –         | –                                                                        | 22406 / M140     | 2017.08.17 | 12°18.6'N-36°56.6'W  | 700–500      | DF-14 |
|                                    | Stn22406_pela12       | 733                            | ND                                              | –         | –                                                                        | 22406 / M140     | 2017.08.17 | 12°18.6'N-36°56.6'W  | 700–500      | DF-14 |
|                                    | Stn22407_pela13       | 195                            | ND                                              | –         | –                                                                        | 22407 / M140     | 2017.08.18 | 12°5.8'N-33°47.1'W   | 300–200      | DF-14 |
|                                    | Stn22407_pela14       | 379                            | ND                                              | –         | –                                                                        | 22407 / M140     | 2017.08.18 | 12°5.8'N-33°47.1'W   | 700–500      | DF-14 |
|                                    | Stn22407_pela15       | 897                            | 0.2                                             | –         | –                                                                        | 22407 / M140     | 2017.08.18 | 12°5.8'N-33°47.1'W   | 500–300      | DF-14 |
|                                    | Stn22408_pela16       | 474                            | 0.2                                             | –         | –                                                                        | 22408 / M140     | 2017.08.19 | 11°52.8'N-30°22.3'W  | 700–500      | DF-14 |
|                                    | Stn22408_pela17       | 289                            | 0.2                                             | –         | –                                                                        | 22408 / M140     | 2017.08.19 | 11°52.8'N-30°22.3'W  | 700–500      | DF-14 |
|                                    | Stn22408_pela18       | 473                            | 0.2                                             | –         | –                                                                        | 22408 / M140     | 2017.08.19 | 11°52.8'N-30°22.3'W  | 700–500      | DF-14 |
|                                    | Stn22408_pela19       | 640                            | 0.2                                             | –         | –                                                                        | 22408 / M140     | 2017.08.19 | 11°52.8'N-30°22.3'W  | 700–500      | DF-14 |
|                                    | Stn22408_pela20       | 669                            | 0.2                                             | –         | –                                                                        | 22408 / M140     | 2017.08.19 | 11°52.8'N-30°22.3'W  | 500–300      | DF-14 |
|                                    | 22417_pela21          | 730                            | 0.3                                             | –         | –                                                                        | 22417 / M140     | 2017.08.31 | 20°52.1'N-18°56.3'W  | 700–500      | DF-14 |
|                                    | 22417_pela22          | 1006                           | ND                                              | –         | –                                                                        | 22417 / M140     | 2017.08.31 | 20°52.1'N-18°56.3'W  | 700–500      | DF-14 |
|                                    | 22417_pela23          | 529                            | ND                                              | –         | –                                                                        | 22417 / M140     | 2017.08.31 | 20°52.1'N-18°56.3'W  | 700–500      | DF-14 |
|                                    | tap2_pela1            | 338                            | ND                                              | –         | –                                                                        | KH-17-4          | 2017.09.12 | 31°01.6'N-142°17'E   | Surface      | DF-14 |
|                                    | tap2_pela2            | 321                            | ND                                              | –         | –                                                                        | KH-17-4          | 2017.09.12 | 31°01.6'N-142°17'E   | Surface      | DF-14 |
| <i>Hastigerinella digitata</i>     |                       |                                |                                                 |           |                                                                          |                  |            |                      |              |       |
|                                    | digitata              | 1330                           | ND                                              | –         | –                                                                        | KS-16-9          | 2016.07.22 | 27°N-144°E           | 150–100      | DF-03 |
|                                    | Stn22406_digit1       | 763                            | ND                                              | –         | –                                                                        | 22406 / M140     | 2017.08.17 | 12°18.6'N-36°56.6'W  | 500–300      | DF-14 |
|                                    | Stn22406_digit2       | 436                            | ND                                              | –         | –                                                                        | 22406 / M140     | 2017.08.17 | 12°18.6'N-36°56.6'W  | 500–300      | DF-14 |
|                                    | Stn22408_Hdigit4      | 1327                           | 0.3                                             | –         | –                                                                        | 22408 / M140     | 2017.08.19 | 11°52.8'N-30°22.3'W  | 500–300      | DF-14 |
|                                    | 22417_digit7          | 662                            | ND                                              | –         | –                                                                        | 22417 / M140     | 2017.08.31 | 20°52.1'N-18°56.3'W  | 300–200      | DF-14 |
|                                    | 22421_digit8          | 804                            | ND                                              | –         | –                                                                        | 22421 / M140     | 2017.09.03 | 24°43.7'N-16°34.7'W  | 500–300      | DF-14 |
| <i>Neogloboquadrina incompta</i>   |                       |                                |                                                 |           |                                                                          |                  |            |                      |              |       |
|                                    | F1-I-9_incompta       | 213                            | ND                                              | –         | –                                                                        | F1 / MR13-04     | 2013.07.11 | 36°29'N-141°30'E     | 200–0        | DF-03 |
|                                    | K2_c1_0-50_4dex2_inco | 189                            | ND                                              | –         | –                                                                        | K2 / MR13-04     | 2013.07.22 | 47°N-160°E           | 50–0         | DF-03 |
|                                    | inco3                 | 210                            | ND                                              | –         | –                                                                        | Tsugaru Strait   | 2014.05.27 | 41°26.7'N-141°13.2'E | 100–0        | DF-03 |
|                                    | inco4                 | 197                            | ND                                              | –         | –                                                                        | Tsugaru Strait   | 2014.05.27 | 41°26.7'N-141°13.2'E | 100–0        | DF-03 |
|                                    | inco5                 | 165                            | ND                                              | –         | –                                                                        | Tsugaru Strait   | 2014.05.27 | 41°26.7'N-141°13.2'E | 100–0        | DF-03 |
|                                    | inco8                 | 205                            | ND                                              | –         | –                                                                        | Tsugaru Strait   | 2014.05.27 | 41°26.7'N-141°13.2'E | 100–0        | DF-03 |
|                                    | inco16                | 200                            | ND                                              | –         | –                                                                        | Tsugaru Strait   | 2014.05.27 | 41°26.7'N-141°13.2'E | 100–0        | DF-03 |
|                                    | inco17                | 180                            | ND                                              | –         | –                                                                        | Tsugaru Strait   | 2014.05.27 | 41°26.7'N-141°13.2'E | 100–0        | DF-03 |
| <i>Neogloboquadrina pachyderma</i> |                       |                                |                                                 |           |                                                                          |                  |            |                      |              |       |
|                                    | 0721-0006_pach        | 200                            | ND                                              | –         | –                                                                        | MR13-04          | 2013.07.21 | 44°N-155°E           | Surface      | DF-03 |
|                                    | 0721-0006_pach2       | 189                            | ND                                              | –         | –                                                                        | MR13-04          | 2013.07.21 | 44°N-155°E           | Surface      | DF-03 |
|                                    | 0724-1206_sin_pach    | 211                            | ND                                              | –         | –                                                                        | MR13-04          | 2013.07.24 | 47°N-160°E           | Surface      | DF-03 |
|                                    | pachy1                | 179                            | ND                                              | –         | –                                                                        | Tsugaru Strait   | 2014.05.27 | 41°26.7'N-141°13.2'E | 100–0        | DF-03 |
|                                    | pachy3                | 181                            | ND                                              | –         | –                                                                        | Tsugaru Strait   | 2014.05.27 | 41°26.7'N-141°13.2'E | 100–0        | DF-03 |
|                                    | pachy6                | 220                            | ND                                              | –         | –                                                                        | Tsugaru Strait   | 2014.05.27 | 41°26.7'N-141°13.2'E | 100–0        | DF-03 |
| <i>Neogloboquadrina dutertrei</i>  |                       |                                |                                                 |           |                                                                          |                  |            |                      |              |       |
|                                    | F1-I-1_dut            | 389                            | 1.5                                             | 0.32      | 835                                                                      | F1 / MR13-04     | 2013.07.11 | 36°29'N-141°30'E     | Surface      | DF-03 |
|                                    | 0718-0612TAP_dut-kawa | 300                            | 1.7                                             | 0.41      | 761                                                                      | MR13-04          | 2013.07.18 | 33°53.4'N-145°02.8'E | Surface      | DF-03 |
|                                    | 0720-0612_dut         | 478                            | 3.5                                             | 0.47      | 751                                                                      | MR13-04          | 2013.07.20 | 42°N-152°33'E        | Surface      | DF-03 |
|                                    | 0720-0612_inco_dut    | 433                            | 3.4                                             | 0.45      | 720                                                                      | MR13-04          | 2013.07.20 | 42°N-152°33'E        | Surface      | DF-03 |
|                                    | 0720-0612_dut2        | 189                            | 0.4                                             | 0.38      | 704                                                                      | MR13-04          | 2013.07.20 | 42°N-152°33'E        | Surface      | DF-03 |
|                                    | 0726-0612_dut         | 400                            | 3.1                                             | 0.45      | 632                                                                      | MR13-04          | 2013.07.26 | 40°39.8'N-150°9.9'E  | Surface      | DF-03 |
|                                    | 7-dut1                | 393                            | 4.4                                             | 0.43      | 646                                                                      | MR14-02          | 2014.02.18 | 3°52'N-141°20'E      | Surface      | DF-03 |
|                                    | 17-dut2               | 625                            | 5.8                                             | 0.35      | 557                                                                      | MR14-02          | 2014.02.26 | 4°58'S-154°44'E      | Surface      | DF-03 |
|                                    | 17-dut3               | 482                            | 1.8                                             | 0.30      | 718                                                                      | MR14-02          | 2014.02.26 | 4°58'S-154°44'E      | Surface      | DF-03 |
|                                    | 23-dut4               | 321                            | 1.0                                             | 0.41      | 571                                                                      | MR14-02          | 2014.03.04 | 0°N/S-156°E          | Surface      | DF-03 |
|                                    | 2_dut                 | 360                            | 0.5                                             | 0.46      | 775                                                                      | Sagami Bay       | 2013.08.05 | 35°10'N-139°11'E     | Surface      | DF-03 |
|                                    | 2_dut2                | 580                            | 3.8                                             | 0.47      | 705                                                                      | Sagami Bay       | 2013.08.05 | 35°10'N-139°11'E     | Surface      | DF-03 |
|                                    | 2_dut3                | 450                            | 1.6                                             | 0.49      | 753                                                                      | Sagami Bay       | 2013.08.05 | 35°10'N-139°11'E     | Surface      | DF-03 |
|                                    | 3_dut                 | 490                            | 2.5                                             | 0.43      | 627                                                                      | Sagami Bay       | 2013.08.05 | 35°10'N-139°11'E     | Surface      | DF-03 |
|                                    | KY14-09_1-dut         | 393                            | 2.7                                             | 0.38      | 780                                                                      | KY14-09          | 2014.06.19 | 34°33.7'N-140°20.5'E | Surface      | DF-03 |
|                                    | tap3_dut2             | 314                            | 1.4                                             | 0.41      | 778                                                                      | KS-16-9          | 2016.07.19 | 32°09.7'N-142°04.2'E | Surface      | DF-03 |
|                                    | tap4_dut1             | 392                            | 1.0                                             | 0.45      | 802                                                                      | KH-16-7          | 2016.12.08 | 26°40.7'N-145°14.3'E | Surface      | DF-03 |
|                                    | tap10_dut2            | 343                            | 1.8                                             | 0.35      | 749                                                                      | KH-16-7          | 2016.12.14 | 26°18'N-126°44'E     | Surface      | DF-03 |
|                                    | T20_dut3              | 390                            | 1.1                                             | 0.46      | 762                                                                      | T20 / KH-16-7    | 2016.12.17 | 26°06.1'N-125°52'E   | 100–0        | DF-03 |
|                                    | T20_dut4              | 480                            | 4.3                                             | 0.51      | 827                                                                      | T20 / KH-16-7    | 2016.12.17 | 26°06.1'N-125°52'E   | 100–0        | DF-03 |
|                                    | T20_dut5              | 396                            | 1.3                                             | 0.48      | 787                                                                      | T20 / KH-16-7    | 2016.12.17 | 26°06.1'N-125°52'E   | 100–0        | DF-03 |

| Species | ID         | Test size<br>( $\mu\text{m}$ ) | Chl <i>a</i> (ng<br>foraminifer <sup>-1</sup> ) | $F_v/F_n$ | $\sigma_{\text{psfl}} (\times 10^{-20} \text{ m}^2 \text{ quanta}^{-1})$ | Station / Cruise | Date       | Latitude-Longitude   | Depth<br>(m) | FRRF  |
|---------|------------|--------------------------------|-------------------------------------------------|-----------|--------------------------------------------------------------------------|------------------|------------|----------------------|--------------|-------|
|         | T20_dut6   | 454                            | 2.6                                             | 0.48      | 761                                                                      | T20 / KH-16-7    | 2016.12.17 | 26°06.1'N-125°52'E   | 100-0        | DF-03 |
|         | T20_dut7   | 359                            | 1.7                                             | 0.48      | 825                                                                      | T20 / KH-16-7    | 2016.12.17 | 26°06.1'N-125°52'E   | 100-0        | DF-03 |
|         | T20_dut8   | 360                            | 1.5                                             | 0.47      | 812                                                                      | T20 / KH-16-7    | 2016.12.17 | 26°06.1'N-125°52'E   | 100-0        | DF-03 |
|         | T20_dut9   | 279                            | 0.7                                             | 0.47      | 822                                                                      | T20 / KH-16-7    | 2016.12.17 | 26°06.1'N-125°52'E   | 100-0        | DF-03 |
|         | T20_dut10  | 397                            | 1.5                                             | 0.48      | 813                                                                      | T20 / KH-16-7    | 2016.12.17 | 26°06.1'N-125°52'E   | 100-0        | DF-03 |
|         | T20_dut11  | 310                            | 0.7                                             | 0.49      | 749                                                                      | T20 / KH-16-7    | 2016.12.17 | 26°06.1'N-125°52'E   | 100-0        | DF-03 |
|         | T20_dut12  | 407                            | 1.5                                             | 0.48      | 858                                                                      | T20 / KH-16-7    | 2016.12.17 | 26°06.1'N-125°52'E   | 100-0        | DF-03 |
|         | T20_dut13  | 370                            | 1.6                                             | 0.47      | 807                                                                      | T20 / KH-16-7    | 2016.12.17 | 26°06.1'N-125°52'E   | 100-0        | DF-03 |
|         | T20_dut14  | 357                            | 1.4                                             | 0.48      | 791                                                                      | T20 / KH-16-7    | 2016.12.17 | 26°06.1'N-125°52'E   | 100-0        | DF-03 |
|         | T20_dut15  | 314                            | 0.3                                             | 0.47      | 857                                                                      | T20 / KH-16-7    | 2016.12.17 | 26°06.1'N-125°52'E   | 100-0        | DF-03 |
|         | T20_dut16  | 371                            | 1.3                                             | 0.48      | 886                                                                      | T20 / KH-16-7    | 2016.12.17 | 26°06.1'N-125°52'E   | 100-0        | DF-03 |
|         | T20_dut17  | 407                            | 2.6                                             | 0.47      | 763                                                                      | T20 / KH-16-7    | 2016.12.17 | 26°06.1'N-125°52'E   | 100-0        | DF-03 |
|         | T20_dut18  | 378                            | 1.4                                             | 0.51      | 839                                                                      | T20 / KH-16-7    | 2016.12.17 | 26°06.1'N-125°52'E   | 100-0        | DF-03 |
|         | T20_dut19  | 276                            | 0.7                                             | 0.52      | 823                                                                      | T20 / KH-16-7    | 2016.12.17 | 26°06.1'N-125°52'E   | 100-0        | DF-03 |
|         | T20_dut20  | 282                            | 1.1                                             | 0.53      | 764                                                                      | T20 / KH-16-7    | 2016.12.17 | 26°06.1'N-125°52'E   | 100-0        | DF-03 |
|         | T20_dut21  | 305                            | 0.4                                             | 0.49      | 778                                                                      | T20 / KH-16-7    | 2016.12.17 | 26°06.1'N-125°52'E   | 100-0        | DF-03 |
|         | T20_dut22  | 502                            | 3.4                                             | 0.50      | 736                                                                      | T20 / KH-16-7    | 2016.12.17 | 26°06.1'N-125°52'E   | 100-0        | DF-03 |
|         | T20_dut23  | 414                            | 3.2                                             | 0.48      | 709                                                                      | T20 / KH-16-7    | 2016.12.17 | 26°06.1'N-125°52'E   | 100-0        | DF-03 |
|         | T20_dut24  | 351                            | 2.1                                             | 0.47      | 898                                                                      | T20 / KH-16-7    | 2016.12.17 | 26°06.1'N-125°52'E   | 100-0        | DF-03 |
|         | T20_dut25  | 388                            | 1.5                                             | 0.44      | 786                                                                      | T20 / KH-16-7    | 2016.12.17 | 26°06.1'N-125°52'E   | 100-0        | DF-03 |
|         | T20_dut26  | 406                            | 2.6                                             | 0.45      | 872                                                                      | T20 / KH-16-7    | 2016.12.17 | 26°06.1'N-125°52'E   | 100-0        | DF-03 |
|         | T15_dut27  | 579                            | 5.1                                             | 0.51      | 783                                                                      | T15 / KH-16-7    | 2016.12.18 | 25°59.5'N-125°26.7'E | 100-0        | DF-03 |
|         | T15_dut28  | 458                            | 2.7                                             | 0.49      | 770                                                                      | T15 / KH-16-7    | 2016.12.18 | 25°59.5'N-125°26.7'E | 100-0        | DF-03 |
|         | T15_dut29  | 473                            | 3.4                                             | 0.49      | 803                                                                      | T15 / KH-16-7    | 2016.12.18 | 25°59.5'N-125°26.7'E | 100-0        | DF-03 |
|         | T15_dut30  | 429                            | 2.0                                             | 0.45      | 785                                                                      | T15 / KH-16-7    | 2016.12.18 | 25°59.5'N-125°26.7'E | 100-0        | DF-03 |
|         | T15_dut31  | 394                            | 2.6                                             | 0.48      | 702                                                                      | T15 / KH-16-7    | 2016.12.18 | 25°59.5'N-125°26.7'E | 100-0        | DF-03 |
|         | T15_dut32  | 481                            | 3.8                                             | 0.47      | 718                                                                      | T15 / KH-16-7    | 2016.12.18 | 25°59.5'N-125°26.7'E | 100-0        | DF-03 |
|         | T15_dut33  | 367                            | 1.9                                             | 0.45      | 821                                                                      | T15 / KH-16-7    | 2016.12.18 | 25°59.5'N-125°26.7'E | 100-0        | DF-03 |
|         | T15_dut34  | 329                            | 1.4                                             | 0.50      | 814                                                                      | T15 / KH-16-7    | 2016.12.18 | 25°59.5'N-125°26.7'E | 100-0        | DF-03 |
|         | T15_dut35  | 367                            | 2.4                                             | 0.49      | 859                                                                      | T15 / KH-16-7    | 2016.12.18 | 25°59.5'N-125°26.7'E | 100-0        | DF-03 |
|         | T15_dut36  | 393                            | 1.7                                             | 0.48      | 859                                                                      | T9 / KH-16-7     | 2016.12.19 | 25°49.3'N-126°55'E   | 100-0        | DF-03 |
|         | T15_dut37  | 533                            | 4.4                                             | 0.48      | 745                                                                      | T9 / KH-16-7     | 2016.12.19 | 25°49.3'N-126°55'E   | 100-0        | DF-03 |
|         | T15_dut38  | 435                            | 2.1                                             | 0.48      | 724                                                                      | T9 / KH-16-7     | 2016.12.19 | 25°49.3'N-126°55'E   | 100-0        | DF-03 |
|         | T15_dut39  | 501                            | 2.1                                             | 0.49      | 680                                                                      | T9 / KH-16-7     | 2016.12.19 | 25°49.3'N-126°55'E   | 100-0        | DF-03 |
|         | T15_dut40  | 426                            | 2.5                                             | 0.48      | 775                                                                      | T9 / KH-16-7     | 2016.12.19 | 25°49.3'N-126°55'E   | 100-0        | DF-03 |
|         | mana_dut1  | 500                            | 3.9                                             | 0.52      | 657                                                                      | M1 / Manazuru    | 2017.07.13 | 35°09'N-139°10.5'E   | Surface      | DF-14 |
|         | mana_dut2  | 417                            | 2.5                                             | 0.53      | 550                                                                      | M1 / Manazuru    | 2017.07.13 | 35°09'N-139°10.5'E   | Surface      | DF-14 |
|         | mana_dut4  | 417                            | 1.9                                             | 0.41      | 630                                                                      | M1 / Manazuru    | 2017.07.13 | 35°09'N-139°10.5'E   | Surface      | DF-14 |
|         | mana_dut6  | 483                            | 1.1                                             | 0.50      | 819                                                                      | M1 / Manazuru    | 2017.07.13 | 35°09'N-139°10.5'E   | Surface      | DF-14 |
|         | mana_dut7  | 492                            | 3.4                                             | 0.52      | 569                                                                      | M1 / Manazuru    | 2017.07.13 | 35°09'N-139°10.5'E   | Surface      | DF-14 |
|         | mana_dut8  | 433                            | 2.5                                             | 0.41      | 570                                                                      | M1 / Manazuru    | 2017.07.13 | 35°09'N-139°10.5'E   | Surface      | DF-14 |
|         | mana_dut9  | 500                            | 4.5                                             | 0.48      | 691                                                                      | M1 / Manazuru    | 2017.07.13 | 35°09'N-139°10.5'E   | Surface      | DF-14 |
|         | mana_dut10 | 433                            | 2.2                                             | 0.43      | 624                                                                      | M1 / Manazuru    | 2017.07.13 | 35°09'N-139°10.5'E   | Surface      | DF-14 |
|         | mana_dut11 | 483                            | ND                                              | -         | -                                                                        | M1 / Manazuru    | 2017.07.13 | 35°09'N-139°10.5'E   | Surface      | DF-14 |
|         | mana_dut12 | 492                            | 1.8                                             | 0.52      | 549                                                                      | M1 / Manazuru    | 2017.07.13 | 35°09'N-139°10.5'E   | Surface      | DF-14 |
|         | mana_dut14 | 517                            | 3.5                                             | 0.53      | 805                                                                      | M1 / Manazuru    | 2017.07.13 | 35°09'N-139°10.5'E   | Surface      | DF-14 |
|         | mana_dut15 | 483                            | 5.7                                             | 0.51      | 651                                                                      | M1 / Manazuru    | 2017.07.13 | 35°09'N-139°10.5'E   | Surface      | DF-14 |
|         | mana_dut16 | 425                            | 4.7                                             | 0.51      | 656                                                                      | M1 / Manazuru    | 2017.07.13 | 35°09'N-139°10.5'E   | Surface      | DF-14 |
|         | mana_dut17 | 475                            | 6.0                                             | 0.53      | 640                                                                      | M1 / Manazuru    | 2017.07.13 | 35°09'N-139°10.5'E   | Surface      | DF-14 |
|         | mana_dut18 | 467                            | 4.6                                             | 0.50      | 660                                                                      | M1 / Manazuru    | 2017.07.13 | 35°09'N-139°10.5'E   | Surface      | DF-14 |
|         | mana_dut19 | 433                            | 5.1                                             | 0.54      | 591                                                                      | M1 / Manazuru    | 2017.07.13 | 35°09'N-139°10.5'E   | Surface      | DF-14 |
|         | mana_dut20 | 417                            | 2.6                                             | 0.51      | 639                                                                      | M1 / Manazuru    | 2017.07.13 | 35°09'N-139°10.5'E   | Surface      | DF-14 |
|         | mana_dut22 | 517                            | 6.3                                             | 0.54      | 567                                                                      | M1 / Manazuru    | 2017.07.13 | 35°09'N-139°10.5'E   | Surface      | DF-14 |
|         | mana_dut23 | 425                            | 2.2                                             | 0.50      | 815                                                                      | M1 / Manazuru    | 2017.07.13 | 35°09'N-139°10.5'E   | Surface      | DF-14 |
|         | mana_dut24 | 483                            | 3.5                                             | 0.52      | 705                                                                      | M1 / Manazuru    | 2017.07.13 | 35°09'N-139°10.5'E   | Surface      | DF-14 |
|         | mana_dut25 | 483                            | 3.9                                             | 0.54      | 698                                                                      | M1 / Manazuru    | 2017.07.13 | 35°09'N-139°10.5'E   | Surface      | DF-14 |
|         | mana_dut26 | 450                            | 3.8                                             | 0.53      | 626                                                                      | M1 / Manazuru    | 2017.07.13 | 35°09'N-139°10.5'E   | Surface      | DF-14 |
|         | mana_dut28 | 350                            | 1.3                                             | 0.58      | 633                                                                      | M1 / Manazuru    | 2017.07.13 | 35°09'N-139°10.5'E   | Surface      | DF-14 |
|         | mana_dut29 | 458                            | 1.1                                             | 0.45      | 612                                                                      | M1 / Manazuru    | 2017.07.13 | 35°09'N-139°10.5'E   | Surface      | DF-14 |
|         | mana_dut30 | 317                            | 1.7                                             | 0.49      | 747                                                                      | M1 / Manazuru    | 2017.07.13 | 35°09'N-139°10.5'E   | Surface      | DF-14 |
|         | mana_dut31 | 450                            | 4.1                                             | 0.51      | 560                                                                      | M1 / Manazuru    | 2017.07.13 | 35°09'N-139°10.5'E   | Surface      | DF-14 |
|         | mana_dut33 | 517                            | 1.2                                             | 0.33      | 595                                                                      | M1 / Manazuru    | 2017.07.13 | 35°09'N-139°10.5'E   | Surface      | DF-14 |
|         | mana_dut34 | 367                            | 2.4                                             | 0.52      | 477                                                                      | M1 / Manazuru    | 2017.07.13 | 35°09'N-139°10.5'E   | Surface      | DF-14 |
|         | mana_dut37 | 533                            | 2.2                                             | 0.53      | 807                                                                      | M1 / Manazuru    | 2017.07.13 | 35°09'N-139°10.5'E   | Surface      | DF-14 |

| Species | ID            | Test size<br>( $\mu\text{m}$ ) | Chl <i>a</i> (ng<br>foraminifer <sup>-1</sup> ) | $F_v/F_n$ | $\sigma_{\text{psl}} (\times 10^{-20} \text{ m}^2 \text{ quanta}^{-1})$ | Station / Cruise | Date       | Latitude-Longitude  | Depth<br>(m) | FRRF  |
|---------|---------------|--------------------------------|-------------------------------------------------|-----------|-------------------------------------------------------------------------|------------------|------------|---------------------|--------------|-------|
|         | mana_dut38    | 533                            | 5.2                                             | 0.53      | 520                                                                     | M1 / Manazuru    | 2017.07.13 | 35°09'N-139°10.5'E  | Surface      | DF-14 |
|         | mana_dut39    | 467                            | 4.2                                             | 0.53      | 868                                                                     | M1 / Manazuru    | 2017.07.13 | 35°09'N-139°10.5'E  | Surface      | DF-14 |
|         | mana_dut40    | 433                            | 1.4                                             | 0.31      | 654                                                                     | M1 / Manazuru    | 2017.07.13 | 35°09'N-139°10.5'E  | Surface      | DF-14 |
|         | Stn22407_dut1 | 151                            | 0.1                                             | 0.49      | 248                                                                     | 22407 / M140     | 2017.08.18 | 12°5.8'N-33°47.1'W  | 40–20        | DF-14 |
|         | Stn22407_dut2 | 270                            | ND                                              | –         | –                                                                       | 22407 / M140     | 2017.08.18 | 12°5.8'N-33°47.1'W  | 100–80       | DF-14 |
|         | Stn22407_dut3 | 291                            | ND                                              | –         | –                                                                       | 22409 / M140     | 2017.08.20 | 11°41.3'N-26°39.7'W | 500–300      | DF-14 |
|         | Stn22409_dut4 | 397                            | 3.7                                             | 0.50      | 882                                                                     | 22409 / M140     | 2017.08.20 | 11°41.3'N-26°39.7'W | 40–20        | DF-14 |
|         | Stn22409_dut5 | 437                            | ND                                              | –         | –                                                                       | 22409 / M140     | 2017.08.20 | 11°41.3'N-26°39.7'W | 80–60        | DF-14 |
|         | Stn22412_dut6 | 248                            | 0.7                                             | 0.54      | 524                                                                     | 22412 / M140     | 2017.08.25 | 14°6.4'N-23°44.5'W  | 80–60        | DF-14 |
|         | 22413_dut7    | 323                            | 0.5                                             | –         | –                                                                       | 22413 / M140     | 2017.08.27 | 19°31.4'N-22°35.4'W | 100–80       | DF-14 |
|         | 22413_dut8    | 298                            | 0.4                                             | –         | –                                                                       | 22413 / M140     | 2017.08.27 | 19°31.4'N-22°35.4'W | 100–80       | DF-14 |
|         | 22413_dut9    | 621                            | 8.4                                             | 0.50      | 564                                                                     | 22413 / M140     | 2017.08.27 | 19°31.4'N-22°35.4'W | 60–40        | DF-14 |

*Pulleniatina obliquiloculata*

|  |                      |     |     |      |     |               |            |                      |         |       |
|--|----------------------|-----|-----|------|-----|---------------|------------|----------------------|---------|-------|
|  | 0713-0006_obliq1     | 344 | ND  | –    | –   | MR13-04       | 2013.07.13 | 32°56.8'N-143°59.5'E | Surface | DF-03 |
|  | 0713-0612_obliq      | 377 | 0.2 | –    | –   | MR13-04       | 2013.07.13 | 31°44.5'E-144°27.5'E | Surface | DF-03 |
|  | 13-obliq1            | 464 | 0.1 | 0.17 | 780 | MR14-02       | 2014.02.22 | 0°N/S-147°E          | Surface | DF-03 |
|  | 13-obliq2            | 482 | 0.2 | 0.31 | 351 | MR14-02       | 2014.02.22 | 0°N/S-147°E          | Surface | DF-03 |
|  | 13-obliq3            | 464 | 0.1 | 0.23 | 385 | MR14-02       | 2014.02.22 | 0°N/S-147°E          | Surface | DF-03 |
|  | 13-obliq4            | 571 | 0.3 | 0.16 | 414 | MR14-02       | 2014.02.22 | 0°N/S-147°E          | Surface | DF-03 |
|  | 13-obliq5            | 446 | 0.1 | 0.20 | 516 | MR14-02       | 2014.02.22 | 0°N/S-147°E          | Surface | DF-03 |
|  | 17-obliq6            | 411 | 0.1 | 0.26 | 293 | MR14-02       | 2014.02.26 | 4°58'S-154°44'E      | Surface | DF-03 |
|  | 17-obliq7            | 411 | 0.1 | 0.37 | 385 | MR14-02       | 2014.02.26 | 4°58'S-154°44'E      | Surface | DF-03 |
|  | 24-obliq7            | 543 | 0.2 | –    | –   | MR14-02       | 2014.03.05 | 0°2.2'S-156°8.0'E    | Surface | DF-03 |
|  | 1-obliq              | 425 | 0.2 | 0.40 | 349 | Sagami Bay    | 2013.08.05 | 35°10'N-139°11'E     | Surface | DF-03 |
|  | obliq1_S1-c4-100-50  | 357 | 0.5 | 0.29 | 520 | S1 / KY14-09  | 2014.07.22 | 30°N-145°E           | 100–50  | DF-03 |
|  | obliq2_S1-c4-100-50  | 446 | 0.4 | 0.27 | 417 | S1 / KY14-09  | 2014.07.22 | 30°N-145°E           | 100–50  | DF-03 |
|  | obliq3_S1-c4-100-50  | 339 | 0.4 | 0.28 | 416 | S1 / KY14-09  | 2014.07.22 | 30°N-145°E           | 100–50  | DF-03 |
|  | obliq4_S1-c4-100-50  | 393 | 0.3 | 0.30 | 364 | S1 / KY14-09  | 2014.07.22 | 30°N-145°E           | 100–50  | DF-03 |
|  | obliq5_S1_c3-300-200 | 286 | ND  | –    | –   | S1 / KY14-09  | 2014.07.22 | 30°N-145°E           | 300–200 | DF-03 |
|  | obliq6_S1-c4-100-50  | 286 | 0.1 | 0.37 | 504 | S1 / KY14-09  | 2014.07.22 | 30°N-145°E           | 100–50  | DF-03 |
|  | obliq7_S1-c4-100-50  | 286 | 1.1 | 0.43 | 465 | S1 / KY14-09  | 2014.07.22 | 30°N-145°E           | 100–50  | DF-03 |
|  | obliq8_S1-c4-100-50  | 214 | 0.6 | 0.38 | 462 | S1 / KY14-09  | 2014.07.22 | 30°N-145°E           | 100–50  | DF-03 |
|  | obliq9_S1-c3-50-0    | 357 | 0.2 | 0.46 | 467 | S1 / KY14-09  | 2014.07.22 | 30°N-145°E           | 50–0    | DF-03 |
|  | tap12_obliq1         | 438 | ND  | –    | –   | KH-16-7       | 2016.12.15 | 26°18'N-126°44'E     | Surface | DF-03 |
|  | tap12_obliq2         | 551 | ND  | –    | –   | KH-16-7       | 2016.12.15 | 26°18'N-126°44'E     | Surface | DF-03 |
|  | tap12_obliq3         | 317 | ND  | –    | –   | KH-16-7       | 2016.12.15 | 26°18'N-126°44'E     | Surface | DF-03 |
|  | tap14_obliq4         | 363 | 0.2 | 0.40 | 398 | KH-16-7       | 2016.12.17 | 26°10.1'N-126°18'E   | Surface | DF-03 |
|  | T20_obliq5           | 395 | 0.3 | 0.45 | 480 | T20 / KH-16-7 | 2016.12.17 | 26°06.1'N-125°52'E   | 100–0   | DF-03 |
|  | T20_obliq6           | 404 | 0.1 | 0.40 | 681 | T20 / KH-16-7 | 2016.12.17 | 26°06.1'N-125°52'E   | 100–0   | DF-03 |
|  | T20_obliq7           | 474 | 0.1 | 0.37 | 362 | T20 / KH-16-7 | 2016.12.17 | 26°06.1'N-125°52'E   | 100–0   | DF-03 |
|  | T20_obliq8           | 549 | 2.9 | –    | –   | T20 / KH-16-7 | 2016.12.17 | 26°06.1'N-125°52'E   | 100–0   | DF-03 |
|  | T20_obliq9           | 478 | 0.1 | 0.42 | 660 | T20 / KH-16-7 | 2016.12.17 | 26°06.1'N-125°52'E   | 100–0   | DF-03 |
|  | T20_obliq10          | 480 | ND  | –    | –   | T20 / KH-16-7 | 2016.12.17 | 26°06.1'N-125°52'E   | 100–0   | DF-03 |
|  | T20_obliq11          | 607 | 0.3 | 0.38 | 565 | T20 / KH-16-7 | 2016.12.17 | 26°06.1'N-125°52'E   | 100–0   | DF-03 |
|  | T20_obliq12          | 418 | 0.1 | 0.44 | 780 | T20 / KH-16-7 | 2016.12.17 | 26°06.1'N-125°52'E   | 100–0   | DF-03 |
|  | T20_obliq13          | 520 | ND  | –    | –   | T20 / KH-16-7 | 2016.12.17 | 26°06.1'N-125°52'E   | 100–0   | DF-03 |
|  | T20_obliq14          | 472 | 0.4 | 0.48 | 589 | T20 / KH-16-7 | 2016.12.17 | 26°06.1'N-125°52'E   | 100–0   | DF-03 |
|  | T20_obliq15          | 494 | 0.2 | 0.46 | 793 | T20 / KH-16-7 | 2016.12.17 | 26°06.1'N-125°52'E   | 100–0   | DF-03 |
|  | T20_obliq16          | 427 | 0.2 | 0.43 | 581 | T20 / KH-16-7 | 2016.12.17 | 26°06.1'N-125°52'E   | 100–0   | DF-03 |
|  | T20_obliq17          | 499 | 0.3 | 0.47 | 518 | T20 / KH-16-7 | 2016.12.17 | 26°06.1'N-125°52'E   | 100–0   | DF-03 |
|  | T20_obliq18          | 382 | ND  | –    | –   | T20 / KH-16-7 | 2016.12.17 | 26°06.1'N-125°52'E   | 100–0   | DF-03 |
|  | T20_obliq19          | 401 | ND  | –    | –   | T20 / KH-16-7 | 2016.12.17 | 26°06.1'N-125°52'E   | 100–0   | DF-03 |
|  | T20_obliq20          | 399 | ND  | –    | –   | T20 / KH-16-7 | 2016.12.17 | 26°06.1'N-125°52'E   | 100–0   | DF-03 |
|  | T20_obliq21          | 401 | 0.2 | 0.34 | 652 | T20 / KH-16-7 | 2016.12.17 | 26°06.1'N-125°52'E   | 100–0   | DF-03 |
|  | T20_obliq22          | 346 | 0.6 | 0.40 | 543 | T20 / KH-16-7 | 2016.12.17 | 26°06.1'N-125°52'E   | 100–0   | DF-03 |
|  | T20_obliq23          | 421 | ND  | –    | –   | T20 / KH-16-7 | 2016.12.17 | 26°06.1'N-125°52'E   | 100–0   | DF-03 |
|  | T20_obliq24          | 352 | ND  | –    | –   | T20 / KH-16-7 | 2016.12.17 | 26°06.1'N-125°52'E   | 100–0   | DF-03 |
|  | T20_obliq25          | 331 | ND  | –    | –   | T20 / KH-16-7 | 2016.12.17 | 26°06.1'N-125°52'E   | 100–0   | DF-03 |
|  | T20_obliq26          | 396 | ND  | –    | –   | T20 / KH-16-7 | 2016.12.17 | 26°06.1'N-125°52'E   | 100–0   | DF-03 |
|  | T20_obliq27          | 366 | 0.2 | 0.41 | 654 | T20 / KH-16-7 | 2016.12.17 | 26°06.1'N-125°52'E   | 100–0   | DF-03 |
|  | T20_obliq28          | 478 | 0.1 | 0.36 | 479 | T20 / KH-16-7 | 2016.12.17 | 26°06.1'N-125°52'E   | 100–0   | DF-03 |
|  | T20_obliq29          | 412 | ND  | –    | –   | T20 / KH-16-7 | 2016.12.17 | 26°06.1'N-125°52'E   | 100–0   | DF-03 |
|  | T20_obliq30          | 324 | ND  | –    | –   | T20 / KH-16-7 | 2016.12.17 | 26°06.1'N-125°52'E   | 100–0   | DF-03 |



| Species                      | ID                | Test size<br>( $\mu\text{m}$ ) | Chl <i>a</i> (ng<br>foraminifer <sup>-1</sup> ) | $F_v/F_n$ | $\sigma_{\text{psl}} (\times 10^{-20} \text{ m}^2 \text{ quanta}^{-1})$ | Station / Cruise | Date       | Latitude-Longitude   | Depth<br>(m) | FRRF  |
|------------------------------|-------------------|--------------------------------|-------------------------------------------------|-----------|-------------------------------------------------------------------------|------------------|------------|----------------------|--------------|-------|
|                              | T20_obliq31       | 404                            | 0.1                                             | 0.46      | 650                                                                     | T20 / KH-16-7    | 2016.12.17 | 26°06.1'N-125°52'E   | 100-0        | DF-03 |
|                              | T20_obliq32       | 316                            | ND                                              | –         | –                                                                       | T20 / KH-16-7    | 2016.12.17 | 26°06.1'N-125°52'E   | 100-0        | DF-03 |
|                              | T20_obliq33       | 374                            | ND                                              | –         | –                                                                       | T20 / KH-16-7    | 2016.12.17 | 26°06.1'N-125°52'E   | 100-0        | DF-03 |
|                              | T20_obliq34       | 309                            | ND                                              | –         | –                                                                       | T20 / KH-16-7    | 2016.12.17 | 26°06.1'N-125°52'E   | 100-0        | DF-03 |
|                              | T15_obliq35       | 437                            | 0.2                                             | 0.16      | 580                                                                     | T15 / KH-16-7    | 2016.12.18 | 25°59.5'N-125°26.7'E | 100-0        | DF-03 |
|                              | T15_obliq36       | 567                            | 0.5                                             | 0.21      | 617                                                                     | T15 / KH-16-7    | 2016.12.18 | 25°59.5'N-125°26.7'E | 100-0        | DF-03 |
|                              | T15_obliq37       | 564                            | 0.1                                             | 0.13      | 284                                                                     | T15 / KH-16-7    | 2016.12.18 | 25°59.5'N-125°26.7'E | 100-0        | DF-03 |
|                              | T15_obliq38       | 473                            | 0.2                                             | 0.23      | 456                                                                     | T15 / KH-16-7    | 2016.12.18 | 25°59.5'N-125°26.7'E | 100-0        | DF-03 |
|                              | T15_obliq39       | 434                            | 0.3                                             | 0.24      | 617                                                                     | T15 / KH-16-7    | 2016.12.18 | 25°59.5'N-125°26.7'E | 100-0        | DF-03 |
|                              | T15_obliq40       | 400                            | 0.1                                             | 0.23      | 403                                                                     | T15 / KH-16-7    | 2016.12.18 | 25°59.5'N-125°26.7'E | 100-0        | DF-03 |
|                              | T15_obliq41       | 427                            | 0.3                                             | 0.17      | 557                                                                     | T15 / KH-16-7    | 2016.12.18 | 25°59.5'N-125°26.7'E | 100-0        | DF-03 |
|                              | T15_obliq42       | 669                            | 0.2                                             | 0.25      | 551                                                                     | T15 / KH-16-7    | 2016.12.18 | 25°59.5'N-125°26.7'E | 100-0        | DF-03 |
|                              | T15_obliq43       | 534                            | 0.1                                             | 0.27      | 503                                                                     | T15 / KH-16-7    | 2016.12.18 | 25°59.5'N-125°26.7'E | 100-0        | DF-03 |
|                              | mana_obliq1       | 334                            | 1.9                                             | 0.51      | 670                                                                     | M1 / Manazuru    | 2017.07.13 | 35°09'N-139°10.5'E   | Surface      | DF-14 |
|                              | mana_obliq2       | 482                            | 3.0                                             | 0.50      | 626                                                                     | M1 / Manazuru    | 2017.07.13 | 35°09'N-139°10.5'E   | Surface      | DF-14 |
|                              | mana_obliq3       | 450                            | 0.3                                             | 0.28      | 598                                                                     | M1 / Manazuru    | 2017.07.13 | 35°09'N-139°10.5'E   | Surface      | DF-14 |
|                              | mana_obliq4       | 320                            | 0.1                                             | –         | –                                                                       | M1 / Manazuru    | 2017.07.13 | 35°09'N-139°10.5'E   | Surface      | DF-14 |
|                              | mana_obliq5       | 409                            | 0.3                                             | 0.27      | 619                                                                     | M1 / Manazuru    | 2017.07.13 | 35°09'N-139°10.5'E   | Surface      | DF-14 |
| <i>Globorotalia inflata</i>  |                   |                                |                                                 |           |                                                                         |                  |            |                      |              |       |
|                              | 0725-1319_inf     | 344                            | 0.1                                             | –         | –                                                                       | MR13-04          | 2013.07.25 | 43°21.2'N-154°27.1'E | Surface      | DF-03 |
|                              | 0725-1319-inf2    | 330                            | ND                                              | –         | –                                                                       | MR13-04          | 2013.07.25 | 43°21.2'N-154°27.1'E | Surface      | DF-03 |
|                              | 1-inf             | 340                            | 0.4                                             | 0.17      | 489                                                                     | Sagami Bay       | 2013.08.05 | 35°10'N-139°11'E     | Surface      | DF-03 |
|                              | inf1_S1-c4-100-50 | 277                            | 0.1                                             | 0.40      | 544                                                                     | S1 / KY14-09     | 2014.07.22 | 30°N-145°E           | 100-50       | DF-03 |
|                              | inf2_S1-c4-100-50 | 286                            | 0.1                                             | 0.35      | 531                                                                     | S1 / KY14-09     | 2014.07.22 | 30°N-145°E           | 100-50       | DF-03 |
|                              | inf3_S1-c4-100-50 | 268                            | 0.4                                             | 0.35      | 577                                                                     | S1 / KY14-09     | 2014.07.22 | 30°N-145°E           | 100-50       | DF-03 |
|                              | inf4_S1-c3-100-50 | 304                            | 0.2                                             | 0.33      | 601                                                                     | S1 / KY14-09     | 2014.07.22 | 30°N-145°E           | 100-50       | DF-03 |
|                              | inf5_S1-c3-100-50 | 339                            | 0.2                                             | 0.37      | 613                                                                     | S1 / KY14-09     | 2014.07.22 | 30°N-145°E           | 100-50       | DF-03 |
|                              | tap2_inf1         | 360                            | ND                                              | –         | –                                                                       | KH-16-7          | 2016.12.07 | 28°37.6'N-143°55.4'E | Surface      | DF-03 |
|                              | mana_inf1         | 252                            | 0.7                                             | 0.15      | 601                                                                     | M1 / Manazuru    | 2017.07.13 | 35°09'N-139°10.5'E   | Surface      | DF-14 |
|                              | mana_inf2         | 234                            | 0.1                                             | –         | –                                                                       | M1 / Manazuru    | 2017.07.13 | 35°09'N-139°10.5'E   | Surface      | DF-14 |
|                              | 22413_inf1        | 329                            | 0.7                                             | 0.32      | 330                                                                     | 22413 / M140     | 2017.08.27 | 19°31.4'N-22°35.4'W  | 100-0        | DF-14 |
|                              | 22413_inf2        | 311                            | 0.9                                             | 0.32      | 288                                                                     | 22413 / M140     | 2017.08.27 | 19°31.4'N-22°35.4'W  | 100-0        | DF-14 |
| <i>Globorotalia menardii</i> |                   |                                |                                                 |           |                                                                         |                  |            |                      |              |       |
|                              | 0713-0612-mena    | 489                            | 1.3                                             | 0.47      | 693                                                                     | MR13-04          | 2013.07.13 | 31°44.5'E-144°27.5'E | Surface      | DF-03 |
|                              | 0713-0612-mena2   | 278                            | 0.6                                             | 0.43      | 663                                                                     | MR13-04          | 2013.07.13 | 31°44.5'E-144°27.5'E | Surface      | DF-03 |
|                              | 0718-0612-mena    | 422                            | 1.0                                             | 0.45      | 607                                                                     | MR13-04          | 2013.07.18 | 33°53.4'N-145°02.8'E | Surface      | DF-03 |
|                              | 2-mena1           | 464                            | 1.4                                             | 0.39      | 668                                                                     | MR14-02          | 2014.02.16 | 7°32.5'N-134°45'E    | Surface      | DF-03 |
|                              | 2-mena2           | 339                            | ND                                              | –         | –                                                                       | MR14-02          | 2014.02.16 | 7°32.5'N-134°45'E    | Surface      | DF-03 |
|                              | 5-mena3           | 482                            | 1.0                                             | 0.32      | 687                                                                     | MR14-02          | 2014.02.17 | 5°43.2'N-139°43.3'E  | Surface      | DF-03 |
|                              | 5-mena4           | 375                            | 0.9                                             | 0.40      | 696                                                                     | MR14-02          | 2014.02.17 | 5°43.2'N-139°43.3'E  | Surface      | DF-03 |
|                              | 8-mena6           | 607                            | 2.7                                             | 0.44      | 642                                                                     | MR14-02          | 2014.02.18 | 4°13.7'N-142°53.9'E  | Surface      | DF-03 |
|                              | 8-mena7           | 429                            | 1.4                                             | 0.44      | 715                                                                     | MR14-02          | 2014.02.18 | 4°13.7'N-142°53.9'E  | Surface      | DF-03 |
|                              | 9-mena8           | 446                            | 1.9                                             | 0.45      | 673                                                                     | MR14-02          | 2014.02.19 | 4°35.4'N-144°27.8'E  | Surface      | DF-03 |
|                              | 9-mena9           | 464                            | 1.1                                             | 0.42      | 571                                                                     | MR14-02          | 2014.02.19 | 4°35.4'N-144°27.8'E  | Surface      | DF-03 |
|                              | 19-mena10         | 304                            | 0.5                                             | 0.45      | 723                                                                     | MR14-02          | 2014.02.28 | 5°02'S-156°01.5'E    | Surface      | DF-03 |
|                              | 22-mena11         | 411                            | 0.5                                             | 0.44      | 626                                                                     | MR14-02          | 2014.03.03 | 0°30'S-156°E         | Surface      | DF-03 |
|                              | 34-mena12         | 446                            | 0.8                                             | 0.44      | 671                                                                     | MR14-02          | 2014.03.17 | 25°N-149°12'E        | Surface      | DF-03 |
|                              | 21-mena12         | 357                            | ND                                              | –         | –                                                                       | MR14-02          | 2014.03.02 | 1°30'S-156°E         | Surface      | DF-03 |
|                              | 150-100N_mena1    | 587                            | 2.1                                             | 0.28      | 829                                                                     | KS-16-9          | 2016.07.22 | 27°N-144°E           | 150-100      | DF-03 |
|                              | 100-50D_mena2     | 766                            | 2.4                                             | 0.24      | 530                                                                     | KS-16-9          | 2016.07.21 | 27°N-144°E           | 100-50       | DF-03 |
|                              | tap12_mena4       | 454                            | 0.1                                             | 0.57      | 649                                                                     | KH-16-7          | 2016.12.15 | 26°18'N-126°44'E     | Surface      | DF-03 |
|                              | St22402_mena3     | 561                            | 2.1                                             | 0.49      | 375                                                                     | 22402 / M140     | 2017.08.12 | 15°52.2'N-28°44.7'W  | 500-300      | DF-14 |
|                              | St22402_mena5     | 823                            | 2.2                                             | 0.46      | 698                                                                     | 22402 / M140     | 2017.08.12 | 15°52.2'N-28°44.7'W  | 100-80       | DF-14 |
|                              | St22402_mena7     | 612                            | 1.4                                             | 0.49      | 476                                                                     | 22402 / M140     | 2017.08.12 | 15°52.2'N-28°44.7'W  | 100-80       | DF-14 |
|                              | St22402_mena8     | 823                            | 2.3                                             | 0.47      | 445                                                                     | 22402 / M140     | 2017.08.12 | 15°52.2'N-28°44.7'W  | 100-80       | DF-14 |
|                              | St22402_mena10    | 792                            | 2.6                                             | 0.46      | 447                                                                     | 22402 / M140     | 2017.08.12 | 15°52.2'N-28°44.7'W  | 100-80       | DF-14 |
|                              | St22402_mena11    | 809                            | 2.0                                             | 0.47      | 388                                                                     | 22402 / M140     | 2017.08.12 | 15°52.2'N-28°44.7'W  | 100-80       | DF-14 |
|                              | St22402_mena12    | 606                            | 0.1                                             | –         | –                                                                       | 22402 / M140     | 2017.08.12 | 15°52.2'N-28°44.7'W  | 200-100      | DF-14 |
|                              | St22402_mena14    | 394                            | 1.1                                             | 0.44      | 489                                                                     | 22402 / M140     | 2017.08.12 | 15°52.2'N-28°44.7'W  | 200-100      | DF-14 |
|                              | St22402_mena15    | 409                            | 1.2                                             | 0.43      | 402                                                                     | 22402 / M140     | 2017.08.12 | 15°52.2'N-28°44.7'W  | 200-100      | DF-14 |
|                              | St22402_mena16    | 517                            | 1.4                                             | 0.48      | 443                                                                     | 22402 / M140     | 2017.08.12 | 15°52.2'N-28°44.7'W  | 200-100      | DF-14 |
|                              | St22402_mena17    | 402                            | 1.2                                             | 0.41      | 546                                                                     | 22402 / M140     | 2017.08.12 | 15°52.2'N-28°44.7'W  | 200-100      | DF-14 |

| Species | ID              | Test size<br>( $\mu\text{m}$ ) | Chl <i>a</i> (ng<br>foraminifer <sup>-1</sup> ) | $F_v/F_n$ | $\sigma_{\text{psfl}} (\times 10^{-20} \text{ m}^2 \text{ quanta}^{-1})$ | Station / Cruise | Date       | Latitude-Longitude  | Depth<br>(m) | FRRF  |
|---------|-----------------|--------------------------------|-------------------------------------------------|-----------|--------------------------------------------------------------------------|------------------|------------|---------------------|--------------|-------|
|         | St22402_mena18  | 1042                           | 4.7                                             | 0.48      | 387                                                                      | 22402 / M140     | 2017.08.12 | 15°52.2'N-28°44.7'W | 20-0         | DF-14 |
|         | St22402_mena19  | 788                            | 2.5                                             | 0.47      | 401                                                                      | 22402 / M140     | 2017.08.12 | 15°52.2'N-28°44.7'W | 20-0         | DF-14 |
|         | St22402_mena20  | 839                            | 3.0                                             | 0.50      | 440                                                                      | 22402 / M140     | 2017.08.12 | 15°52.2'N-28°44.7'W | 20-0         | DF-14 |
|         | St22402_mena21  | 958                            | 3.3                                             | 0.47      | 482                                                                      | 22402 / M140     | 2017.08.12 | 15°52.2'N-28°44.7'W | 20-0         | DF-14 |
|         | St22402_mena22  | 555                            | 0.2                                             | –         | –                                                                        | 22402 / M140     | 2017.08.12 | 15°52.2'N-28°44.7'W | 20-0         | DF-14 |
|         | St22402_mena23  | 895                            | 0.9                                             | 0.51      | 433                                                                      | 22402 / M140     | 2017.08.12 | 15°52.2'N-28°44.7'W | 20-0         | DF-14 |
|         | St22402_mena24  | 665                            | 2.6                                             | 0.50      | 454                                                                      | 22402 / M140     | 2017.08.12 | 15°52.2'N-28°44.7'W | 20-0         | DF-14 |
|         | St22402_mena25  | 432                            | 2.1                                             | 0.52      | 381                                                                      | 22402 / M140     | 2017.08.12 | 15°52.2'N-28°44.7'W | 20-0         | DF-14 |
|         | St22402_mena26  | 438                            | 1.0                                             | 0.33      | 405                                                                      | 22402 / M140     | 2017.08.12 | 15°52.2'N-28°44.7'W | 20-0         | DF-14 |
|         | St22402_mena27  | 408                            | 1.9                                             | 0.51      | 512                                                                      | 22402 / M140     | 2017.08.12 | 15°52.2'N-28°44.7'W | 20-0         | DF-14 |
|         | St22402_mena28  | 514                            | 1.6                                             | 0.54      | 401                                                                      | 22402 / M140     | 2017.08.12 | 15°52.2'N-28°44.7'W | 40-20        | DF-14 |
|         | St22402_mena29  | 574                            | 1.7                                             | 0.52      | 397                                                                      | 22402 / M140     | 2017.08.12 | 15°52.2'N-28°44.7'W | 40-20        | DF-14 |
|         | St22402_mena30  | 483                            | 3.3                                             | 0.52      | 624                                                                      | 22402 / M140     | 2017.08.12 | 15°52.2'N-28°44.7'W | 40-20        | DF-14 |
|         | St22402_mena31  | 673                            | 1.5                                             | 0.50      | 310                                                                      | 22402 / M140     | 2017.08.12 | 15°52.2'N-28°44.7'W | 40-20        | DF-14 |
|         | St22402_mena32  | 463                            | 1.0                                             | 0.54      | 559                                                                      | 22402 / M140     | 2017.08.12 | 15°52.2'N-28°44.7'W | 40-20        | DF-14 |
|         | St22402_mena34  | 905                            | 1.0                                             | 0.47      | 556                                                                      | 22402 / M140     | 2017.08.12 | 15°52.2'N-28°44.7'W | 80-60        | DF-14 |
|         | St22402_mena35  | 853                            | 2.2                                             | 0.51      | 660                                                                      | 22402 / M140     | 2017.08.12 | 15°52.2'N-28°44.7'W | 80-60        | DF-14 |
|         | St22402_mena36  | 831                            | 4.8                                             | 0.53      | 501                                                                      | 22402 / M140     | 2017.08.12 | 15°52.2'N-28°44.7'W | 80-60        | DF-14 |
|         | St22402_mena41  | 767                            | 2.9                                             | 0.54      | 567                                                                      | 22402 / M140     | 2017.08.12 | 15°52.2'N-28°44.7'W | 80-60        | DF-14 |
|         | St22402_mena42  | 914                            | 2.4                                             | 0.50      | 357                                                                      | 22402 / M140     | 2017.08.12 | 15°52.2'N-28°44.7'W | 80-60        | DF-14 |
|         | St22403_mena44  | 609                            | 2.3                                             | 0.49      | 440                                                                      | 22403 / M140     | 2017.08.13 | 14°47.4'N-32°31.1'W | 20-0         | DF-14 |
|         | St22403_mena46  | 721                            | 0.6                                             | 0.34      | 439                                                                      | 22403 / M140     | 2017.08.13 | 14°47.4'N-32°31.1'W | 80-60        | DF-14 |
|         | St22403_mena47  | 512                            | 3.0                                             | 0.51      | 372                                                                      | 22403 / M140     | 2017.08.13 | 14°47.4'N-32°31.1'W | 60-40        | DF-14 |
|         | St22403_mena49  | 930                            | 4.3                                             | 0.48      | 474                                                                      | 22403 / M140     | 2017.08.13 | 14°47.4'N-32°31.1'W | 100-80       | DF-14 |
|         | St22403_mena50  | 853                            | 1.9                                             | 0.36      | 388                                                                      | 22403 / M140     | 2017.08.13 | 14°47.4'N-32°31.1'W | 100-80       | DF-14 |
|         | St22403_mena51  | 374                            | 0.6                                             | 0.35      | 373                                                                      | 22403 / M140     | 2017.08.13 | 14°47.4'N-32°31.1'W | 100-80       | DF-14 |
|         | Stn22404_mena57 | 464                            | 0.1                                             | 0.53      | 732                                                                      | 22404 / M140     | 2017.08.14 | 13°43.3'N-36°12.9'W | 500-300      | DF-14 |
|         | Stn22404_mena58 | 507                            | 0.3                                             | –         | –                                                                        | 22404 / M140     | 2017.08.14 | 13°43.3'N-36°12.9'W | 300-200      | DF-14 |
|         | Stn22404_mena59 | 812                            | 0.4                                             | –         | –                                                                        | 22404 / M140     | 2017.08.14 | 13°43.3'N-36°12.9'W | 200-100      | DF-14 |
|         | Stn22404_mena60 | 465                            | 0.5                                             | –         | –                                                                        | 22404 / M140     | 2017.08.14 | 13°43.3'N-36°12.9'W | 200-100      | DF-14 |
|         | Stn22404_mena62 | 573                            | 0.7                                             | 0.51      | 652                                                                      | 22404 / M140     | 2017.08.14 | 13°43.3'N-36°12.9'W | 80-60        | DF-14 |
|         | Stn22404_mena63 | 455                            | 0.6                                             | 0.56      | 493                                                                      | 22404 / M140     | 2017.08.14 | 13°43.3'N-36°12.9'W | 80-60        | DF-14 |
|         | Stn22406_mena64 | 243                            | 0.7                                             | 0.50      | 459                                                                      | 22406 / M140     | 2017.08.17 | 12°18.6'N-36°56.6'W | 60-40        | DF-14 |
|         | Stn22407_mena65 | 855                            | 5.5                                             | 0.47      | 379                                                                      | 22407 / M140     | 2017.08.18 | 12°5.8'N-33°47.1'W  | 40-20        | DF-14 |
|         | Stn22407_mena66 | 259                            | 0.5                                             | 0.43      | 490                                                                      | 22407 / M140     | 2017.08.18 | 12°5.8'N-33°47.1'W  | 60-40        | DF-14 |
|         | Stn22408_mena69 | 424                            | 1.0                                             | 0.52      | 426                                                                      | 22408 / M140     | 2017.08.19 | 11°52.8'N-30°22.3'W | 20-0         | DF-14 |
|         | Stn22408_mena70 | 151                            | ND                                              | –         | –                                                                        | 22408 / M140     | 2017.08.19 | 11°52.8'N-30°22.3'W | 20-0         | DF-14 |
|         | Stn22408_mena71 | 123                            | 0.2                                             | 0.48      | 678                                                                      | 22408 / M140     | 2017.08.19 | 11°52.8'N-30°22.3'W | 20-0         | DF-14 |
|         | Stn22408_mena72 | 392                            | ND                                              | –         | –                                                                        | 22408 / M140     | 2017.08.19 | 11°52.8'N-30°22.3'W | 500-300      | DF-14 |
|         | Stn22408_mena73 | 440                            | 0.1                                             | –         | –                                                                        | 22408 / M140     | 2017.08.19 | 11°52.8'N-30°22.3'W | 500-300      | DF-14 |
|         | Stn22408_mena74 | 684                            | 1.4                                             | 0.32      | 470                                                                      | 22408 / M140     | 2017.08.19 | 11°52.8'N-30°22.3'W | 80-60        | DF-14 |
|         | Stn22408_mena75 | 710                            | 3.3                                             | 0.22      | 530                                                                      | 22408 / M140     | 2017.08.19 | 11°52.8'N-30°22.3'W | 80-60        | DF-14 |
|         | Stn22408_mena76 | 749                            | 2.7                                             | 0.53      | 577                                                                      | 22408 / M140     | 2017.08.19 | 11°52.8'N-30°22.3'W | 80-60        | DF-14 |
|         | Stn22408_mena77 | 228                            | 0.1                                             | –         | –                                                                        | 22408 / M140     | 2017.08.19 | 11°52.8'N-30°22.3'W | 20-0         | DF-14 |
|         | Stn22408_mena78 | 347                            | 0.5                                             | 0.54      | 474                                                                      | 22408 / M140     | 2017.08.19 | 11°52.8'N-30°22.3'W | 20-0         | DF-14 |
|         | Stn22408_mena79 | 270                            | 0.4                                             | 0.48      | 405                                                                      | 22408 / M140     | 2017.08.19 | 11°52.8'N-30°22.3'W | 20-0         | DF-14 |
|         | Stn22408_mena80 | 290                            | 0.4                                             | 0.53      | 531                                                                      | 22408 / M140     | 2017.08.19 | 11°52.8'N-30°22.3'W | 20-0         | DF-14 |
|         | Stn22408_mena81 | 160                            | 0.6                                             | 0.50      | 544                                                                      | 22408 / M140     | 2017.08.19 | 11°52.8'N-30°22.3'W | 20-0         | DF-14 |
|         | Stn22409_mena82 | 431                            | 1.7                                             | 0.50      | 365                                                                      | 22409 / M140     | 2017.08.20 | 11°41.3'N-26°39.7'W | 100-80       | DF-14 |
|         | Stn22409_mena83 | 669                            | 0.9                                             | 0.30      | 414                                                                      | 22409 / M140     | 2017.08.20 | 11°41.3'N-26°39.7'W | 60-40        | DF-14 |
|         | Stn22409_mena84 | 772                            | 2.9                                             | 0.53      | 589                                                                      | 22409 / M140     | 2017.08.20 | 11°41.3'N-26°39.7'W | 60-40        | DF-14 |
|         | Stn22409_mena85 | 782                            | 2.6                                             | 0.30      | 334                                                                      | 22409 / M140     | 2017.08.20 | 11°41.3'N-26°39.7'W | 60-40        | DF-14 |
|         | Stn22409_mena86 | 836                            | 1.0                                             | 0.31      | 338                                                                      | 22409 / M140     | 2017.08.20 | 11°41.3'N-26°39.7'W | 60-40        | DF-14 |
|         | Stn22409_mena87 | 710                            | 0.5                                             | –         | –                                                                        | 22409 / M140     | 2017.08.20 | 11°41.3'N-26°39.7'W | 40-20        | DF-14 |
|         | Stn22409_mena88 | 463                            | 2.8                                             | 0.53      | 422                                                                      | 22409 / M140     | 2017.08.20 | 11°41.3'N-26°39.7'W | 40-20        | DF-14 |
|         | Stn22409_mena89 | 350                            | 1.1                                             | 0.57      | 580                                                                      | 22409 / M140     | 2017.08.20 | 11°41.3'N-26°39.7'W | 40-20        | DF-14 |
|         | Stn22409_mena90 | 916                            | 4.5                                             | 0.52      | 395                                                                      | 22409 / M140     | 2017.08.20 | 11°41.3'N-26°39.7'W | 20-0         | DF-14 |
|         | Stn22409_mena91 | 520                            | 0.9                                             | 0.55      | 663                                                                      | 22409 / M140     | 2017.08.20 | 11°41.3'N-26°39.7'W | 20-0         | DF-14 |
|         | Stn22409_mena92 | 466                            | 2.8                                             | 0.55      | 371                                                                      | 22409 / M140     | 2017.08.20 | 11°41.3'N-26°39.7'W | 20-0         | DF-14 |
|         | Stn22409_mena93 | 301                            | 3.1                                             | 0.52      | 500                                                                      | 22409 / M140     | 2017.08.20 | 11°41.3'N-26°39.7'W | 20-0         | DF-14 |
|         | Stn22409_mena94 | 250                            | 0.4                                             | –         | –                                                                        | 22409 / M140     | 2017.08.20 | 11°41.3'N-26°39.7'W | 20-0         | DF-14 |
|         | Stn22409_mena95 | 254                            | 0.5                                             | 0.55      | 511                                                                      | 22409 / M140     | 2017.08.20 | 11°41.3'N-26°39.7'W | 20-0         | DF-14 |
|         | Stn22412_mena96 | 230                            | 0.5                                             | 0.56      | 578                                                                      | 22412 / M140     | 2017.08.25 | 14°6.4'N-23°44.5'W  | 20-0         | DF-14 |
|         | Stn22412_mena97 | 227                            | 0.3                                             | –         | –                                                                        | 22412 / M140     | 2017.08.25 | 14°6.4'N-23°44.5'W  | 20-0         | DF-14 |

| Species | ID               | Test size<br>( $\mu\text{m}$ ) | Chl <i>a</i> (ng<br>foraminifer <sup>-1</sup> ) | $F_v/F_n$ | $\sigma_{\text{psl}} (\times 10^{-20} \text{ m}^2 \text{ quanta}^{-1})$ | Station / Cruise | Date       | Latitude-Longitude  | Depth<br>(m) | FRRF  |
|---------|------------------|--------------------------------|-------------------------------------------------|-----------|-------------------------------------------------------------------------|------------------|------------|---------------------|--------------|-------|
|         | Stn22412_mena98  | 230                            | 0.6                                             | 0.45      | 468                                                                     | 22412 / M140     | 2017.08.25 | 14°6.4'N-23°44.5'W  | 20-0         | DF-14 |
|         | Stn22412_mena99  | 276                            | 0.5                                             | 0.55      | 344                                                                     | 22412 / M140     | 2017.08.25 | 14°6.4'N-23°44.5'W  | 20-0         | DF-14 |
|         | Stn22412_mena100 | 245                            | 0.3                                             | 0.65      | 675                                                                     | 22412 / M140     | 2017.08.25 | 14°6.4'N-23°44.5'W  | 20-0         | DF-14 |
|         | Stn22412_mena101 | 230                            | 0.5                                             | 0.51      | 608                                                                     | 22412 / M140     | 2017.08.25 | 14°6.4'N-23°44.5'W  | 20-0         | DF-14 |
|         | Stn22412_mena102 | 169                            | 0.6                                             | 0.46      | 552                                                                     | 22412 / M140     | 2017.08.25 | 14°6.4'N-23°44.5'W  | 20-0         | DF-14 |
|         | Stn22412_mena103 | 240                            | 0.1                                             | 0.48      | 502                                                                     | 22412 / M140     | 2017.08.25 | 14°6.4'N-23°44.5'W  | 20-0         | DF-14 |
|         | Stn22412_mena104 | 306                            | 0.4                                             | 0.51      | 483                                                                     | 22412 / M140     | 2017.08.25 | 14°6.4'N-23°44.5'W  | 40-20        | DF-14 |
|         | Stn22412_mena105 | 243                            | 1.5                                             | 0.52      | 524                                                                     | 22412 / M140     | 2017.08.25 | 14°6.4'N-23°44.5'W  | 40-20        | DF-14 |
|         | Stn22412_mena107 | 293                            | 0.5                                             | 0.56      | 556                                                                     | 22412 / M140     | 2017.08.25 | 14°6.4'N-23°44.5'W  | 40-20        | DF-14 |
|         | Stn22412_mena108 | 244                            | 0.2                                             | -         | -                                                                       | 22412 / M140     | 2017.08.25 | 14°6.4'N-23°44.5'W  | 40-20        | DF-14 |
|         | Stn22412_mena109 | 298                            | 0.3                                             | 0.47      | 631                                                                     | 22412 / M140     | 2017.08.25 | 14°6.4'N-23°44.5'W  | 60-40        | DF-14 |
|         | Stn22412_mena110 | 241                            | 0.4                                             | 0.49      | 508                                                                     | 22412 / M140     | 2017.08.25 | 14°6.4'N-23°44.5'W  | 60-40        | DF-14 |
|         | Stn22412_mena111 | 239                            | 0.4                                             | 0.52      | 527                                                                     | 22412 / M140     | 2017.08.25 | 14°6.4'N-23°44.5'W  | 200-100      | DF-14 |
|         | 22413_mena116_0  | 616                            | 2.4                                             | 0.52      | 558                                                                     | 22413 / M140     | 2017.08.27 | 19°31.4'N-22°35.4'W | 40-20        | DF-14 |
|         | 22413_mena117_0  | 532                            | 1.7                                             | 0.48      | 449                                                                     | 22413 / M140     | 2017.08.27 | 19°31.4'N-22°35.4'W | 40-20        | DF-14 |
|         | 22413_mena118_0  | 404                            | 0.9                                             | 0.49      | 368                                                                     | 22413 / M140     | 2017.08.27 | 19°31.4'N-22°35.4'W | 40-20        | DF-14 |
|         | 22413_mena119_0  | 482                            | 1.3                                             | 0.52      | 515                                                                     | 22413 / M140     | 2017.08.27 | 19°31.4'N-22°35.4'W | 20-0         | DF-14 |
|         | 22413_mena120_0  | 408                            | 0.5                                             | 0.48      | 395                                                                     | 22413 / M140     | 2017.08.27 | 19°31.4'N-22°35.4'W | 20-0         | DF-14 |
|         | 22413_mena121_0  | 392                            | 1.6                                             | 0.51      | 466                                                                     | 22413 / M140     | 2017.08.27 | 19°31.4'N-22°35.4'W | 20-0         | DF-14 |
|         | 22413_mena122_0  | 570                            | 1.7                                             | 0.50      | 430                                                                     | 22413 / M140     | 2017.08.27 | 19°31.4'N-22°35.4'W | 60-40        | DF-14 |
|         | 22413_mena123_0  | 441                            | 0.9                                             | 0.48      | 641                                                                     | 22413 / M140     | 2017.08.27 | 19°31.4'N-22°35.4'W | 60-40        | DF-14 |
|         | 22413_mena124_0  | 447                            | 0.7                                             | 0.53      | 537                                                                     | 22413 / M140     | 2017.08.27 | 19°31.4'N-22°35.4'W | 60-40        | DF-14 |
|         | 22413_mena125_0  | 431                            | 0.6                                             | 0.40      | 584                                                                     | 22413 / M140     | 2017.08.27 | 19°31.4'N-22°35.4'W | 80-60        | DF-14 |
|         | 22413_mena126_0  | 956                            | 3.4                                             | 0.44      | 499                                                                     | 22413 / M140     | 2017.08.27 | 19°31.4'N-22°35.4'W | 100-80       | DF-14 |
|         | 22413_mena127_0  | 863                            | 1.8                                             | 0.43      | 589                                                                     | 22413 / M140     | 2017.08.27 | 19°31.4'N-22°35.4'W | 100-80       | DF-14 |
|         | 22413_mena128_0  | 307                            | 0.4                                             | -         | -                                                                       | 22413 / M140     | 2017.08.27 | 19°31.4'N-22°35.4'W | 100-80       | DF-14 |
|         | 22413_mena129_0  | 426                            | 1.1                                             | 0.48      | 502                                                                     | 22413 / M140     | 2017.08.27 | 19°31.4'N-22°35.4'W | 300-200      | DF-14 |
|         | 22413_mena130_0  | 461                            | 0.8                                             | 0.38      | 421                                                                     | 22413 / M140     | 2017.08.27 | 19°31.4'N-22°35.4'W | 700-500      | DF-14 |
|         | 22413_mena132    | 326                            | ND                                              | -         | -                                                                       | 22413 / M140     | 2017.08.27 | 19°31.4'N-22°35.4'W | 300-200      | DF-14 |
|         | 22414_mena134    | 373                            | 1.6                                             | 0.55      | 483                                                                     | 22414 / M140     | 2017.08.28 | 21°14.3'N-21°2'W    | 40-20        | DF-14 |
|         | 22414_mena135    | 359                            | 1.3                                             | 0.51      | 469                                                                     | 22414 / M140     | 2017.08.28 | 21°14.3'N-21°2'W    | 40-20        | DF-14 |
|         | 22414_mena136    | 378                            | 1.6                                             | 0.50      | 484                                                                     | 22414 / M140     | 2017.08.28 | 21°14.3'N-21°2'W    | 40-20        | DF-14 |
|         | 22414_mena137    | 256                            | 1.3                                             | 0.57      | 545                                                                     | 22414 / M140     | 2017.08.28 | 21°14.3'N-21°2'W    | 40-20        | DF-14 |
|         | 22414_mena138    | 331                            | 1.3                                             | 0.51      | 518                                                                     | 22414 / M140     | 2017.08.28 | 21°14.3'N-21°2'W    | 40-20        | DF-14 |
|         | 22414_mena139    | 343                            | 1.1                                             | 0.49      | 394                                                                     | 22414 / M140     | 2017.08.28 | 21°14.3'N-21°2'W    | 40-20        | DF-14 |
|         | 22414_mena140    | 319                            | 1.0                                             | 0.55      | 453                                                                     | 22414 / M140     | 2017.08.28 | 21°14.3'N-21°2'W    | 40-20        | DF-14 |
|         | 22414_mena141    | 474                            | 2.6                                             | 0.57      | 516                                                                     | 22414 / M140     | 2017.08.28 | 21°14.3'N-21°2'W    | 40-20        | DF-14 |
|         | 22414_mena142    | 406                            | ND                                              | -         | -                                                                       | 22414 / M140     | 2017.08.28 | 21°14.3'N-21°2'W    | 40-20        | DF-14 |
|         | 22414_mena143    | 358                            | 1.4                                             | 0.57      | 618                                                                     | 22414 / M140     | 2017.08.28 | 21°14.3'N-21°2'W    | 40-20        | DF-14 |
|         | 22414_mena144    | 343                            | 1.0                                             | 0.60      | 459                                                                     | 22414 / M140     | 2017.08.28 | 21°14.3'N-21°2'W    | 40-20        | DF-14 |
|         | 22414_mena145    | 574                            | 2.0                                             | 0.53      | 494                                                                     | 22414 / M140     | 2017.08.28 | 21°14.3'N-21°2'W    | 20-0         | DF-14 |
|         | 22414_mena146    | 550                            | 1.5                                             | 0.56      | 469                                                                     | 22414 / M140     | 2017.08.28 | 21°14.3'N-21°2'W    | 20-0         | DF-14 |
|         | 22414_mena147    | 513                            | 1.8                                             | 0.54      | 622                                                                     | 22414 / M140     | 2017.08.28 | 21°14.3'N-21°2'W    | 20-0         | DF-14 |
|         | 22414_mena148    | 459                            | 1.5                                             | 0.54      | 470                                                                     | 22414 / M140     | 2017.08.28 | 21°14.3'N-21°2'W    | 20-0         | DF-14 |
|         | 22414_mena149    | 493                            | 1.6                                             | 0.54      | 503                                                                     | 22414 / M140     | 2017.08.28 | 21°14.3'N-21°2'W    | 20-0         | DF-14 |
|         | 22414_mena150    | 456                            | 1.7                                             | 0.60      | 440                                                                     | 22414 / M140     | 2017.08.28 | 21°14.3'N-21°2'W    | 20-0         | DF-14 |
|         | 22414_mena151    | 424                            | 1.8                                             | 0.54      | 392                                                                     | 22414 / M140     | 2017.08.28 | 21°14.3'N-21°2'W    | 20-0         | DF-14 |
|         | 22414_mena152    | 556                            | 2.2                                             | 0.51      | 440                                                                     | 22414 / M140     | 2017.08.28 | 21°14.3'N-21°2'W    | 20-0         | DF-14 |
|         | 22414_mena153    | 410                            | 1.3                                             | 0.54      | 398                                                                     | 22414 / M140     | 2017.08.28 | 21°14.3'N-21°2'W    | 20-0         | DF-14 |
|         | 22414_mena154    | 416                            | 1.3                                             | 0.56      | 485                                                                     | 22414 / M140     | 2017.08.28 | 21°14.3'N-21°2'W    | 20-0         | DF-14 |
|         | 22414_mena155    | 472                            | 3.0                                             | 0.49      | 528                                                                     | 22414 / M140     | 2017.08.28 | 21°14.3'N-21°2'W    | 20-0         | DF-14 |
|         | 22414_mena156    | 393                            | 0.9                                             | 0.55      | 498                                                                     | 22414 / M140     | 2017.08.28 | 21°14.3'N-21°2'W    | 20-0         | DF-14 |
|         | 22414_mena157    | 1274                           | 8.7                                             | 0.46      | 356                                                                     | 22414 / M140     | 2017.08.28 | 21°14.3'N-21°2'W    | 100-80       | DF-14 |
|         | 22414_mena158    | 512                            | 2.0                                             | 0.52      | 576                                                                     | 22414 / M140     | 2017.08.28 | 21°14.3'N-21°2'W    | 100-80       | DF-14 |
|         | 22414_mena159    | 456                            | 0.1                                             | -         | -                                                                       | 22414 / M140     | 2017.08.28 | 21°14.3'N-21°2'W    | 100-80       | DF-14 |
|         | 22414_mena160    | 515                            | 1.0                                             | 0.56      | 572                                                                     | 22414 / M140     | 2017.08.28 | 21°14.3'N-21°2'W    | 100-80       | DF-14 |
|         | 22414_mena161    | 453                            | 0.8                                             | 0.58      | 520                                                                     | 22414 / M140     | 2017.08.28 | 21°14.3'N-21°2'W    | 100-80       | DF-14 |
|         | 22414_mena162    | 286                            | 0.4                                             | -         | -                                                                       | 22414 / M140     | 2017.08.28 | 21°14.3'N-21°2'W    | 100-80       | DF-14 |
|         | 22414_mena163    | 310                            | 1.5                                             | 0.54      | 521                                                                     | 22414 / M140     | 2017.08.28 | 21°14.3'N-21°2'W    | 100-80       | DF-14 |
|         | 22414_mena164    | 280                            | 0.1                                             | -         | -                                                                       | 22414 / M140     | 2017.08.28 | 21°14.3'N-21°2'W    | 100-80       | DF-14 |
|         | 22414_mena165    | 262                            | 0.2                                             | 0.56      | 482                                                                     | 22414 / M140     | 2017.08.28 | 21°14.3'N-21°2'W    | 100-80       | DF-14 |
|         | 22414_mena166    | 555                            | 0.4                                             | 0.56      | 669                                                                     | 22414 / M140     | 2017.08.28 | 21°14.3'N-21°2'W    | 80-60        | DF-14 |
|         | 22414_mena167    | 547                            | 0.4                                             | 0.49      | 716                                                                     | 22414 / M140     | 2017.08.28 | 21°14.3'N-21°2'W    | 80-60        | DF-14 |
|         | 22414_mena169    | 815                            | 2.4                                             | 0.52      | 496                                                                     | 22414 / M140     | 2017.08.28 | 21°14.3'N-21°2'W    | 80-60        | DF-14 |

| Species                     | ID               | Test size<br>( $\mu\text{m}$ ) | Chl <i>a</i> (ng<br>foraminifer <sup>-1</sup> ) | $F_v/F_n$ | $\sigma_{\text{psl}} (\times 10^{-20} \text{ m}^2 \text{ quanta}^{-1})$ | Station / Cruise | Date       | Latitude-Longitude  | Depth<br>(m) | FRRF  |
|-----------------------------|------------------|--------------------------------|-------------------------------------------------|-----------|-------------------------------------------------------------------------|------------------|------------|---------------------|--------------|-------|
|                             | 22414_mena170    | 400                            | 0.5                                             | 0.46      | 396                                                                     | 22414 / M140     | 2017.08.28 | 21°14.3'N-21°2'W    | 80–60        | DF-14 |
|                             | 22414_mena171    | 425                            | 0.9                                             | 0.50      | 402                                                                     | 22414 / M140     | 2017.08.28 | 21°14.3'N-21°2'W    | 80–60        | DF-14 |
|                             | 22414_mena172    | 429                            | 1.4                                             | 0.46      | 369                                                                     | 22414 / M140     | 2017.08.28 | 21°14.3'N-21°2'W    | 60–40        | DF-14 |
|                             | 22414_mena173    | 467                            | 0.2                                             | –         | –                                                                       | 22414 / M140     | 2017.08.28 | 21°14.3'N-21°2'W    | 60–40        | DF-14 |
|                             | 22414_mena174    | 473                            | 0.4                                             | –         | –                                                                       | 22414 / M140     | 2017.08.28 | 21°14.3'N-21°2'W    | 60–40        | DF-14 |
|                             | 22414_mena175    | 443                            | 0.9                                             | 0.51      | 595                                                                     | 22414 / M140     | 2017.08.28 | 21°14.3'N-21°2'W    | 60–40        | DF-14 |
|                             | 22414_mena176    | 649                            | 2.5                                             | 0.54      | 535                                                                     | 22414 / M140     | 2017.08.28 | 21°14.3'N-21°2'W    | 60–40        | DF-14 |
|                             | 22414_mena177    | 508                            | 2.7                                             | 0.50      | 413                                                                     | 22414 / M140     | 2017.08.28 | 21°14.3'N-21°2'W    | 60–40        | DF-14 |
|                             | 22414_mena178    | 531                            | 2.2                                             | 0.55      | 571                                                                     | 22414 / M140     | 2017.08.28 | 21°14.3'N-21°2'W    | 60–40        | DF-14 |
|                             | 22414_mena179    | 506                            | 0.7                                             | 0.50      | 545                                                                     | 22414 / M140     | 2017.08.28 | 21°14.3'N-21°2'W    | 60–40        | DF-14 |
|                             | 22414_mena180    | 488                            | 1.5                                             | 0.53      | 739                                                                     | 22414 / M140     | 2017.08.28 | 21°14.3'N-21°2'W    | 60–40        | DF-14 |
|                             | 22414_mena181    | 511                            | 2.1                                             | 0.57      | 755                                                                     | 22414 / M140     | 2017.08.28 | 21°14.3'N-21°2'W    | 60–40        | DF-14 |
|                             | 22414_mena182    | 480                            | 1.5                                             | 0.51      | 491                                                                     | 22414 / M140     | 2017.08.28 | 21°14.3'N-21°2'W    | 60–40        | DF-14 |
|                             | 22414_mena183    | 390                            | 0.6                                             | 0.59      | 657                                                                     | 22414 / M140     | 2017.08.28 | 21°14.3'N-21°2'W    | 60–40        | DF-14 |
|                             | 22417_mena184    | 411                            | 1.3                                             | 0.50      | 435                                                                     | 22417 / M140     | 2017.08.31 | 20°52.1'N-18°56.3'W | 20–0         | DF-14 |
|                             | 22417_mena185    | 375                            | 1.0                                             | 0.48      | 389                                                                     | 22417 / M140     | 2017.08.31 | 20°52.1'N-18°56.3'W | 20–0         | DF-14 |
|                             | 22417_mena186    | 395                            | 0.5                                             | 0.43      | 441                                                                     | 22417 / M140     | 2017.08.31 | 20°52.1'N-18°56.3'W | 20–0         | DF-14 |
|                             | St11_mena1_0     | 861                            | 5.3                                             | 0.43      | 589                                                                     | St11 / KH-17-4   | 2017.09.12 | 21°30'N-170°W       | 100–0        | DF-14 |
|                             | St11_mena2_0     | 591                            | 0.2                                             | –         | –                                                                       | St11 / KH-17-4   | 2017.09.12 | 21°30'N-170°W       | 100–0        | DF-14 |
|                             | St11_mena3_0     | 692                            | 4.2                                             | 0.51      | 314                                                                     | St11 / KH-17-4   | 2017.09.12 | 21°30'N-170°W       | 100–0        | DF-14 |
|                             | St11_mena4_0     | 633                            | 3.8                                             | 0.52      | 549                                                                     | St11 / KH-17-4   | 2017.09.12 | 21°30'N-170°W       | 100–0        | DF-14 |
| <i>Globorotalia scitula</i> |                  |                                |                                                 |           |                                                                         |                  |            |                     |              |       |
|                             | St22403_scitu2   | 286                            | 0.4                                             | –         | –                                                                       | 22403 / M140     | 2017.08.13 | 14°47.4'N-32°31.1'W | 300–200      | DF-14 |
|                             | St22403_scitu3   | 263                            | 0.4                                             | –         | –                                                                       | 22403 / M140     | 2017.08.13 | 14°47.4'N-32°31.1'W | 300–200      | DF-14 |
|                             | Stn22406_scitu7  | 191                            | 0.3                                             | –         | –                                                                       | 22406 / M140     | 2017.08.17 | 12°18.6'N-36°56.6'W | 60–40        | DF-14 |
|                             | Stn22406_scitu8  | 148                            | 0.4                                             | –         | –                                                                       | 22406 / M140     | 2017.08.17 | 12°18.6'N-36°56.6'W | 40–20        | DF-14 |
|                             | Stn22406_scitu9  | 238                            | 0.4                                             | –         | –                                                                       | 22406 / M140     | 2017.08.17 | 12°18.6'N-36°56.6'W | 500–300      | DF-14 |
|                             | Stn22407_scitu10 | 216                            | 1.2                                             | –         | –                                                                       | 22407 / M140     | 2017.08.18 | 12°5.8'N-33°47.1'W  | 40–20        | DF-14 |
|                             | Stn22407_scitu11 | 212                            | 0.5                                             | –         | –                                                                       | 22407 / M140     | 2017.08.18 | 12°5.8'N-33°47.1'W  | 500–300      | DF-14 |
|                             | Stn22408_scitu13 | 252                            | 0.4                                             | –         | –                                                                       | 22408 / M140     | 2017.08.19 | 11°52.8'N-30°22.3'W | 700–500      | DF-14 |
|                             | Stn22408_scitu14 | 236                            | 0.3                                             | –         | –                                                                       | 22408 / M140     | 2017.08.19 | 11°52.8'N-30°22.3'W | 700–500      | DF-14 |
|                             | Stn22408_scitu15 | 210                            | 0.3                                             | –         | –                                                                       | 22408 / M140     | 2017.08.19 | 11°52.8'N-30°22.3'W | 300–200      | DF-14 |
|                             | Stn22408_scitu17 | 238                            | 0.4                                             | –         | –                                                                       | 22408 / M140     | 2017.08.19 | 11°52.8'N-30°22.3'W | 500–300      | DF-14 |
|                             | Stn22408_scitu18 | 242                            | 0.4                                             | –         | –                                                                       | 22408 / M140     | 2017.08.19 | 11°52.8'N-30°22.3'W | 500–300      | DF-14 |
|                             | Stn22408_scitu19 | 206                            | 0.4                                             | –         | –                                                                       | 22408 / M140     | 2017.08.19 | 11°52.8'N-30°22.3'W | 500–300      | DF-14 |
|                             | Stn22408_scitu20 | 205                            | 0.3                                             | –         | –                                                                       | 22408 / M140     | 2017.08.19 | 11°52.8'N-30°22.3'W | 500–300      | DF-14 |
|                             | Stn22408_scitu21 | 260                            | 0.5                                             | –         | –                                                                       | 22408 / M140     | 2017.08.19 | 11°52.8'N-30°22.3'W | 500–300      | DF-14 |
|                             | Stn22408_scitu22 | 278                            | 0.5                                             | –         | –                                                                       | 22408 / M140     | 2017.08.19 | 11°52.8'N-30°22.3'W | 500–300      | DF-14 |
|                             | Stn22408_scitu23 | 170                            | 0.4                                             | –         | –                                                                       | 22408 / M140     | 2017.08.19 | 11°52.8'N-30°22.3'W | 500–300      | DF-14 |
|                             | Stn22408_scitu24 | 180                            | 0.3                                             | –         | –                                                                       | 22408 / M140     | 2017.08.19 | 11°52.8'N-30°22.3'W | 500–300      | DF-14 |
|                             | Stn22412_scitu25 | 464                            | 0.5                                             | –         | –                                                                       | 22412 / M140     | 2017.08.25 | 14°6.4'N-23°44.5'W  | 700–500      | DF-14 |
|                             | Stn22412_scitu26 | 449                            | 0.5                                             | –         | –                                                                       | 22412 / M140     | 2017.08.25 | 14°6.4'N-23°44.5'W  | 700–500      | DF-14 |
|                             | Stn22412_scitu27 | 308                            | 0.3                                             | –         | –                                                                       | 22412 / M140     | 2017.08.25 | 14°6.4'N-23°44.5'W  | 700–500      | DF-14 |
|                             | Stn22412_scitu28 | 316                            | 0.5                                             | –         | –                                                                       | 22412 / M140     | 2017.08.25 | 14°6.4'N-23°44.5'W  | 700–500      | DF-14 |
|                             | Stn22412_scitu29 | 363                            | 0.4                                             | –         | –                                                                       | 22412 / M140     | 2017.08.25 | 14°6.4'N-23°44.5'W  | 700–500      | DF-14 |
|                             | Stn22412_scitu30 | 347                            | 0.4                                             | –         | –                                                                       | 22412 / M140     | 2017.08.25 | 14°6.4'N-23°44.5'W  | 700–500      | DF-14 |
|                             | Stn22412_scitu31 | 383                            | 0.8                                             | –         | –                                                                       | 22412 / M140     | 2017.08.25 | 14°6.4'N-23°44.5'W  | 500–300      | DF-14 |
|                             | Stn22412_scitu32 | 289                            | 0.6                                             | –         | –                                                                       | 22412 / M140     | 2017.08.25 | 14°6.4'N-23°44.5'W  | 500–300      | DF-14 |
|                             | Stn22412_scitu33 | 362                            | 0.5                                             | –         | –                                                                       | 22412 / M140     | 2017.08.25 | 14°6.4'N-23°44.5'W  | 500–300      | DF-14 |
|                             | Stn22412_scitu34 | 305                            | 0.4                                             | –         | –                                                                       | 22412 / M140     | 2017.08.25 | 14°6.4'N-23°44.5'W  | 500–300      | DF-14 |
|                             | Stn22412_scitu35 | 273                            | 0.4                                             | –         | –                                                                       | 22412 / M140     | 2017.08.25 | 14°6.4'N-23°44.5'W  | 500–300      | DF-14 |
|                             | Stn22412_scitu36 | 210                            | 0.5                                             | –         | –                                                                       | 22412 / M140     | 2017.08.25 | 14°6.4'N-23°44.5'W  | 500–300      | DF-14 |
|                             | Stn22412_scitu37 | 243                            | 0.4                                             | –         | –                                                                       | 22412 / M140     | 2017.08.25 | 14°6.4'N-23°44.5'W  | 200–100      | DF-14 |
|                             | Stn22412_scitu38 | 233                            | 0.4                                             | –         | –                                                                       | 22412 / M140     | 2017.08.25 | 14°6.4'N-23°44.5'W  | 200–100      | DF-14 |
|                             | Stn22412_scitu39 | 256                            | 0.5                                             | –         | –                                                                       | 22412 / M140     | 2017.08.25 | 14°6.4'N-23°44.5'W  | 200–100      | DF-14 |
|                             | Stn22412_scitu40 | 240                            | 0.4                                             | –         | –                                                                       | 22412 / M140     | 2017.08.25 | 14°6.4'N-23°44.5'W  | 200–100      | DF-14 |
|                             | Stn22412_scitu41 | 236                            | 0.5                                             | –         | –                                                                       | 22412 / M140     | 2017.08.25 | 14°6.4'N-23°44.5'W  | 200–100      | DF-14 |
|                             | 22413_scitu42    | 464                            | 0.5                                             | –         | –                                                                       | 22413 / M140     | 2017.08.27 | 19°31.4'N-22°35.4'W | 700–500      | DF-14 |
|                             | 22413_scitu43    | 413                            | 0.4                                             | –         | –                                                                       | 22413 / M140     | 2017.08.27 | 19°31.4'N-22°35.4'W | 700–500      | DF-14 |
|                             | 22413_scitu44    | 424                            | 0.6                                             | –         | –                                                                       | 22413 / M140     | 2017.08.27 | 19°31.4'N-22°35.4'W | 700–500      | DF-14 |
|                             | 22413_scitu45    | 379                            | 0.4                                             | –         | –                                                                       | 22413 / M140     | 2017.08.27 | 19°31.4'N-22°35.4'W | 700–500      | DF-14 |
|                             | 22413_scitu46    | 353                            | 0.6                                             | –         | –                                                                       | 22413 / M140     | 2017.08.27 | 19°31.4'N-22°35.4'W | 700–500      | DF-14 |
|                             | 22413_scitu47    | 373                            | 0.5                                             | –         | –                                                                       | 22413 / M140     | 2017.08.27 | 19°31.4'N-22°35.4'W | 700–500      | DF-14 |

| Species                              | ID                | Test size<br>( $\mu\text{m}$ ) | Chl <i>a</i> (ng<br>foraminifer <sup>-1</sup> ) | $F_v/F_n$ | $\sigma_{\text{psl}} (\times 10^{-20} \text{ m}^2 \text{ quanta}^{-1})$ | Station / Cruise | Date       | Latitude-Longitude  | Depth<br>(m) | FRRF  |
|--------------------------------------|-------------------|--------------------------------|-------------------------------------------------|-----------|-------------------------------------------------------------------------|------------------|------------|---------------------|--------------|-------|
|                                      | 22413_scitu48     | 334                            | 0.5                                             | –         | –                                                                       | 22413 / M140     | 2017.08.27 | 19°31.4'N-22°35.4'W | 700–500      | DF-14 |
|                                      | 22413_scitu49     | 378                            | 0.4                                             | –         | –                                                                       | 22413 / M140     | 2017.08.27 | 19°31.4'N-22°35.4'W | 700–500      | DF-14 |
|                                      | 22413_scitu50     | 341                            | 0.4                                             | –         | –                                                                       | 22413 / M140     | 2017.08.27 | 19°31.4'N-22°35.4'W | 700–500      | DF-14 |
|                                      | 22413_scitu51     | 357                            | 0.4                                             | –         | –                                                                       | 22413 / M140     | 2017.08.27 | 19°31.4'N-22°35.4'W | 700–500      | DF-14 |
|                                      | 22413_scitu52     | 299                            | 0.5                                             | –         | –                                                                       | 22413 / M140     | 2017.08.27 | 19°31.4'N-22°35.4'W | 700–500      | DF-14 |
|                                      | 22413_scitu53     | 399                            | 0.4                                             | –         | –                                                                       | 22413 / M140     | 2017.08.27 | 19°31.4'N-22°35.4'W | 700–500      | DF-14 |
|                                      | 22413_scitu54     | 381                            | 0.5                                             | –         | –                                                                       | 22413 / M140     | 2017.08.27 | 19°31.4'N-22°35.4'W | 700–500      | DF-14 |
|                                      | 22413_scitu55     | 334                            | 0.4                                             | –         | –                                                                       | 22413 / M140     | 2017.08.27 | 19°31.4'N-22°35.4'W | 700–500      | DF-14 |
|                                      | 22413_scitu56     | 354                            | 0.5                                             | –         | –                                                                       | 22413 / M140     | 2017.08.27 | 19°31.4'N-22°35.4'W | 700–500      | DF-14 |
|                                      | 22413_scitu57     | 370                            | 0.5                                             | –         | –                                                                       | 22413 / M140     | 2017.08.27 | 19°31.4'N-22°35.4'W | 700–500      | DF-14 |
|                                      | 22413_scitu58     | 274                            | 0.7                                             | –         | –                                                                       | 22413 / M140     | 2017.08.27 | 19°31.4'N-22°35.4'W | 700–500      | DF-14 |
|                                      | 22413_scitu59     | 278                            | 0.5                                             | –         | –                                                                       | 22413 / M140     | 2017.08.27 | 19°31.4'N-22°35.4'W | 700–500      | DF-14 |
|                                      | 22413_scitu60     | 319                            | 0.4                                             | –         | –                                                                       | 22413 / M140     | 2017.08.27 | 19°31.4'N-22°35.4'W | 700–500      | DF-14 |
|                                      | 22413_scitu61     | 373                            | 0.5                                             | –         | –                                                                       | 22413 / M140     | 2017.08.27 | 19°31.4'N-22°35.4'W | 700–500      | DF-14 |
|                                      | 22413_scitu62     | 287                            | 0.5                                             | –         | –                                                                       | 22413 / M140     | 2017.08.27 | 19°31.4'N-22°35.4'W | 700–500      | DF-14 |
|                                      | 22413_scitu63     | 355                            | 0.4                                             | –         | –                                                                       | 22413 / M140     | 2017.08.27 | 19°31.4'N-22°35.4'W | 700–500      | DF-14 |
|                                      | 22413_scitu64     | 298                            | 0.4                                             | –         | –                                                                       | 22413 / M140     | 2017.08.27 | 19°31.4'N-22°35.4'W | 700–500      | DF-14 |
|                                      | 22413_scitu65     | 285                            | 0.4                                             | –         | –                                                                       | 22413 / M140     | 2017.08.27 | 19°31.4'N-22°35.4'W | 700–500      | DF-14 |
| <i>Globorotalia crassaformis</i>     |                   |                                |                                                 |           |                                                                         |                  |            |                     |              |       |
|                                      | St22403_crassa1   | 369                            | 1.1                                             | –         | –                                                                       | 22403 / M140     | 2017.08.13 | 14°47.4'N-32°31.1'W | 60–40        | DF-14 |
|                                      | St22403_crassa4   | 404                            | 1.4                                             | –         | –                                                                       | 22403 / M140     | 2017.08.13 | 14°47.4'N-32°31.1'W | 60–40        | DF-14 |
|                                      | Stn22406_crassa5  | 384                            | 0.6                                             | –         | –                                                                       | 22406 / M140     | 2017.08.17 | 12°18.6'N-36°56.6'W | 500–300      | DF-14 |
|                                      | Stn22406_crassa6  | 374                            | 0.4                                             | –         | –                                                                       | 22406 / M140     | 2017.08.17 | 12°18.6'N-36°56.6'W | 500–300      | DF-14 |
|                                      | Stn22406_crassa7  | 355                            | 0.9                                             | –         | –                                                                       | 22406 / M140     | 2017.08.17 | 12°18.6'N-36°56.6'W | 200–100      | DF-14 |
|                                      | Stn22406_crassa8  | 188                            | 0.5                                             | –         | –                                                                       | 22406 / M140     | 2017.08.17 | 12°18.6'N-36°56.6'W | 200–100      | DF-14 |
|                                      | Stn22406_crassa9  | 382                            | 0.4                                             | –         | –                                                                       | 22406 / M140     | 2017.08.17 | 12°18.6'N-36°56.6'W | 700–500      | DF-14 |
|                                      | Stn22408_crassa10 | 424                            | 0.9                                             | –         | –                                                                       | 22408 / M140     | 2017.08.19 | 11°52.8'N-30°22.3'W | 500–300      | DF-14 |
|                                      | Stn22408_crassa11 | 422                            | 0.7                                             | –         | –                                                                       | 22408 / M140     | 2017.08.19 | 11°52.8'N-30°22.3'W | 500–300      | DF-14 |
|                                      | Stn22408_crassa12 | 333                            | 0.4                                             | –         | –                                                                       | 22408 / M140     | 2017.08.19 | 11°52.8'N-30°22.3'W | 80–60        | DF-14 |
|                                      | Stn22408_crassa13 | 391                            | 0.8                                             | –         | –                                                                       | 22408 / M140     | 2017.08.19 | 11°52.8'N-30°22.3'W | 700–500      | DF-14 |
|                                      | Stn22408_crassa14 | 517                            | 0.8                                             | –         | –                                                                       | 22408 / M140     | 2017.08.19 | 11°52.8'N-30°22.3'W | 700–500      | DF-14 |
|                                      | Stn22408_crassa15 | 587                            | 1.3                                             | –         | –                                                                       | 22408 / M140     | 2017.08.19 | 11°52.8'N-30°22.3'W | 500–300      | DF-14 |
|                                      | Stn22408_crassa16 | 512                            | 0.9                                             | –         | –                                                                       | 22408 / M140     | 2017.08.19 | 11°52.8'N-30°22.3'W | 500–300      | DF-14 |
|                                      | Stn22408_crassa17 | 571                            | 1.3                                             | –         | –                                                                       | 22408 / M140     | 2017.08.19 | 11°52.8'N-30°22.3'W | 500–300      | DF-14 |
| <i>Globorotalia truncatulinoides</i> |                   |                                |                                                 |           |                                                                         |                  |            |                     |              |       |
|                                      | S1-100-50_trun1   | 266                            | ND                                              | –         | –                                                                       | S1 / MR13-04     | 2013.07.13 | 30°N-145°E          | 100–50       | DF-03 |
|                                      | S1-300-200_trun1  | 444                            | 0.2                                             | –         | –                                                                       | S1 / MR13-04     | 2013.07.13 | 30°N-145°E          | 300–200      | DF-03 |
|                                      | S1-300-200_trun2  | 450                            | ND                                              | –         | –                                                                       | S1 / MR13-04     | 2013.07.13 | 30°N-145°E          | 300–200      | DF-03 |
|                                      | trun1_S2-200-100  | 429                            | 0.9                                             | –         | –                                                                       | S2 / KY14-09     | 2014.07.23 | 28°N-145°E          | 200–100      | DF-03 |
|                                      | trun2_S2-200-100  | 321                            | 0.5                                             | –         | –                                                                       | S2 / KY14-09     | 2014.07.23 | 28°N-145°E          | 200–100      | DF-03 |
|                                      | trun3_S2-200-100  | 393                            | 0.9                                             | –         | –                                                                       | S2 / KY14-09     | 2014.07.23 | 28°N-145°E          | 200–100      | DF-03 |
|                                      | trun4_S2-200-100  | 411                            | 0.5                                             | –         | –                                                                       | S2 / KY14-09     | 2014.07.23 | 28°N-145°E          | 200–100      | DF-03 |
|                                      | trun6_S2-200-100  | 357                            | 0.4                                             | –         | –                                                                       | S2 / KY14-09     | 2014.07.23 | 28°N-145°E          | 200–100      | DF-03 |
|                                      | trun7_S2-200-100  | 429                            | 0.8                                             | –         | –                                                                       | S2 / KY14-09     | 2014.07.23 | 28°N-145°E          | 200–100      | DF-03 |
|                                      | trun8_S2-200-100  | 339                            | 0.4                                             | –         | –                                                                       | S2 / KY14-09     | 2014.07.23 | 28°N-145°E          | 200–100      | DF-03 |
|                                      | trun9_S2-200-100  | 446                            | 0.4                                             | –         | –                                                                       | S2 / KY14-09     | 2014.07.23 | 28°N-145°E          | 200–100      | DF-03 |
|                                      | trun10_S2-200-100 | 321                            | 0.4                                             | –         | –                                                                       | S2 / KY14-09     | 2014.07.23 | 28°N-145°E          | 200–100      | DF-03 |
|                                      | trun11_S2-200-100 | 286                            | 0.2                                             | –         | –                                                                       | S2 / KY14-09     | 2014.07.23 | 28°N-145°E          | 200–100      | DF-03 |
|                                      | trun12_S2-200-100 | 411                            | 0.8                                             | –         | –                                                                       | S2 / KY14-09     | 2014.07.23 | 28°N-145°E          | 200–100      | DF-03 |
|                                      | trun13_S2-200-100 | 429                            | 0.3                                             | –         | –                                                                       | S2 / KY14-09     | 2014.07.23 | 28°N-145°E          | 200–100      | DF-03 |
|                                      | trun14_S2-300-200 | 482                            | ND                                              | –         | –                                                                       | S2 / KY14-09     | 2014.07.23 | 28°N-145°E          | 300–200      | DF-03 |
|                                      | trun15_S2-300-200 | 411                            | ND                                              | –         | –                                                                       | S2 / KY14-09     | 2014.07.23 | 28°N-145°E          | 300–200      | DF-03 |
|                                      | trun16_S2-300-200 | 429                            | 0.2                                             | –         | –                                                                       | S2 / KY14-09     | 2014.07.23 | 28°N-145°E          | 300–200      | DF-03 |
|                                      | trun17_S2-300-200 | 429                            | ND                                              | –         | –                                                                       | S2 / KY14-09     | 2014.07.23 | 28°N-145°E          | 300–200      | DF-03 |
|                                      | trun18_S2-300-200 | 411                            | ND                                              | –         | –                                                                       | S2 / KY14-09     | 2014.07.23 | 28°N-145°E          | 300–200      | DF-03 |
|                                      | trun19_S2-300-200 | 357                            | ND                                              | –         | –                                                                       | S2 / KY14-09     | 2014.07.23 | 28°N-145°E          | 300–200      | DF-03 |
|                                      | trun20_S2-300-200 | 196                            | ND                                              | –         | –                                                                       | S2 / KY14-09     | 2014.07.23 | 28°N-145°E          | 300–200      | DF-03 |
|                                      | trun21_S2-300-200 | 286                            | ND                                              | –         | –                                                                       | S2 / KY14-09     | 2014.07.23 | 28°N-145°E          | 300–200      | DF-03 |
|                                      | trun22_S2-300-200 | 304                            | ND                                              | –         | –                                                                       | S2 / KY14-09     | 2014.07.23 | 28°N-145°E          | 300–200      | DF-03 |
|                                      | trun23_S1-300-200 | 357                            | 0.2                                             | –         | –                                                                       | S1 / KY14-09     | 2014.07.22 | 30°N-145°E          | 300–200      | DF-03 |
|                                      | trun24_S1-300-200 | 446                            | 0.2                                             | –         | –                                                                       | S1 / KY14-09     | 2014.07.22 | 30°N-145°E          | 300–200      | DF-03 |
|                                      | trun25_S1-300-200 | 375                            | ND                                              | –         | –                                                                       | S1 / KY14-09     | 2014.07.22 | 30°N-145°E          | 300–200      | DF-03 |

| Species                | ID                | Test size<br>( $\mu\text{m}$ ) | Chl <i>a</i> (ng<br>foraminifer <sup>-1</sup> ) | $F_v/F_n$ | $\sigma_{\text{psfl}} (\times 10^{-20} \text{ m}^2 \text{ quanta}^{-1})$ | Station / Cruise | Date       | Latitude-Longitude  | Depth<br>(m) | FRRf  |
|------------------------|-------------------|--------------------------------|-------------------------------------------------|-----------|--------------------------------------------------------------------------|------------------|------------|---------------------|--------------|-------|
|                        | trun26_S1-300-200 | 357                            | ND                                              | –         | –                                                                        | S1 / KY14-09     | 2014.07.22 | 30°N-145°E          | 300–200      | DF-03 |
|                        | trun27_S1-300-200 | 411                            | ND                                              | –         | –                                                                        | S1 / KY14-09     | 2014.07.22 | 30°N-145°E          | 300–200      | DF-03 |
|                        | trun28_S1-300-200 | 321                            | ND                                              | –         | –                                                                        | S1 / KY14-09     | 2014.07.22 | 30°N-145°E          | 300–200      | DF-03 |
|                        | trun29_S1-200-100 | 464                            | 0.4                                             | –         | –                                                                        | S1 / KY14-09     | 2014.07.22 | 30°N-145°E          | 200–100      | DF-03 |
|                        | trun30_S1-200-100 | 411                            | 0.5                                             | –         | –                                                                        | S1 / KY14-09     | 2014.07.22 | 30°N-145°E          | 200–100      | DF-03 |
|                        | trun31_S1-200-100 | 411                            | 0.2                                             | –         | –                                                                        | S1 / KY14-09     | 2014.07.22 | 30°N-145°E          | 200–100      | DF-03 |
|                        | trun32_S1-200-100 | 536                            | 0.4                                             | –         | –                                                                        | S1 / KY14-09     | 2014.07.22 | 30°N-145°E          | 200–100      | DF-03 |
|                        | trun33_S1-200-100 | 482                            | 0.2                                             | –         | –                                                                        | S1 / KY14-09     | 2014.07.22 | 30°N-145°E          | 200–100      | DF-03 |
|                        | trun34_S1-200-100 | 429                            | ND                                              | –         | –                                                                        | S1 / KY14-09     | 2014.07.22 | 30°N-145°E          | 200–100      | DF-03 |
|                        | trun35_S1-200-100 | 268                            | ND                                              | –         | –                                                                        | S1 / KY14-09     | 2014.07.22 | 30°N-145°E          | 200–100      | DF-03 |
|                        | trun36_S1-200-100 | 143                            | ND                                              | –         | –                                                                        | S1 / KY14-09     | 2014.07.22 | 30°N-145°E          | 200–100      | DF-03 |
|                        | trun37_S1-200-100 | 339                            | ND                                              | –         | –                                                                        | S1 / KY14-09     | 2014.07.22 | 30°N-145°E          | 200–100      | DF-03 |
|                        | trun38_S1-200-100 | 304                            | ND                                              | –         | –                                                                        | S1 / KY14-09     | 2014.07.22 | 30°N-145°E          | 200–100      | DF-03 |
|                        | trun39_S1-200-100 | 268                            | ND                                              | –         | –                                                                        | S1 / KY14-09     | 2014.07.22 | 30°N-145°E          | 200–100      | DF-03 |
|                        | trun40_S1-200-100 | 464                            | ND                                              | –         | –                                                                        | S1 / KY14-09     | 2014.07.22 | 30°N-145°E          | 200–100      | DF-03 |
|                        | trun41_S1-200-100 | 286                            | ND                                              | –         | –                                                                        | S1 / KY14-09     | 2014.07.22 | 30°N-145°E          | 200–100      | DF-03 |
|                        | trun42_S1-100-50  | 464                            | ND                                              | –         | –                                                                        | S1 / KY14-09     | 2014.07.22 | 30°N-145°E          | 100–50       | DF-03 |
|                        | trun43_S1-100-50  | 429                            | ND                                              | –         | –                                                                        | S1 / KY14-09     | 2014.07.22 | 30°N-145°E          | 100–50       | DF-03 |
|                        | trun44_S1-100-50  | 161                            | ND                                              | –         | –                                                                        | S1 / KY14-09     | 2014.07.22 | 30°N-145°E          | 100–50       | DF-03 |
|                        | trun45_S1-100-50  | 411                            | ND                                              | –         | –                                                                        | S1 / KY14-09     | 2014.07.22 | 30°N-145°E          | 100–50       | DF-03 |
|                        | trun46_S1-100-50  | 339                            | 0.2                                             | –         | –                                                                        | S1 / KY14-09     | 2014.07.22 | 30°N-145°E          | 100–50       | DF-03 |
|                        | trun47_S1-100-50  | 304                            | ND                                              | –         | –                                                                        | S1 / KY14-09     | 2014.07.22 | 30°N-145°E          | 100–50       | DF-03 |
|                        | trun48_S1-100-50  | 232                            | ND                                              | –         | –                                                                        | S1 / KY14-09     | 2014.07.22 | 30°N-145°E          | 100–50       | DF-03 |
|                        | trun49_S1-100-50  | 196                            | ND                                              | –         | –                                                                        | S1 / KY14-09     | 2014.07.22 | 30°N-145°E          | 100–50       | DF-03 |
|                        | trun50_S1-100-50  | 250                            | 0.3                                             | –         | –                                                                        | S1 / KY14-09     | 2014.07.22 | 30°N-145°E          | 100–50       | DF-03 |
|                        | trun51_S1-100-50  | 232                            | ND                                              | –         | –                                                                        | S1 / KY14-09     | 2014.07.22 | 30°N-145°E          | 100–50       | DF-03 |
|                        | D150-100_trun1    | 375                            | ND                                              | –         | –                                                                        | KS-16-9          | 2016.07.21 | 27°N-144°E          | 150–100      | DF-03 |
|                        | D200-150_trun2    | 479                            | 0.6                                             | –         | –                                                                        | KS-16-9          | 2016.07.21 | 27°N-144°E          | 200–150      | DF-03 |
|                        | D200-150_trun3    | 443                            | 0.3                                             | –         | –                                                                        | KS-16-9          | 2016.07.21 | 27°N-144°E          | 200–150      | DF-03 |
|                        | D200-150_trun4    | 496                            | 0.2                                             | –         | –                                                                        | KS-16-9          | 2016.07.21 | 27°N-144°E          | 200–150      | DF-03 |
|                        | D200-150_trun5    | 475                            | ND                                              | –         | –                                                                        | KS-16-9          | 2016.07.21 | 27°N-144°E          | 200–150      | DF-03 |
|                        | D200-150_trun6    | 411                            | 0.3                                             | –         | –                                                                        | KS-16-9          | 2016.07.21 | 27°N-144°E          | 200–150      | DF-03 |
|                        | St11_trun1        | 325                            | ND                                              | –         | –                                                                        | St11 / KH-17-4   | 2017.09.12 | 21°30'N-170°W       | 100–0        | DF-14 |
| <i>Candeina nitida</i> |                   |                                |                                                 |           |                                                                          |                  |            |                     |              |       |
|                        | 4-can0            | 375                            | 6.3                                             | 0.40      | 402                                                                      | MR14-02          | 2014.02.16 | 6°40'N-138°55'E     | Surface      | DF-03 |
|                        | 4-can1            | 375                            | 6.0                                             | 0.39      | 472                                                                      | MR14-02          | 2014.02.16 | 6°40'N-138°55'E     | Surface      | DF-03 |
|                        | 9-can2            | 536                            | 5.9                                             | 0.38      | 616                                                                      | MR14-02          | 2014.02.19 | 4°35.4'N-144°27.8'E | Surface      | DF-03 |
|                        | 10-can3           | 321                            | 3.1                                             | 0.40      | 521                                                                      | MR14-02          | 2014.02.19 | 4°57.8'N-147°01.6'E | Surface      | DF-03 |
|                        | 11-can4           | 304                            | 4.1                                             | 0.51      | 489                                                                      | MR14-02          | 2014.02.20 | 2°30'N-147°E        | Surface      | DF-03 |
|                        | 29-can5           | 250                            | 1.6                                             | 0.44      | 440                                                                      | MR14-02          | 2014.03.12 | 7°58'N-156°2'E      | Surface      | DF-03 |
|                        | Stn22409_niti1    | 330                            | 0.7                                             | 0.45      | 409                                                                      | 22409 / M140     | 2017.08.20 | 11°41.3'N-26°39.7'W | 700–500      | DF-14 |
|                        | Stn22409_niti2    | 438                            | 0.1                                             | –         | –                                                                        | 22409 / M140     | 2017.08.20 | 11°41.3'N-26°39.7'W | 300–200      | DF-14 |
|                        | Stn22409_niti3    | 330                            | 0.8                                             | 0.46      | 504                                                                      | 22409 / M140     | 2017.08.20 | 11°41.3'N-26°39.7'W | 300–200      | DF-14 |
|                        | Stn22409_niti4    | 343                            | 0.3                                             | –         | –                                                                        | 22409 / M140     | 2017.08.20 | 11°41.3'N-26°39.7'W | 300–200      | DF-14 |
|                        | Stn22409_niti5    | 230                            | 0.1                                             | –         | –                                                                        | 22409 / M140     | 2017.08.20 | 11°41.3'N-26°39.7'W | 300–200      | DF-14 |
|                        | Stn22409_niti6    | 315                            | 0.2                                             | –         | –                                                                        | 22409 / M140     | 2017.08.20 | 11°41.3'N-26°39.7'W | 300–200      | DF-14 |
|                        | Stn22409_niti7    | 225                            | 0.1                                             | –         | –                                                                        | 22409 / M140     | 2017.08.20 | 11°41.3'N-26°39.7'W | 200–100      | DF-14 |
|                        | Stn22409_niti8    | 268                            | 1.8                                             | 0.46      | 271                                                                      | 22409 / M140     | 2017.08.20 | 11°41.3'N-26°39.7'W | 80–60        | DF-14 |
|                        | Stn22409_niti9    | 319                            | 2.0                                             | 0.46      | 275                                                                      | 22409 / M140     | 2017.08.20 | 11°41.3'N-26°39.7'W | 80–60        | DF-14 |
|                        | Stn22409_niti10   | 382                            | 0.7                                             | 0.53      | 416                                                                      | 22409 / M140     | 2017.08.20 | 11°41.3'N-26°39.7'W | 60–40        | DF-14 |
|                        | Stn22409_niti11   | 199                            | 2.1                                             | 0.49      | 319                                                                      | 22409 / M140     | 2017.08.20 | 11°41.3'N-26°39.7'W | 40–20        | DF-14 |
|                        | Stn22409_niti12   | 268                            | 1.8                                             | 0.49      | 290                                                                      | 22409 / M140     | 2017.08.20 | 11°41.3'N-26°39.7'W | 40–20        | DF-14 |
|                        | Stn22409_niti13   | 293                            | 1.9                                             | 0.44      | 275                                                                      | 22409 / M140     | 2017.08.20 | 11°41.3'N-26°39.7'W | 40–20        | DF-14 |
|                        | Stn22409_niti14   | 203                            | 2.3                                             | 0.50      | 302                                                                      | 22409 / M140     | 2017.08.20 | 11°41.3'N-26°39.7'W | 40–20        | DF-14 |
|                        | Stn22409_niti15   | 335                            | 0.8                                             | 0.50      | 377                                                                      | 22409 / M140     | 2017.08.20 | 11°41.3'N-26°39.7'W | 40–20        | DF-14 |
|                        | Stn22409_niti16   | 254                            | 1.8                                             | 0.52      | 287                                                                      | 22409 / M140     | 2017.08.20 | 11°41.3'N-26°39.7'W | 40–20        | DF-14 |
|                        | Stn22409_niti17   | 218                            | 1.0                                             | 0.56      | 454                                                                      | 22409 / M140     | 2017.08.20 | 11°41.3'N-26°39.7'W | 40–20        | DF-14 |
|                        | Stn22409_niti18   | 226                            | 1.0                                             | 0.50      | 312                                                                      | 22409 / M140     | 2017.08.20 | 11°41.3'N-26°39.7'W | 40–20        | DF-14 |
|                        | Stn22409_niti19   | 207                            | 1.0                                             | 0.49      | 255                                                                      | 22409 / M140     | 2017.08.20 | 11°41.3'N-26°39.7'W | 40–20        | DF-14 |
|                        | Stn22409_niti20   | 269                            | 0.6                                             | 0.57      | 361                                                                      | 22409 / M140     | 2017.08.20 | 11°41.3'N-26°39.7'W | 20–0         | DF-14 |
|                        | Stn22409_niti21   | 367                            | 2.6                                             | 0.49      | 396                                                                      | 22409 / M140     | 2017.08.20 | 11°41.3'N-26°39.7'W | 20–0         | DF-14 |
|                        | Stn22409_niti22   | 419                            | 6.6                                             | 0.52      | 353                                                                      | 22409 / M140     | 2017.08.20 | 11°41.3'N-26°39.7'W | 20–0         | DF-14 |
|                        | PP37_niti23       | 422                            | 2.7                                             | 0.46      | 343                                                                      | M140             | 2017.08.25 | 13°10.3'N-23°25.8'W | Surface      | DF-14 |

| Species                         | ID                  | Test size<br>( $\mu\text{m}$ ) | Chl <i>a</i> (ng<br>foraminifer <sup>-1</sup> ) | $F_v/F_n$ | $\sigma_{\text{psfl}} (\times 10^{-20} \text{ m}^2 \text{ quanta}^{-1})$ | Station / Cruise | Date       | Latitude-Longitude   | Depth<br>(m) | FRRF  |
|---------------------------------|---------------------|--------------------------------|-------------------------------------------------|-----------|--------------------------------------------------------------------------|------------------|------------|----------------------|--------------|-------|
|                                 | PP37_niti24         | 338                            | 1.3                                             | 0.51      | 263                                                                      | M140             | 2017.08.25 | 13°10.3'N-23°25.8'W  | Surface      | DF-14 |
|                                 | PP37_niti25         | 363                            | 3.0                                             | 0.52      | 317                                                                      | M140             | 2017.08.25 | 13°10.3'N-23°25.8'W  | Surface      | DF-14 |
|                                 | PP37_niti26         | 236                            | 0.6                                             | 0.53      | 355                                                                      | M140             | 2017.08.25 | 13°10.3'N-23°25.8'W  | Surface      | DF-14 |
|                                 | tap1_niti1_0        | 422                            | 1.3                                             | 0.35      | 380                                                                      | KH-17-4          | 2017.09.10 | 21°16.6'N-160°45'W   | Surface      | DF-14 |
|                                 | St11_niti2_0        | 380                            | 2.3                                             | 0.41      | 285                                                                      | St11 / KH-17-4   | 2017.09.12 | 21°30'N-170°W        | 100–50       | DF-14 |
|                                 | St11_niti3_0        | 219                            | 0.6                                             | 0.55      | 317                                                                      | St11 / KH-17-4   | 2017.09.12 | 21°30'N-170°W        | 50–20        | DF-14 |
|                                 | tap4_niti4_0        | 373                            | 4.2                                             | 0.50      | 346                                                                      | KH-17-4          | 2017.09.15 | 26°40.7'N-145°14.3'E | Surface      | DF-14 |
|                                 | St12_niti5_0        | 253                            | 0.2                                             | 0.43      | 257                                                                      | St12 / KH-17-4   | 2017.09.16 | 23°N-180°E/W         | 100–0        | DF-14 |
|                                 | St12_niti6_0        | 270                            | 0.1                                             | –         | –                                                                        | St12 / KH-17-4   | 2017.09.16 | 23°N-180°E/W         | 100–0        | DF-14 |
|                                 | St12_niti7_0        | 388                            | 0.5                                             | –         | –                                                                        | St12 / KH-17-4   | 2017.09.16 | 23°N-180°E/W         | 100–0        | DF-14 |
|                                 | St12_niti8_0        | 278                            | 0.1                                             | –         | –                                                                        | St12 / KH-17-4   | 2017.09.16 | 23°N-180°E/W         | 100–0        | DF-14 |
|                                 | St12_niti9          | 250                            | 0.7                                             | 0.34      | 428                                                                      | St12 / KH-17-4   | 2017.09.16 | 23°N-180°E/W         | 100–0        | DF-14 |
|                                 | St17_niti10_0       | 481                            | 6.5                                             | 0.42      | 349                                                                      | St17 / KH-17-4   | 2017.10.01 | 23°N-137°E           | 100–0        | DF-14 |
| <i>Globoigerinita glutinata</i> |                     |                                |                                                 |           |                                                                          |                  |            |                      |              |       |
|                                 | 0718-0006_glu       | 233                            | 0.8                                             | –         | –                                                                        | MR13-04          | 2013.07.18 | 32°32.5'N-144°36.4'E | Surface      | DF-03 |
|                                 | 0719-0612_glu       | 311                            | 2.2                                             | 0.48      | 627                                                                      | MR13-04          | 2013.07.19 | 38°05'N-146°25'E     | Surface      | DF-03 |
|                                 | 0719-1218_glu       | 233                            | 0.5                                             | 0.44      | 609                                                                      | MR13-04          | 2013.07.19 | 39°02'N-147°53.3'E   | Surface      | DF-03 |
|                                 | 0723-0712_glu       | 220                            | 0.1                                             | –         | –                                                                        | MR13-04          | 2013.07.23 | 47°N-160°E           | Surface      | DF-03 |
|                                 | 0723-0712_glu2      | 220                            | ND                                              | –         | –                                                                        | MR13-04          | 2013.07.23 | 47°N-160°E           | Surface      | DF-03 |
|                                 | 0724-1206_glu       | 233                            | ND                                              | –         | –                                                                        | MR13-04          | 2013.07.24 | 47°N-160°E           | Surface      | DF-03 |
|                                 | 0727-0006_glu       | 144                            | ND                                              | –         | –                                                                        | MR13-04          | 2013.07.27 | 41°15'N-146°43'E     | Surface      | DF-03 |
|                                 | K2-c2-50-100_glu1   | 222                            | 0.2                                             | –         | –                                                                        | K2 / MR13-04     | 2013.07.23 | 47°N-160°E           | 100–50       | DF-03 |
|                                 | K2-c2-50-100_glu2   | 222                            | 0.1                                             | –         | –                                                                        | K2 / MR13-04     | 2013.07.23 | 47°N-160°E           | 100–50       | DF-03 |
|                                 | K2-c2-50-100_glu3   | 255                            | 0.1                                             | –         | –                                                                        | K2 / MR13-04     | 2013.07.23 | 47°N-160°E           | 100–50       | DF-03 |
|                                 | K2-c2-50-100_glu4   | 266                            | 0.2                                             | –         | –                                                                        | K2 / MR13-04     | 2013.07.23 | 47°N-160°E           | 100–50       | DF-03 |
|                                 | K2-c1-0-50_4dex-glu | 255                            | 0.2                                             | –         | –                                                                        | K2 / MR13-04     | 2013.07.22 | 47°N-160°E           | 50–0         | DF-03 |
|                                 | 8-glu1              | 268                            | 0.7                                             | 0.49      | 613                                                                      | MR14-02          | 2014.02.18 | 4°13.7'N-142°53.9'E  | Surface      | DF-03 |
|                                 | 8-glu2              | 321                            | ND                                              | –         | –                                                                        | MR14-02          | 2014.02.18 | 4°13.7'N-142°53.9'E  | Surface      | DF-03 |
|                                 | 14-glu3             | 196                            | 0.3                                             | 0.54      | 585                                                                      | MR14-02          | 2014.02.23 | 0°1.5'S-147°E        | Surface      | DF-03 |
|                                 | 13-glu4             | 268                            | 0.2                                             | 0.44      | 423                                                                      | MR14-02          | 2014.02.22 | 0°N/S-147°E          | Surface      | DF-03 |
|                                 | 13-glu5             | 214                            | ND                                              | –         | –                                                                        | MR14-02          | 2014.02.22 | 0°N/S-147°E          | Surface      | DF-03 |
|                                 | 13-glu6             | 161                            | ND                                              | –         | –                                                                        | MR14-02          | 2014.02.22 | 0°N/S-147°E          | Surface      | DF-03 |
|                                 | 17-glu7             | 321                            | ND                                              | –         | –                                                                        | MR14-02          | 2014.02.26 | 4°58'S-154°44'E      | Surface      | DF-03 |
|                                 | 34-glu7             | 268                            | 0.6                                             | 0.44      | 594                                                                      | MR14-02          | 2014.03.17 | 25°N-149°12'E        | Surface      | DF-03 |
|                                 | 2-glu               | 190                            | 0.2                                             | 0.50      | 615                                                                      | Sagami Bay       | 2013.08.05 | 35°10'N-139°11'E     | Surface      | DF-03 |
|                                 | 3-glu               | 245                            | ND                                              | –         | –                                                                        | Sagami Bay       | 2013.08.05 | 35°10'N-139°11'E     | Surface      | DF-03 |
|                                 | 4-glu               | 207                            | 0.1                                             | –         | –                                                                        | Sagami Bay       | 2013.08.05 | 35°10'N-139°11'E     | Surface      | DF-03 |
|                                 | SSK-glu_DNA-1       | 214                            | 0.7                                             | 0.49      | 558                                                                      | Sesoko           | 2013.11.29 | 26°37.3'N-127°52.3'E | Surface      | DF-03 |
|                                 | SSK-glu_DNA-2       | 250                            | 0.6                                             | 0.46      | 562                                                                      | Sesoko           | 2013.11.29 | 26°37.3'N-127°52.3'E | Surface      | DF-03 |
|                                 | SSK-glu_DNA-3       | 214                            | 0.5                                             | 0.48      | 563                                                                      | Sesoko           | 2013.11.29 | 26°37.3'N-127°52.3'E | Surface      | DF-03 |
|                                 | S1-200-100_glu      | 232                            | ND                                              | –         | –                                                                        | S1 / KY14-09     | 2014.07.22 | 30°N-145°E           | 200–100      | DF-03 |
|                                 | S1-200-100_glu2     | 250                            | ND                                              | –         | –                                                                        | S1 / KY14-09     | 2014.07.22 | 30°N-145°E           | 200–100      | DF-03 |
|                                 | S1-100-50_glu3      | 161                            | ND                                              | –         | –                                                                        | S1 / KY14-09     | 2014.07.22 | 30°N-145°E           | 100–50       | DF-03 |
|                                 | S1-100-50_glu4      | 179                            | 0.2                                             | 0.49      | 586                                                                      | S1 / KY14-09     | 2014.07.22 | 30°N-145°E           | 100–50       | DF-03 |
|                                 | S1-50-20_glu5       | 125                            | ND                                              | –         | –                                                                        | S1 / KY14-09     | 2014.07.22 | 30°N-145°E           | 50–20        | DF-03 |
|                                 | S1-50-20_glu6       | 143                            | 0.2                                             | 0.40      | 789                                                                      | S1 / KY14-09     | 2014.07.22 | 30°N-145°E           | 50–20        | DF-03 |
|                                 | S2-200-100-c2_glu7  | 143                            | 0.3                                             | 0.38      | 453                                                                      | S2 / KY14-09     | 2014.07.23 | 28°N-145°E           | 200–100      | DF-03 |
|                                 | S2-200-100-c2_glu8  | 161                            | 0.4                                             | 0.39      | 639                                                                      | S2 / KY14-09     | 2014.07.23 | 28°N-145°E           | 200–100      | DF-03 |
|                                 | S2-200-100-c2_glu9  | 143                            | 0.3                                             | 0.34      | 840                                                                      | S2 / KY14-09     | 2014.07.23 | 28°N-145°E           | 200–100      | DF-03 |
|                                 | S2-100-50-c2_glu10  | 179                            | 0.6                                             | 0.31      | 745                                                                      | S2 / KY14-09     | 2014.07.23 | 28°N-145°E           | 100–50       | DF-03 |
|                                 | S2-100-50-c2_glu11  | 161                            | 0.3                                             | 0.38      | 746                                                                      | S2 / KY14-09     | 2014.07.23 | 28°N-145°E           | 100–50       | DF-03 |
|                                 | S2-50-0-c2_glu12    | 161                            | 0.4                                             | 0.43      | 677                                                                      | S2 / KY14-09     | 2014.07.23 | 28°N-145°E           | 50–0         | DF-03 |
|                                 | S2-50-0-c2_glu13    | 179                            | 0.7                                             | 0.43      | 704                                                                      | S2 / KY14-09     | 2014.07.23 | 28°N-145°E           | 50–0         | DF-03 |
|                                 | S2-50-0-c2_glu14    | 143                            | 0.4                                             | 0.48      | 714                                                                      | S2 / KY14-09     | 2014.07.23 | 28°N-145°E           | 50–0         | DF-03 |
|                                 | S1-50-0-c3_glu15    | 196                            | ND                                              | –         | –                                                                        | S1 / KY14-09     | 2014.07.22 | 30°N-145°E           | 50–0         | DF-03 |
|                                 | tap3_glu1           | 279                            | 1.1                                             | 0.48      | 850                                                                      | KS-16-9          | 2016.07.19 | 32°09.7'N-142°04.2'E | Surface      | DF-03 |
|                                 | tap6_glu2           | 243                            | 1.3                                             | 0.54      | 828                                                                      | KS-16-9          | 2016.07.20 | 27°42.1'N-143°43.1'E | Surface      | DF-03 |
|                                 | 20-0D_glu5          | 177                            | 0.5                                             | 0.31      | 831                                                                      | KS-16-9          | 2016.07.21 | 27°N-144°E           | 20–0         | DF-03 |
|                                 | 20-0D_glu6          | 195                            | 0.2                                             | –         | –                                                                        | KS-16-9          | 2016.07.21 | 27°N-144°E           | 20–0         | DF-03 |
|                                 | tap2_glu1           | 196                            | 0.5                                             | 0.42      | 890                                                                      | KH-16-7          | 2016.12.07 | 28°37.6'N-143°55.4'E | Surface      | DF-03 |
|                                 | N02-50-20_glu2      | 197                            | 0.3                                             | 0.48      | 581                                                                      | N02 / KH-16-7    | 2016.12.10 | 23°N-141°E           | 50–20        | DF-03 |
|                                 | N02-50-20_glu3      | 166                            | 0.5                                             | 0.41      | 789                                                                      | N02 / KH-16-7    | 2016.12.10 | 23°N-141°E           | 50–20        | DF-03 |
|                                 | RM1_glu4            | 243                            | 1.5                                             | 0.51      | 835                                                                      | RM1 / KH-16-7    | 2016.12.21 | 25°49'N-126°55'E     | 100–0        | DF-03 |

| Species                    | ID                  | Test size<br>( $\mu\text{m}$ ) | Chl <i>a</i> (ng<br>foraminifer <sup>-1</sup> ) | $F_v/F_n$ | $\sigma_{\text{psl}} (\times 10^{-20} \text{ m}^2 \text{ quanta}^{-1})$ | Station / Cruise | Date       | Latitude-Longitude   | Depth<br>(m) | FRRf  |
|----------------------------|---------------------|--------------------------------|-------------------------------------------------|-----------|-------------------------------------------------------------------------|------------------|------------|----------------------|--------------|-------|
|                            | RM1_glu5            | 230                            | 1.1                                             | 0.51      | 776                                                                     | RM1 / KH-16-7    | 2016.12.21 | 25°49'N-126°55'E     | 100-0        | DF-03 |
|                            | RM1_glu6            | 207                            | 0.7                                             | 0.53      | 743                                                                     | RM1 / KH-16-7    | 2016.12.21 | 25°49'N-126°55'E     | 100-0        | DF-03 |
|                            | RM1_glu7            | 244                            | 1.4                                             | 0.47      | 834                                                                     | RM1 / KH-16-7    | 2016.12.21 | 25°49'N-126°55'E     | 100-0        | DF-03 |
|                            | RM1_glu8            | 254                            | 0.8                                             | 0.57      | 685                                                                     | RM1 / KH-16-7    | 2016.12.21 | 25°49'N-126°55'E     | 100-0        | DF-03 |
|                            | RM1_glu9            | 252                            | 0.9                                             | 0.50      | 737                                                                     | RM1 / KH-16-7    | 2016.12.21 | 25°49'N-126°55'E     | 100-0        | DF-03 |
|                            | RM1_glu10           | 216                            | 1.1                                             | 0.53      | 732                                                                     | RM1 / KH-16-7    | 2016.12.21 | 25°49'N-126°55'E     | 100-0        | DF-03 |
|                            | RM1_glu11           | 246                            | 0.8                                             | 0.54      | 776                                                                     | RM1 / KH-16-7    | 2016.12.21 | 25°49'N-126°55'E     | 100-0        | DF-03 |
|                            | RM1_glu12           | 201                            | 0.7                                             | 0.51      | 721                                                                     | RM1 / KH-16-7    | 2016.12.21 | 25°49'N-126°55'E     | 100-0        | DF-03 |
|                            | RM1_glu13           | 211                            | 1.0                                             | 0.48      | 812                                                                     | RM1 / KH-16-7    | 2016.12.21 | 25°49'N-126°55'E     | 100-0        | DF-03 |
|                            | RM1_glu14           | 209                            | 0.8                                             | 0.55      | 750                                                                     | RM1 / KH-16-7    | 2016.12.21 | 25°49'N-126°55'E     | 100-0        | DF-03 |
|                            | RM1_glu15           | 166                            | 0.5                                             | 0.50      | 749                                                                     | RM1 / KH-16-7    | 2016.12.21 | 25°49'N-126°55'E     | 100-0        | DF-03 |
|                            | RM1_glu16           | 233                            | 1.0                                             | 0.47      | 874                                                                     | RM1 / KH-16-7    | 2016.12.21 | 25°49'N-126°55'E     | 100-0        | DF-03 |
|                            | RM1_glu17           | 200                            | 0.6                                             | 0.50      | 761                                                                     | RM1 / KH-16-7    | 2016.12.21 | 25°49'N-126°55'E     | 100-0        | DF-03 |
|                            | RM1_glu18           | 178                            | 0.5                                             | 0.50      | 739                                                                     | RM1 / KH-16-7    | 2016.12.21 | 25°49'N-126°55'E     | 100-0        | DF-03 |
|                            | RM1_glu19           | 246                            | 1.1                                             | 0.49      | 804                                                                     | RM1 / KH-16-7    | 2016.12.21 | 25°49'N-126°55'E     | 100-0        | DF-03 |
|                            | RM1_glu20           | 180                            | 0.5                                             | 0.51      | 657                                                                     | RM1 / KH-16-7    | 2016.12.21 | 25°49'N-126°55'E     | 100-0        | DF-03 |
|                            | RM1_glu21           | 247                            | 0.8                                             | 0.53      | 698                                                                     | RM1 / KH-16-7    | 2016.12.21 | 25°49'N-126°55'E     | 100-0        | DF-03 |
|                            | mana_glu1           | 187                            | 0.1                                             | –         | –                                                                       | M1 / Manazuru    | 2017.07.13 | 35°09'N-139°10.5'E   | Surface      | DF-14 |
|                            | mana_glu2           | 286                            | 1.7                                             | 0.56      | 538                                                                     | M1 / Manazuru    | 2017.07.13 | 35°09'N-139°10.5'E   | Surface      | DF-14 |
|                            | St22403_glu1        | 144                            | 0.5                                             | 0.53      | 632                                                                     | 22403 / M140     | 2017.08.13 | 14°47.4'N-32°31.1'W  | 80-60        | DF-14 |
|                            | Stn22407_glu2       | 137                            | 0.6                                             | 0.58      | 409                                                                     | 22407 / M140     | 2017.08.18 | 12°5.8'N-33°47.1'W   | 40-20        | DF-14 |
|                            | Stn22407_glu3       | 141                            | 0.9                                             | 0.53      | 479                                                                     | 22407 / M140     | 2017.08.18 | 12°5.8'N-33°47.1'W   | 60-40        | DF-14 |
|                            | Stn22407_glu5       | 145                            | 0.5                                             | 0.53      | 715                                                                     | 22407 / M140     | 2017.08.18 | 12°5.8'N-33°47.1'W   | 60-40        | DF-14 |
|                            | Stn22407_glu6       | 139                            | 0.1                                             | –         | –                                                                       | 22407 / M140     | 2017.08.18 | 12°5.8'N-33°47.1'W   | 200-100      | DF-14 |
|                            | Stn22407_glu7       | 132                            | 0.1                                             | –         | –                                                                       | 22407 / M140     | 2017.08.18 | 12°5.8'N-33°47.1'W   | 200-100      | DF-14 |
|                            | Stn22407_glu8       | 162                            | 0.1                                             | –         | –                                                                       | 22407 / M140     | 2017.08.18 | 12°5.8'N-33°47.1'W   | 200-100      | DF-14 |
|                            | Stn22407_glu9       | 123                            | 0.4                                             | 0.54      | 588                                                                     | 22407 / M140     | 2017.08.18 | 12°5.8'N-33°47.1'W   | 60-40        | DF-14 |
|                            | Stn22407_glu10      | 157                            | 0.3                                             | –         | –                                                                       | 22407 / M140     | 2017.08.18 | 12°5.8'N-33°47.1'W   | 60-40        | DF-14 |
|                            | Stn22407_glu11      | 134                            | ND                                              | –         | –                                                                       | 22407 / M140     | 2017.08.18 | 12°5.8'N-33°47.1'W   | 60-40        | DF-14 |
|                            | Stn22407_glu12      | 116                            | 0.5                                             | 0.53      | 596                                                                     | 22407 / M140     | 2017.08.18 | 12°5.8'N-33°47.1'W   | 80-60        | DF-14 |
|                            | Stn22407_glu13      | 203                            | 0.1                                             | –         | –                                                                       | 22407 / M140     | 2017.08.18 | 12°5.8'N-33°47.1'W   | 100-80       | DF-14 |
|                            | Stn22407_glu14      | 170                            | 0.6                                             | 0.61      | 592                                                                     | 22407 / M140     | 2017.08.18 | 12°5.8'N-33°47.1'W   | 20-0         | DF-14 |
|                            | Stn22407_glu15      | 166                            | 0.5                                             | 0.57      | 511                                                                     | 22407 / M140     | 2017.08.18 | 12°5.8'N-33°47.1'W   | 20-0         | DF-14 |
|                            | Stn22407_glu16      | 145                            | 0.5                                             | 0.51      | 505                                                                     | 22407 / M140     | 2017.08.18 | 12°5.8'N-33°47.1'W   | 20-0         | DF-14 |
|                            | Stn22407_glu17      | 169                            | 0.5                                             | 0.52      | 314                                                                     | 22407 / M140     | 2017.08.18 | 12°5.8'N-33°47.1'W   | 20-0         | DF-14 |
|                            | Stn22407_glu18      | 160                            | 0.8                                             | 0.57      | 510                                                                     | 22407 / M140     | 2017.08.18 | 12°5.8'N-33°47.1'W   | 20-0         | DF-14 |
|                            | 22414_glu19         | 238                            | 0.7                                             | 0.50      | 505                                                                     | 22414 / M140     | 2017.08.28 | 21°14.3'N-21°2'W     | 20-0         | DF-14 |
|                            | 22414_glu20         | 217                            | 0.8                                             | 0.55      | 508                                                                     | 22414 / M140     | 2017.08.28 | 21°14.3'N-21°2'W     | 20-0         | DF-14 |
|                            | 22414_glu21         | 175                            | 0.7                                             | 0.60      | 477                                                                     | 22414 / M140     | 2017.08.28 | 21°14.3'N-21°2'W     | 20-0         | DF-14 |
|                            | 22414_glu22         | 172                            | 0.4                                             | 0.58      | 416                                                                     | 22414 / M140     | 2017.08.28 | 21°14.3'N-21°2'W     | 20-0         | DF-14 |
|                            | 22414_glu23         | 173                            | ND                                              | –         | –                                                                       | 22414 / M140     | 2017.08.28 | 21°14.3'N-21°2'W     | 80-60        | DF-14 |
|                            | 22414_glu24         | 170                            | 0.1                                             | –         | –                                                                       | 22414 / M140     | 2017.08.28 | 21°14.3'N-21°2'W     | 80-60        | DF-14 |
|                            | 22417_glu25_0       | 296                            | ND                                              | –         | –                                                                       | 22414 / M140     | 2017.08.28 | 21°14.3'N-21°2'W     | 20-0         | DF-14 |
|                            | 22417_glu26_0       | 198                            | 1.1                                             | 0.60      | 485                                                                     | 22417 / M140     | 2017.08.31 | 20°52.1'N-18°56.3'W  | 20-0         | DF-14 |
|                            | 22417_glu27_0       | 231                            | 1.1                                             | 0.56      | 471                                                                     | 22417 / M140     | 2017.08.31 | 20°52.1'N-18°56.3'W  | 20-0         | DF-14 |
|                            | tap1_glu1_0         | 321                            | 1.2                                             | 0.56      | 562                                                                     | KH-17-4          | 2017.09.10 | 21°16.6'N-160°45'W   | Surface      | DF-14 |
|                            | St14_glu_double     | 270                            | 1.2                                             | 0.51      | 677                                                                     | St14 / KH-17-4   | 2017.09.23 | 23°N-160°E           | 20-0         | DF-14 |
|                            | St14_glu2_0         | 228                            | ND                                              | –         | –                                                                       | St14 / KH-17-4   | 2017.09.23 | 23°N-160°E           | 100-50       | DF-14 |
|                            | St14_glu3_0         | 211                            | 0.8                                             | 0.46      | 852                                                                     | St14 / KH-17-4   | 2017.09.23 | 23°N-160°E           | 50-20        | DF-14 |
|                            | St15_glu4_0         | 219                            | 1.0                                             | 0.52      | 839                                                                     | St15 / KH-17-4   | 2017.09.27 | 23°N-150°E           | 20-0         | DF-14 |
|                            | St16_glu5_0         | 262                            | 1.7                                             | 0.50      | 622                                                                     | St16 / KH-17-4   | 2017.09.30 | 23°N-140°E           | 50-20        | DF-14 |
|                            | St16_glu6_0         | 236                            | 0.4                                             | –         | –                                                                       | St16 / KH-17-4   | 2017.09.30 | 23°N-140°E           | 20-0         | DF-14 |
|                            | St16_glu7_0         | 219                            | 0.5                                             | 0.34      | 429                                                                     | St16 / KH-17-4   | 2017.09.30 | 23°N-140°E           | 20-0         | DF-14 |
|                            | St16_glu8_0         | 228                            | 1.5                                             | 0.51      | 594                                                                     | St16 / KH-17-4   | 2017.09.30 | 23°N-140°E           | 20-0         | DF-14 |
|                            | St16_glu9_0         | 219                            | 0.3                                             | 0.46      | 584                                                                     | St16 / KH-17-4   | 2017.09.30 | 23°N-140°E           | 50-20        | DF-14 |
|                            | St16_glu10_0        | 186                            | 0.6                                             | 0.54      | 519                                                                     | St16 / KH-17-4   | 2017.09.30 | 23°N-140°E           | 20-0         | DF-14 |
|                            | St16_glu11_0        | 211                            | 0.4                                             | 0.33      | 691                                                                     | St16 / KH-17-4   | 2017.09.30 | 23°N-140°E           | 20-0         | DF-14 |
| <i>Globigerinita uvula</i> |                     |                                |                                                 |           |                                                                         |                  |            |                      |              |       |
|                            | 0720-0612_uvu       | 169                            | 0.9                                             | 0.35      | 784                                                                     | MR13-04          | 2013.07.20 | 42°N-152°33'E        | Surface      | DF-03 |
|                            | 0720-0612_uvu2      | 144                            | 0.2                                             | 0.20      | 780                                                                     | MR13-04          | 2013.07.20 | 42°N-152°33'E        | Surface      | DF-03 |
|                            | 0720-0612_uvu3      | 145                            | ND                                              | –         | –                                                                       | MR13-04          | 2013.07.20 | 42°N-152°33'E        | Surface      | DF-03 |
|                            | 0720-1218_uvu       | 167                            | 0.2                                             | 0.29      | 640                                                                     | MR13-04          | 2013.07.20 | 42°24.3'N-153°02.7'E | Surface      | DF-03 |
|                            | 0720-1218_uvu-small | 134                            | 0.4                                             | 0.45      | 535                                                                     | MR13-04          | 2013.07.20 | 42°24.3'N-153°02.7'E | Surface      | DF-03 |



| Species                     | ID               | Test size<br>( $\mu\text{m}$ ) | Chl <i>a</i> (ng<br>foraminifer <sup>-1</sup> ) | $F_v/F_n$ | $\sigma_{\text{psu}} (\times 10^{-20} \text{ m}^2$<br>quanta <sup>-1</sup> ) | Station / Cruise | Date       | Latitude-Longitude   | Depth<br>(m) | FRRf  |
|-----------------------------|------------------|--------------------------------|-------------------------------------------------|-----------|------------------------------------------------------------------------------|------------------|------------|----------------------|--------------|-------|
|                             | 0724-1206_uvu    | 155                            | 0.2                                             | 0.39      | 536                                                                          | MR13-04          | 2013.07.24 | 47°N-160°E           | Surface      | DF-03 |
|                             | 0724-1206_uvu2   | 156                            | ND                                              | –         | –                                                                            | MR13-04          | 2013.07.24 | 47°N-160°E           | Surface      | DF-03 |
|                             | 0725-0613_uvu    | 144                            | 0.4                                             | 0.29      | 423                                                                          | MR13-04          | 2013.07.25 | 44°37.7'N-156°13.1'E | Surface      | DF-03 |
|                             | 0725-0613_uvu2   | 133                            | 0.3                                             | 0.26      | 522                                                                          | MR13-04          | 2013.07.25 | 44°37.7'N-156°13.1'E | Surface      | DF-03 |
|                             | K2-0-50-c2_uvu   | 122                            | 0.2                                             | 0.28      | 780                                                                          | K2 / MR13-04     | 2013.07.23 | 47°N-160°E           | 50–0         | DF-03 |
|                             | K2-0-50_uvu2     | 120                            | 0.1                                             | –         | –                                                                            | K2 / MR13-04     | 2013.07.23 | 47°N-160°E           | 50–0         | DF-03 |
|                             | 12-uvu1          | 214                            | 0.7                                             | 0.43      | 618                                                                          | MR14-02          | 2014.02.21 | 1°N-147°E            | Surface      | DF-03 |
|                             | 17-uvu2          | 304                            | 1.7                                             | 0.51      | 646                                                                          | MR14-02          | 2014.02.26 | 4°58'S-154°44'E      | Surface      | DF-03 |
|                             | Stn22406_uvu1    | 143                            | 0.3                                             | 0.55      | 564                                                                          | 22406 / M140     | 2017.08.17 | 12°18.6'N-36°56.6'W  | 80–60        | DF-14 |
| <i>Tenuitella fleisheri</i> |                  |                                |                                                 |           |                                                                              |                  |            |                      |              |       |
|                             | Stn22407_fleis1  | 205                            | 0.1                                             | –         | –                                                                            | 22407 / M140     | 2017.08.18 | 12°5.8'N-33°47.1'W   | 500–300      | DF-14 |
|                             | Stn22407_fleis2  | 190                            | 0.1                                             | –         | –                                                                            | 22407 / M140     | 2017.08.18 | 12°5.8'N-33°47.1'W   | 500–300      | DF-14 |
|                             | Stn22407_fleis3  | 171                            | 0.1                                             | –         | –                                                                            | 22407 / M140     | 2017.08.18 | 12°5.8'N-33°47.1'W   | 500–300      | DF-14 |
|                             | Stn22407_fleis4  | 186                            | 0.2                                             | –         | –                                                                            | 22407 / M140     | 2017.08.18 | 12°5.8'N-33°47.1'W   | 500–300      | DF-14 |
|                             | Stn22407_fleis5  | 131                            | 0.1                                             | –         | –                                                                            | 22407 / M140     | 2017.08.18 | 12°5.8'N-33°47.1'W   | 500–300      | DF-14 |
|                             | Stn22407_fleis6  | 177                            | 0.1                                             | –         | –                                                                            | 22407 / M140     | 2017.08.18 | 12°5.8'N-33°47.1'W   | 500–300      | DF-14 |
|                             | Stn22407_fleis7  | 176                            | 0.1                                             | –         | –                                                                            | 22407 / M140     | 2017.08.18 | 12°5.8'N-33°47.1'W   | 500–300      | DF-14 |
|                             | Stn22407_fleis8  | 164                            | 0.1                                             | –         | –                                                                            | 22407 / M140     | 2017.08.18 | 12°5.8'N-33°47.1'W   | 500–300      | DF-14 |
|                             | Stn22407_fleis9  | 164                            | 0.1                                             | –         | –                                                                            | 22407 / M140     | 2017.08.18 | 12°5.8'N-33°47.1'W   | 500–300      | DF-14 |
|                             | Stn22407_fleis10 | 165                            | 0.1                                             | –         | –                                                                            | 22407 / M140     | 2017.08.18 | 12°5.8'N-33°47.1'W   | 500–300      | DF-14 |
|                             | Stn22407_fleis11 | 164                            | ND                                              | –         | –                                                                            | 22407 / M140     | 2017.08.18 | 12°5.8'N-33°47.1'W   | 300–200      | DF-14 |
|                             | Stn22407_fleis12 | 145                            | 0.1                                             | –         | –                                                                            | 22407 / M140     | 2017.08.18 | 12°5.8'N-33°47.1'W   | 100–80       | DF-14 |
|                             | Stn22407_fleis13 | 173                            | 0.2                                             | –         | –                                                                            | 22407 / M140     | 2017.08.18 | 12°5.8'N-33°47.1'W   | 20–0         | DF-14 |

**Table S2.** Coefficients of regressional equation ( $y = bx^a$ ) to calculate protein biomass ( $\mu\text{g foraminifer}^{-1}$ ) from test size ( $\mu\text{m}$ ) based on Movellan (2013). In Movellan (2013), individual protein content was shown to be determined from test size using power function. For species whose test size-biomass relationship was not presented in his study, the protein biomass was estimated based on the relationship established by morphologically similar species

| Species                                   | b                     | a    | Referenced species                   |
|-------------------------------------------|-----------------------|------|--------------------------------------|
| <i>Orbulina universa</i>                  | $9.87 \times 10^{-4}$ | 1.35 | <i>Orbulina universa</i>             |
| <i>Sphaeroidinella dehiscentis</i>        | $1.09 \times 10^{-3}$ | 1.25 | <i>Globigerinoides sacculifer</i>    |
| <i>Globigerinoides sacculifer</i>         | $1.09 \times 10^{-3}$ | 1.25 | <i>Globigerinoides sacculifer</i>    |
| <i>Globigerinoides conglobatus</i>        | $1.09 \times 10^{-3}$ | 1.25 | <i>Globigerinoides sacculifer</i>    |
| <i>Globigerinoides ruber</i> (white)      | $1.09 \times 10^{-3}$ | 1.25 | <i>Globigerinoides sacculifer</i>    |
| <i>Globigerinoides ruber</i> (pink)       | $1.09 \times 10^{-3}$ | 1.25 | <i>Globigerinoides sacculifer</i>    |
| <i>Globoturborotalita rubescens</i>       | $1.09 \times 10^{-3}$ | 1.25 | <i>Globigerinoides sacculifer</i>    |
| <i>Globoturborotalita tenella</i>         | $1.09 \times 10^{-3}$ | 1.25 | <i>Globigerinoides sacculifer</i>    |
| <i>Globigerinella calida</i>              | $1.49 \times 10^{-5}$ | 2.04 | <i>Globigerinella siphonifera</i>    |
| <i>Globigerinella siphonifera</i> Type I  | $1.49 \times 10^{-5}$ | 2.04 | <i>Globigerinella siphonifera</i>    |
| <i>Globigerinella siphonifera</i> Type II | $1.49 \times 10^{-5}$ | 2.04 | <i>Globigerinella siphonifera</i>    |
| <i>Globigerinella adamsi</i>              | $1.49 \times 10^{-5}$ | 2.04 | <i>Globigerinella siphonifera</i>    |
| <i>Globigerina bulloides</i>              | $1.68 \times 10^{-4}$ | 1.62 | <i>Globigerina bulloides</i>         |
| <i>Turborotalita quinqueloba</i>          | $1.68 \times 10^{-4}$ | 1.62 | <i>Globigerina bulloides</i>         |
| <i>Turborotalita humilis</i>              | $1.68 \times 10^{-4}$ | 1.62 | <i>Globigerina bulloides</i>         |
| <i>Hastigerina pelagica</i>               | $2.34 \times 10^{-5}$ | 2.02 | <i>Hastigerina pelagica</i>          |
| <i>Hastigerinella digitata</i>            | $2.34 \times 10^{-5}$ | 2.02 | <i>Hastigerina pelagica</i>          |
| <i>Neogloboquadrina incompta</i>          | $9.23 \times 10^{-3}$ | 0.87 | <i>Neogloboquadrina incompta</i>     |
| <i>Neogloboquadrina pachyderma</i>        | $9.23 \times 10^{-3}$ | 0.87 | <i>Neogloboquadrina incompta</i>     |
| <i>Neogloboquadrina dutertrei</i>         | $4.30 \times 10^{-5}$ | 1.89 | <i>Neogloboquadrina dutertrei</i>    |
| <i>Pulleniatina obliquiloculata</i>       | $6.51 \times 10^{-6}$ | 2.17 | <i>Globorotalia inflata</i>          |
| <i>Globorotalia inflata</i>               | $6.51 \times 10^{-6}$ | 2.17 | <i>Globorotalia inflata</i>          |
| <i>Globorotalia menardii</i>              | $3.20 \times 10^{-3}$ | 1.07 | <i>Globorotalia hirsta</i>           |
| <i>Globorotalia scitula</i>               | $3.20 \times 10^{-3}$ | 1.07 | <i>Globorotalia hirsta</i>           |
| <i>Globorotalia crassaformis</i>          | $7.66 \times 10^{-6}$ | 2.10 | <i>Globorotalia truncatulinoides</i> |
| <i>Globorotalia truncatulinoides</i>      | $7.66 \times 10^{-6}$ | 2.10 | <i>Globorotalia truncatulinoides</i> |
| <i>Candeina nitida</i>                    | $9.23 \times 10^{-3}$ | 0.87 | <i>Neogloboquadrina incompta</i>     |
| <i>Globigerinita glutinata</i>            | $9.23 \times 10^{-3}$ | 0.87 | <i>Neogloboquadrina incompta</i>     |
| <i>Globigerinita uvula</i>                | $9.23 \times 10^{-3}$ | 0.87 | <i>Neogloboquadrina incompta</i>     |
| <i>Tenuitella fleisheri</i>               | $9.23 \times 10^{-3}$ | 0.87 | <i>Neogloboquadrina incompta</i>     |
